# Supplementary material for: Mechanistic study of allopurinol oxidation using aldehyde oxidase, xanthine oxidase and cytochrome P450 enzymes
Source: Royal Society of Chemistry journal article supplement (doi:10.1039/c6ra19197e), 2016-01-01
Supplement: c6ra19197e1.pdf [file c6ra19197e1.pdf]

## *Electronic Supplementary Information*

### **Mechanistic Study of Allopurinol Oxidation Using Aldehyde Oxidase, Xanthine Oxidase and Cytochrome P450 Enzymes**

Saber Mirzaei,<sup>a</sup> Avat Arman Taherpour\*<sup>ab</sup> and Shahryar Mohamadi<sup>a</sup>

<sup>a</sup>*Department of Organic Chemistry, Faculty of Chemistry, Razi University, Kermanshah, Iran*

<sup>b</sup>*Medical Biology Research Center, Kermanshah University of Medical Sciences, Kermanshah, Iran*

\**E-mail: avatarman.taherpour@gmail.com*

## Table of Contents

|                                                                                                                                                                                                                                                                        | Page No. |
|------------------------------------------------------------------------------------------------------------------------------------------------------------------------------------------------------------------------------------------------------------------------|----------|
| <b>Figure S1.</b> The 2D sketch of all 10 tautomers of allopurinol .....                                                                                                                                                                                               | 4        |
| <b>Table S1.</b> Relative free energies of allopurinol tautomers (in kcal.mol <sup>-1</sup> ) .....                                                                                                                                                                    | 4        |
| <b>Table S2.</b> The Effect of basis set on the relative free energies of tautomer 1 and tautomer 2 .....                                                                                                                                                              | 5        |
| <b>Figure S2.</b> Structure of deprotonated allopurinol .....                                                                                                                                                                                                          | 5        |
| <b>Table S3.</b> Allopurinol deprotonation energy in comparison to the most stable tautomer (tauto-1) .....                                                                                                                                                            | 5        |
| <b>Figure S3.</b> The 3D representation of the Highest Occupied Molecular Orbital (HOMO) and Lowest Unoccupied Molecular Orbital (LUMO) plots of the tautomer 1, 2 and 10 of allopurinol.....                                                                          | 6        |
| <b>Table S4.</b> The orbital contribution analysis (for C3, see scheme 1) of HOMO and LUMO of the tautomer 1, 2 and 10 of allopurinol using the Hirshfeld method.....                                                                                                  | 6        |
| <b>Table S5.</b> Highest Occupied Molecular Orbital (HOMO) energy- Lowest Unoccupied Molecular Orbital (LUMO) energy - Hardness $\eta$ - Electronegativity $X$ - Global electrophilicity $\omega$ , and Nucelophilicity Index $N$ . all data calculated at G3MP2 ..... | 7        |
| <b>Figure S4.</b> The gas and water-assisted interconversion between the tautomer 1 and tautomer 2 of allopurinol. The values are calculated at B3LYP/6-31+G* (in kcal.mol <sup>-1</sup> ) .....                                                                       | 8        |
| <b>Figure S5.</b> The stepwise mechanism for O-up orientation of allopurinol tautomer 1 .....                                                                                                                                                                          | 9        |
| <b>Figure S6.</b> The stepwise mechanism for the O-up of allopurinol tautomer 10 .....                                                                                                                                                                                 | 10       |
| <b>Figure S7.</b> The stepwise mechanism for the O-down of allopurinol tautomer 10 .....                                                                                                                                                                               | 11       |
| <b>Figure S8.</b> The concerted mechanism of neutral allopurinol (tautomer1-O-Up) .....                                                                                                                                                                                | 12       |
| <b>Figure S9.</b> The concerted mechanism of neutral allopurinol (tautomer2-O-Up) .....                                                                                                                                                                                | 12       |
| <b>Figure S10.</b> The concerted mechanism of neutral allopurinol (tautomer2-O-Down) .....                                                                                                                                                                             | 12       |
| <b>Figure S11.</b> The concerted mechanism of neutral allopurinol (tautomer10-O-Down) .....                                                                                                                                                                            | 13       |
| <b>Figure S12.</b> The concerted mechanism of deprotonated allopurinol (structure I) .....                                                                                                                                                                             | 13       |
| <b>Figure S13.</b> The concerted mechanism of deprotonated allopurinol (structure III) .....                                                                                                                                                                           | 13       |

|                                                                                                                                                                                                                                                              |    |
|--------------------------------------------------------------------------------------------------------------------------------------------------------------------------------------------------------------------------------------------------------------|----|
| <b>Table S6.</b> Transition State Bond Lengths (in Å) of the concerted mechanism for different structures (figure S7-S12) .....                                                                                                                              | 14 |
| <b>Table S7.</b> The Bond Lengths (in Å) of the P450 mechanism for some selected structures (figure 13). The numbers in bold are for quartet spin states .....                                                                                               | 14 |
| <b>Figure S14.</b> The structure of allopurinol oxidation using P450 .....                                                                                                                                                                                   | 15 |
| <b>Figure S15.</b> Relative energy profile (in kcal.mol <sup>-1</sup> ) for allopurinol tautomer 2 metabolism using the active site of P450 (Cpd I). The numbers are calculated using the B3LYP/B1+ZPE(B1) and B3LYP(SMD)/B2//B1+ZPE(B1), respectively ..... | 16 |
| <b>Figure S16.</b> The 3D representation and Cartesian coordinate of glutamate model compound (butanoic acid) and allopurinol tautomer 1 complex input and output structures.....                                                                            | 17 |
| <b>S1.</b> Cartesian coordinates of gas and water-assisted interconversion between the tautomer 1 and tautomer 2 of allopurinol (figure S3) .....                                                                                                            | 18 |
| <b>S2.</b> Cartesian coordinates of stepwise mechanisms .....                                                                                                                                                                                                | 22 |
| <b>S3.</b> Cartesian coordinates of concerted mechanisms of neutral allopurinol .....                                                                                                                                                                        | 29 |
| <b>S4.</b> Cartesian coordinates of concerted mechanisms of deprotonated allopurinol .....                                                                                                                                                                   | 34 |
| <b>S5.</b> Cartesian coordinates of allopurinol oxidation using the cytochrome P450 .....                                                                                                                                                                    | 36 |

**Figure S1.** The 2D sketch of all 10 tautomers of allopurinol.

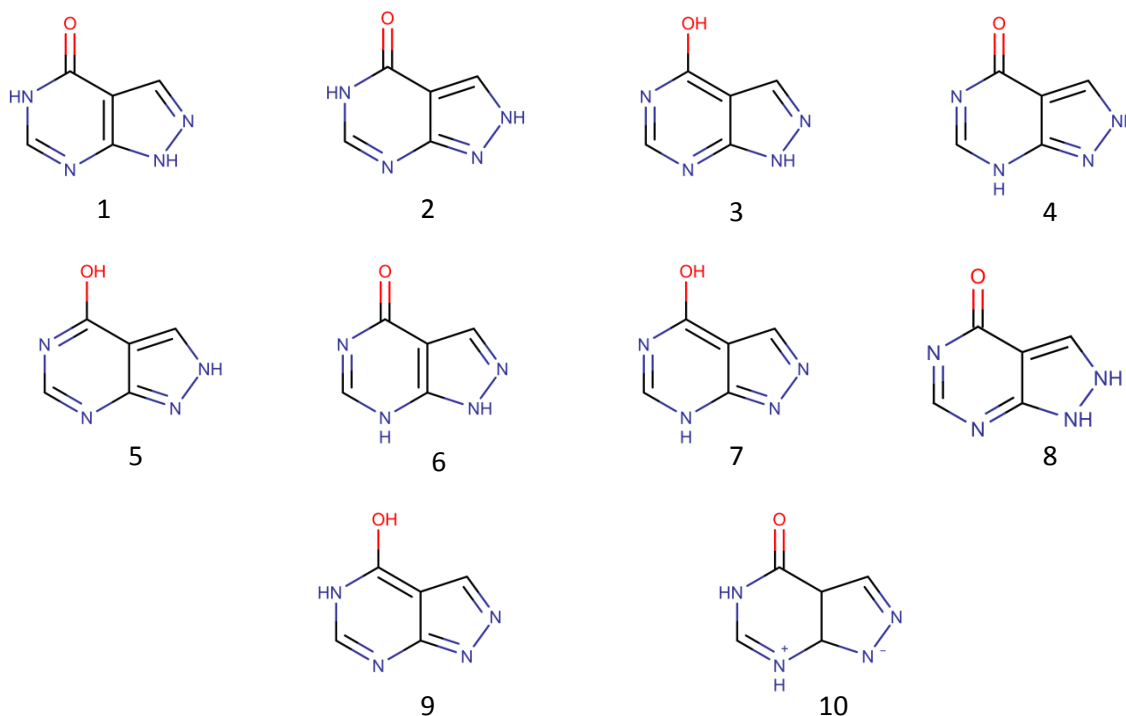

**Table S1.** Relative free energies of allopurinol tautomers ( $\Delta G$  in kcal.mol<sup>-1</sup>).

| structure | Vacuo              |       | Water            |                  |
|-----------|--------------------|-------|------------------|------------------|
|           | B3LYP <sup>a</sup> | G3MP2 | SM8 <sup>a</sup> | SMD <sup>a</sup> |
| 1         | 0.00 (0.00)        | 0.00  | 0.00             | 0.00 (0.00)      |
| 2         | 3.64 (3.66)        | 3.28  | 0.55             | 0.92 (0.53)      |
| 3         | 6.75 (7.02)        | 4.34  | 8.32             | 10.12 (11.63)    |
| 4         | 12.61 (14.45)      | 11.85 | 4.67             | 5.95 (5.84)      |
| 5         | 13.83 (14.11)      | 11.25 | 10.54            | 12.70 (13.83)    |
| 6         | 17.74 (17.22)      | 16.45 | 8.28             | 7.71 (7.53)      |
| 7         | 26.09 (26.26)      | 23.26 | 17.38            | 20.62 (19.42)    |
| 8         | 32.28 (32.81)      | 34.1  | 14.44            | 15.41 (15.21)    |
| 9         | 40.83 (40.74)      | 36.58 | 22.37            | 24.01 (25.65)    |
| 10        | 27.82 (27.81)      | 27.86 | 10.40            | 13.98 (10.07)    |

<sup>a</sup>These data are calculated at B3LYP/6-31+G\* level. The numbers in parentheses are calculated using the B3LYP-D3BJ/6-31+G\* method.

**Table S2.** Effect of basis set on the relative free energies of tautomer 1 and tautomer 2.

|                   | <b>Tauto-1</b> | <b>Tauto-2</b> |
|-------------------|----------------|----------------|
| 6-31+G*           | 0.00           | 3.64           |
| 6-311++G(3df,3pd) | 0.00           | 3.52           |
| Aug-CC-pVTZ       | 0.00           | 3.51           |

All calculations were done using the B3LYP functional.

**Figure S2.** Structures of deprotonated allopurinol.

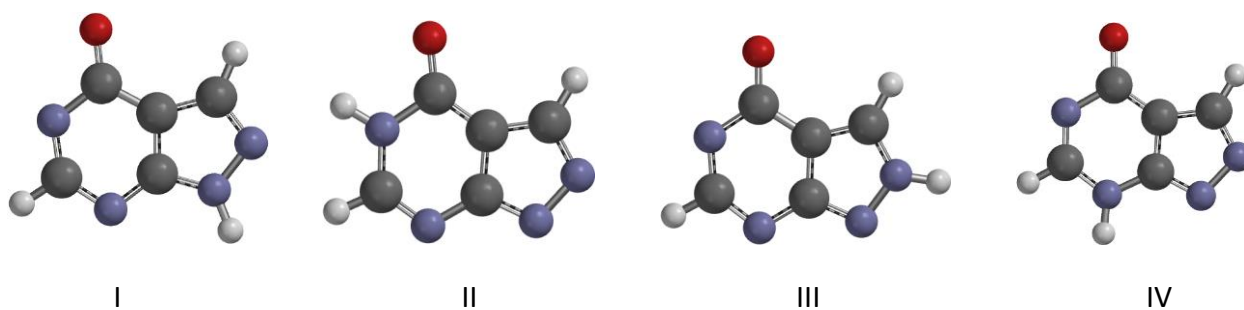

**Table S3.** Allopurinol deprotonation free energy ( $\Delta G$  in kcal.mol<sup>-1</sup>) in comparison to the most stable tautomer (tauto-1). The values in parentheses are calculated using SM8 solvation model.

| structure | <b>Relative Energy</b> |       | <b>Deprotonation Energy</b> |        |
|-----------|------------------------|-------|-----------------------------|--------|
|           | B3LYP                  | G3MP2 | B3LYP                       | G3MP2  |
| I         | 0.00 (0.09)            | 0.00  | 331.64 (277.93)             | 333.95 |
| II        | 3.89 (0.00)            | 3.23  | 335.53 (277.83)             | 337.18 |
| III       | 8.41 (1.99)            | 8.10  | 340.05 (279.83)             | 342.05 |
| IV        | 10.37 (4.57)           | 9.34  | 342.01 (282.40)             | 343.29 |

**Figure S3.** The 3D representation of the Highest Occupied Molecular Orbital (HOMO) and Lowest Unoccupied Molecular Orbital (LUMO) plots of the tautomer 1, 2 and 10 of allopurinol.

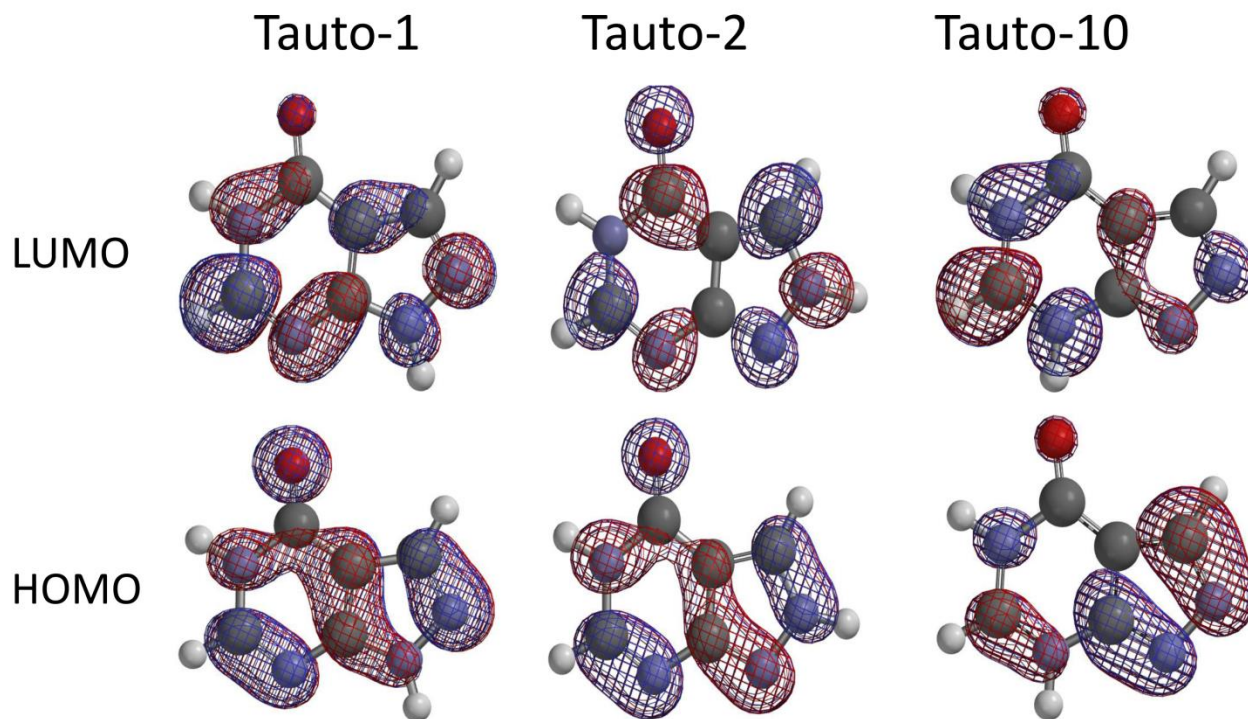

**Table S4.** The orbital contribution analysis (for C3, see scheme 1) of HOMO and LUMO of the tautomer 1, 2 and 10 of allopurinol using the Hirshfeld method.

|             | <b>Tauto-1</b> | <b>Tauto-2</b> | <b>Tauto-3</b> |
|-------------|----------------|----------------|----------------|
| <b>LUMO</b> | 30.741%        | 11.118%        | 36.731%        |
| <b>HOMO</b> | 8.518%         | 10.161%        | 5.798%         |

**Table S5.** Highest Occupied Molecular Orbital (HOMO) energy- Lowest Unoccupied Molecular Orbital (LUMO) energy - Hardness  $\eta$ - Electronegativity  $X$ - Global electrophilicity  $\omega$ , and Nucleophilicity Index  $N$ . All data calculated at G3MP2.

| structure      | HOMO (au) | LUMO (au) | $\eta$ (eV) | $X$ (eV) | $\omega$ (eV) | $N$ (eV) |
|----------------|-----------|-----------|-------------|----------|---------------|----------|
| Tauto-1        | -0.33826  | 0.02641   | 9.923       | 8.486    | 3.628         | 0.276    |
| Tauto-2        | -0.33852  | 0.03257   | 10.098      | 8.325    | 3.432         | 0.291    |
| Tauto-10       | -0.31383  | 0.00112   | 8.570       | 8.509    | 4.224         | 0.237    |
| Deprotonated-I | -0.15335  | 0.13948   | 7.968       | 0.377    | 0.009         | 111.112  |

Reactivity and electrophilicity of table S4 species were considered using the following standard equations:

$$\eta = -E_{LUMO} - E_{HOMO}$$

$$X = -(E_{LUMO} + E_{HOMO})/2$$

$$\omega = X^2 / 2\eta$$

$$N = 1/\omega$$

This method for calculating reactivity has been used by several groups:<sup>1-5</sup>

1. P. A. Krieter, A. E. Colletti, G. A. Doss, R. R. Miller. *Drug Metab. Dispos.* 1994, **22**, 625.
2. (a) H. Toufar, K. Nulens, G. O. A. Janssens, W. J. Mortier, R. A. Schoonheydt, F. De Proft, P. Geerlings. *J. Phys. Chem. B.* 1996, **100**, 15383. (b) F. De Proft, P. Geerlings. *Chem. Rev.* 2001, **101**, 1451. (c) P. Geerlings, F. De Proft, W. Langenaeker. *Chem. Rev.* 2003, **103**, 1793. (d) T. Fievez, N. Sablon, F. DeProft, P. W. Ayers, P. J. Geerlings. *Chem. Theory Comput.* 2008, **4**, 1065. (e) G. Roos, P. Geerlings, J. Messens. *J. Phys. Chem. B.* 2009, **113**, 13465. (f) J. T. Muya, F. De Proft, P. Geerlings, M. T. Nguyen, A. Ceulemans. *J. Phys. Chem. A.* 2011, **115**, 9069.
3. (a) N. T. Brown, N. Mora-Diez. *Phys. Chem. B* 2006, **110**, 9270. (b) L. A. M. M. Barbosa, R. A. van Santen. *J. Mol. Struct. THEOCHEM.* 2000, **497**, 173.
4. P. K. Chattaraj, U. Sarkar, D. R. Roy. *Chem. Rev.* 2006, **106**, 2065.
5. P. K. Chattaraj, A. Chakraborty, S. Giri. *J. Phys. Chem. A.* 2009, **113**, 10068.

**Figure S4.** The gas and water-assisted interconversion between the tautomer 1 and tautomer 2 of allopurinol. The values are calculated at B3LYP/6-31+G\* ( $\Delta E$  in kcal.mol<sup>-1</sup>) and the numbers in bolds and in parentheses are calculated using the B3LYP-D3BJ/6-31+G\* and SMD solvation models, respectively.

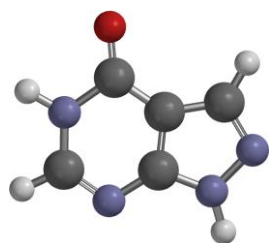

Tauto-1 = 0.00, **0.00** (0.00, **0.00**)

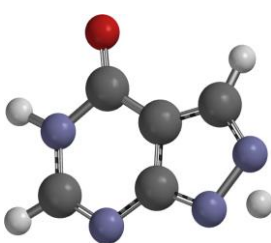

TS = 53.32, **58.86** (52.77, **52.86**)

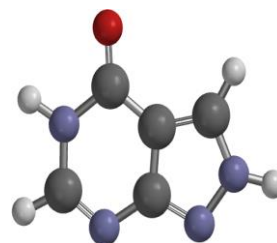

Tauto-2 = 3.61, **3.64** (0.87, **0.51**)

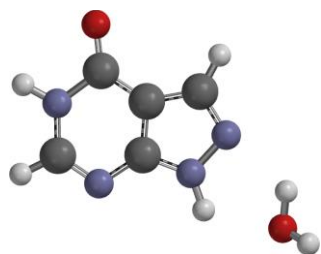

Tauto-1+1w = 0.00 (0.00)

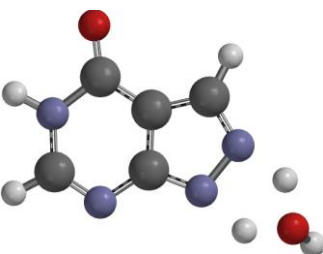

TS+1w = 29.08 (28.40)

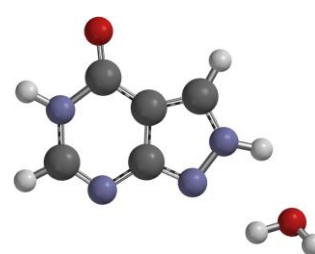

Tauto-2+1w = 2.45 (0.67)

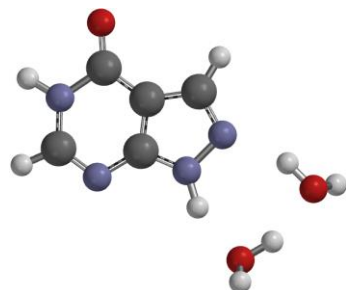

Tauto-1+2w = 0.00, **0.00** (0.00, **0.00**)

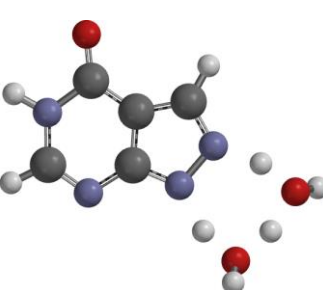

TS+2w = 17.77, **15.27** (16.38, **16.27**)

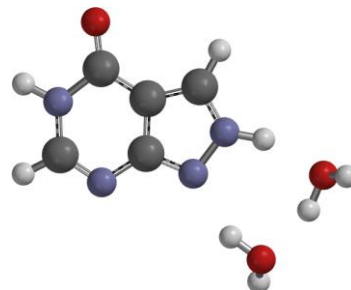

Tauto-2+2w = 1.52, **1.44** (0.49, **0.37**)

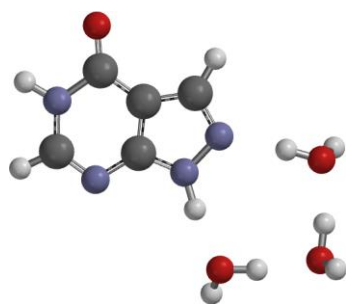

Tauto-1+3w = 0.00 (0.00)

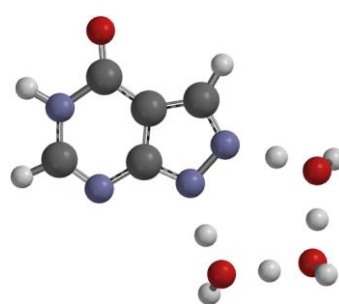

TS+3w = 17.82 (17.02)

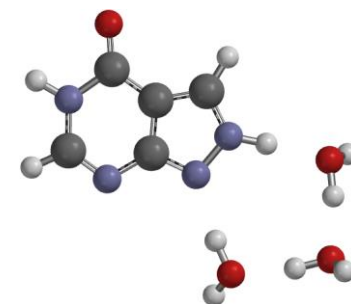

Tauto-2+3w = 0.92 (0.40)



**Figure S5.** The stepwise mechanism for O-up orientation of allopurinol tautomer 1.

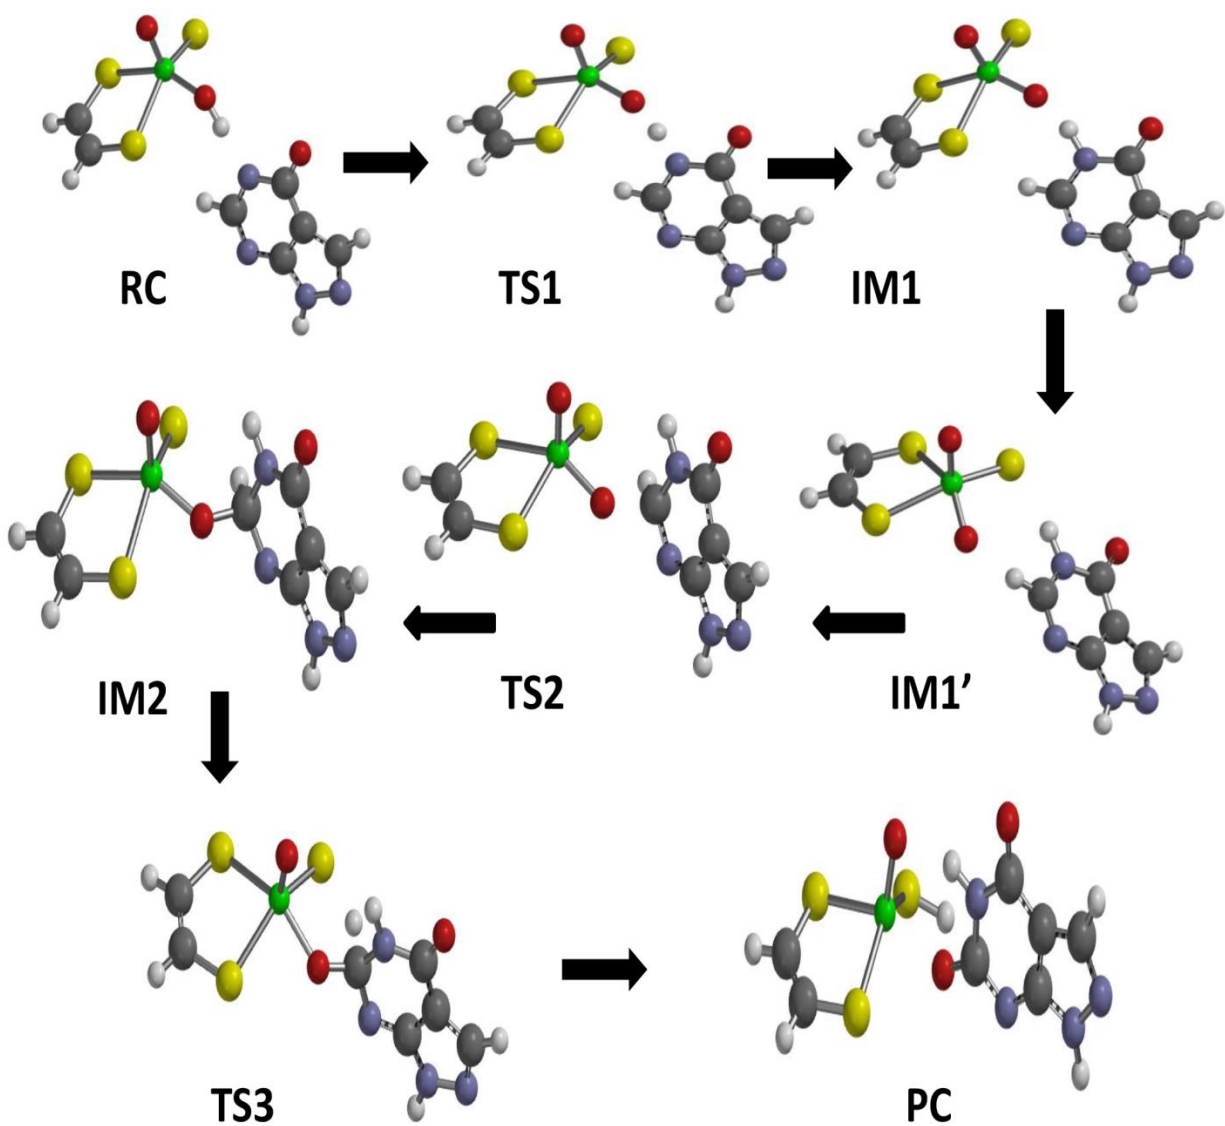

Figure S6. The stepwise mechanism for the O-up of allopurinol tautomer 10.

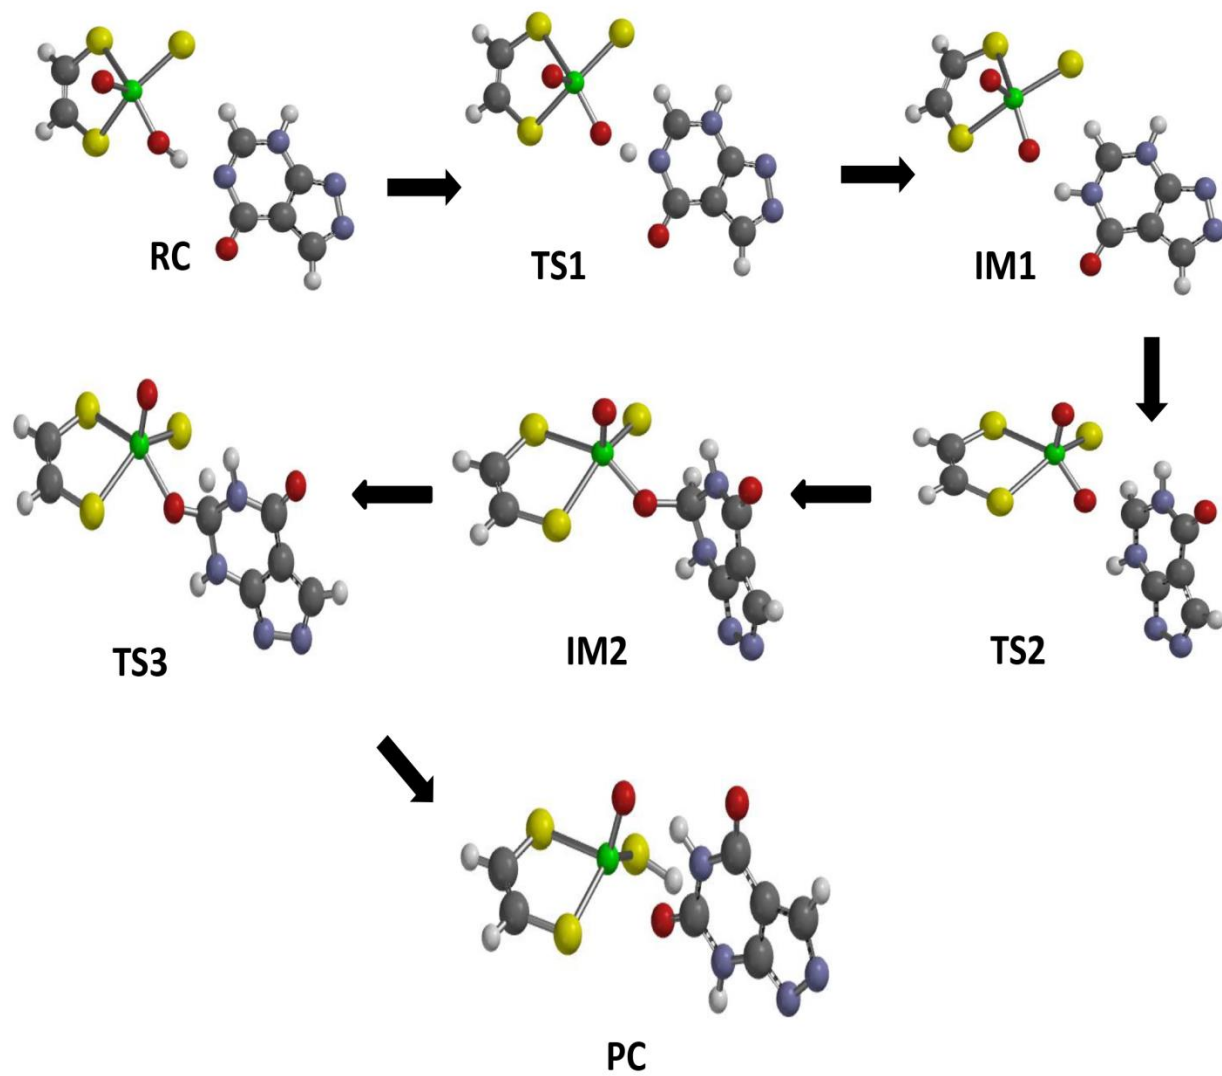

**Figure S7.** The stepwise mechanism for the O-down of allopurinol tautomer 10.

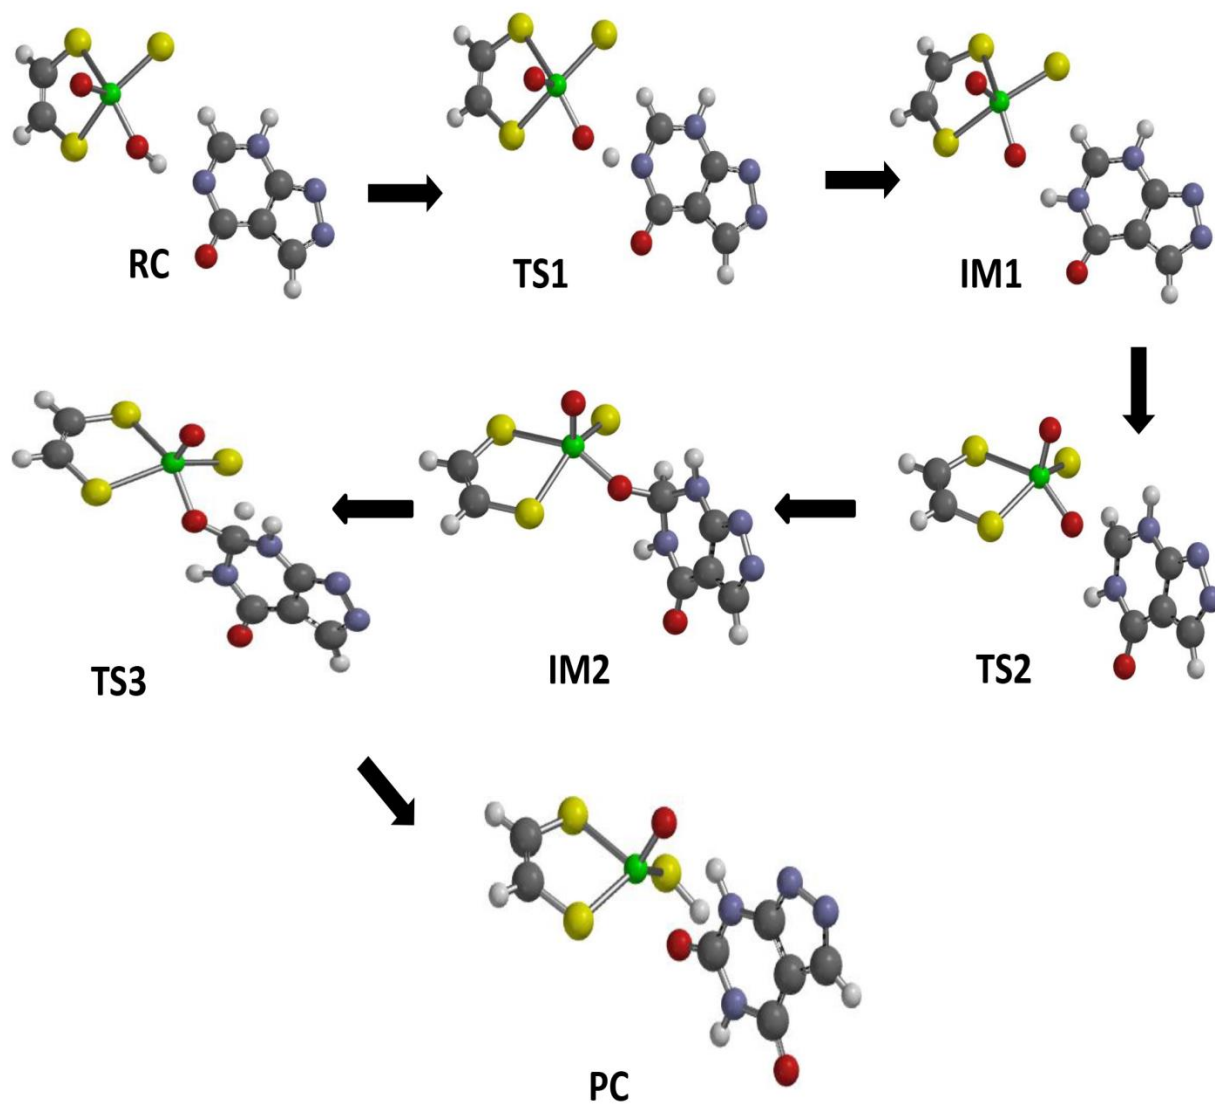

**Figure S8.** The concerted mechanism of neutral allopurinol (tautomer1-O-Up,  $\Delta E$  in kcal.mol<sup>-1</sup>). The numbers in bold are calculated using the B3LYP-D3BJ method.

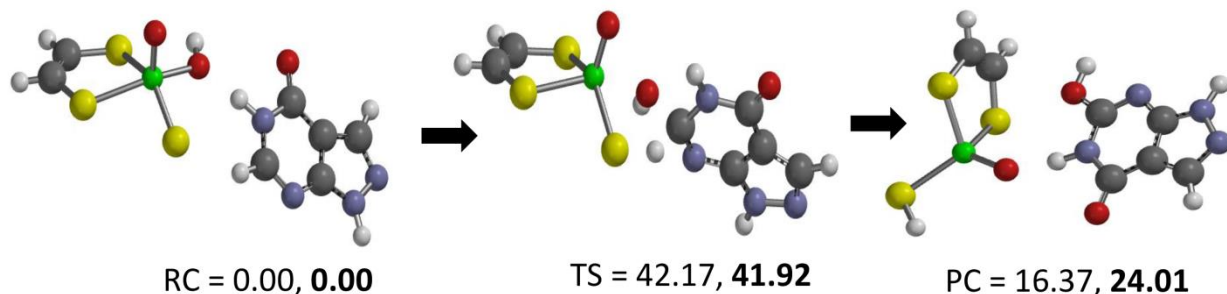

**Figure S9.** The concerted mechanism of neutral allopurinol (tautomer2-O-Up,  $\Delta E$  in kcal.mol<sup>-1</sup>). The numbers in bold are calculated using the B3LYP-D3BJ method.

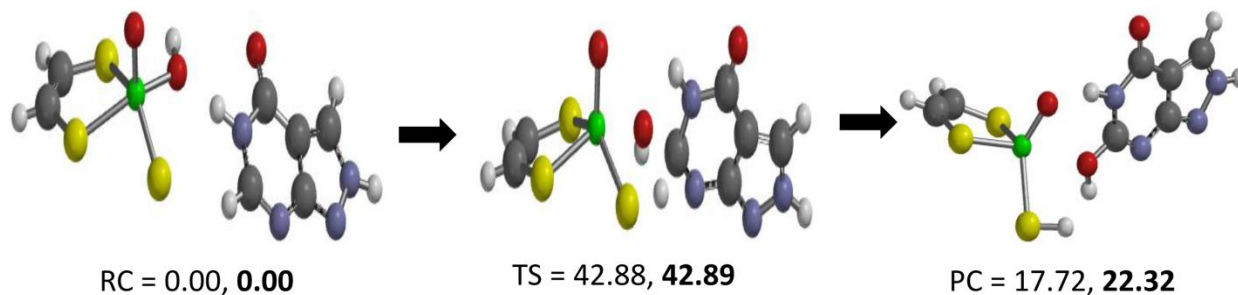

**Figure S10.** The concerted mechanism of neutral allopurinol (tautomer2-O-Down,  $\Delta E$  in kcal.mol<sup>-1</sup>). The numbers in bold are calculated using the B3LYP-D3BJ method.

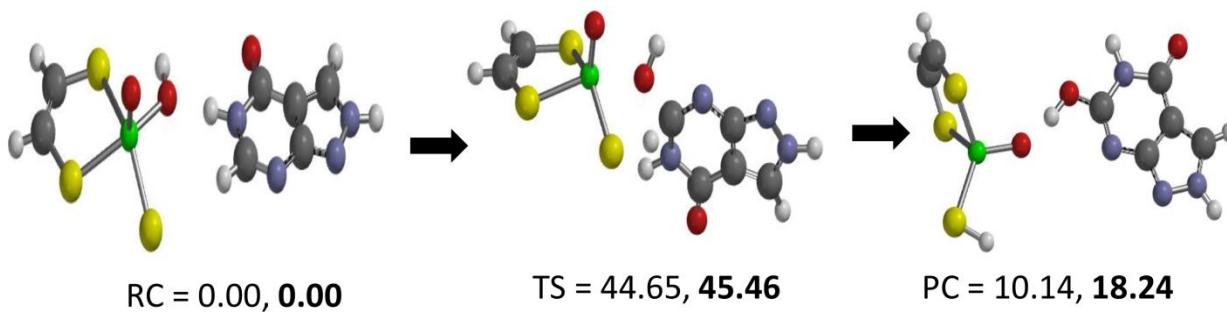

**Figure S11.** The concerted mechanism of neutral allopurinol (tautomer10-O-Down,  $\Delta E$  in kcal.mol<sup>-1</sup>). The numbers in bold are calculated using the B3LYP-D3BJ method.

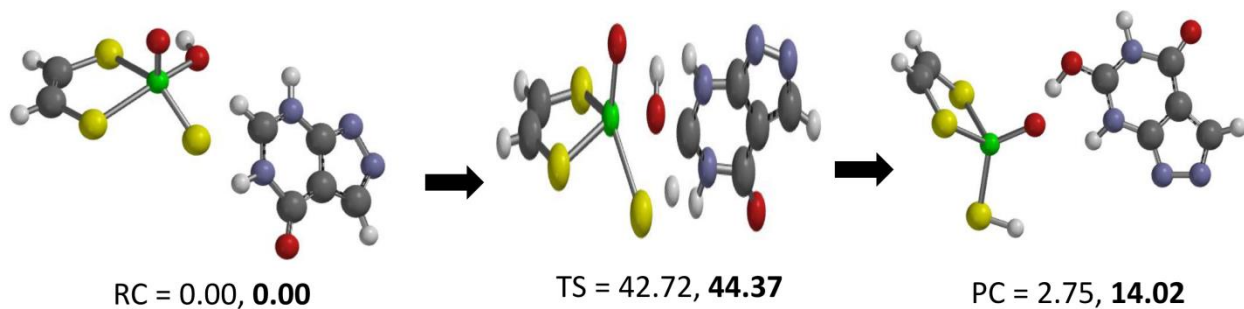

**Figure S12.** The concerted mechanism of deprotonated allopurinol (structure I,  $\Delta E$  in kcal.mol<sup>-1</sup>). The numbers in bold are calculated using the B3LYP-D3BJ method.

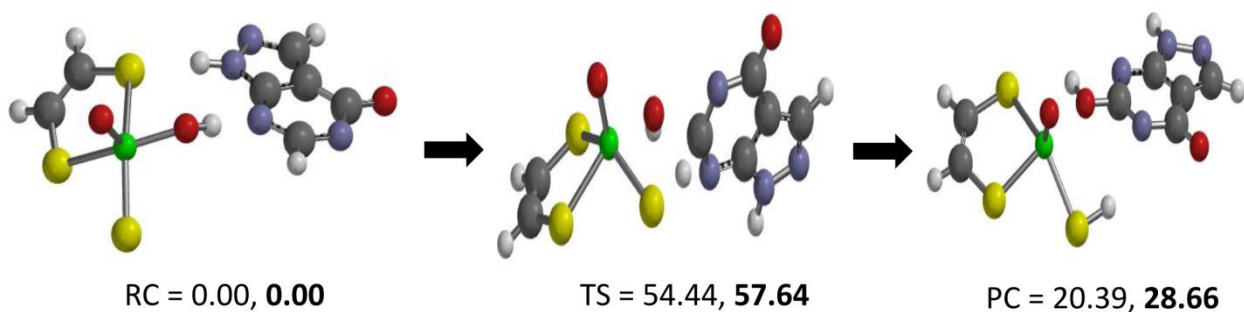

**Figure S13.** The concerted mechanism of deprotonated allopurinol (structure III,  $\Delta E$  in kcal.mol<sup>-1</sup>).

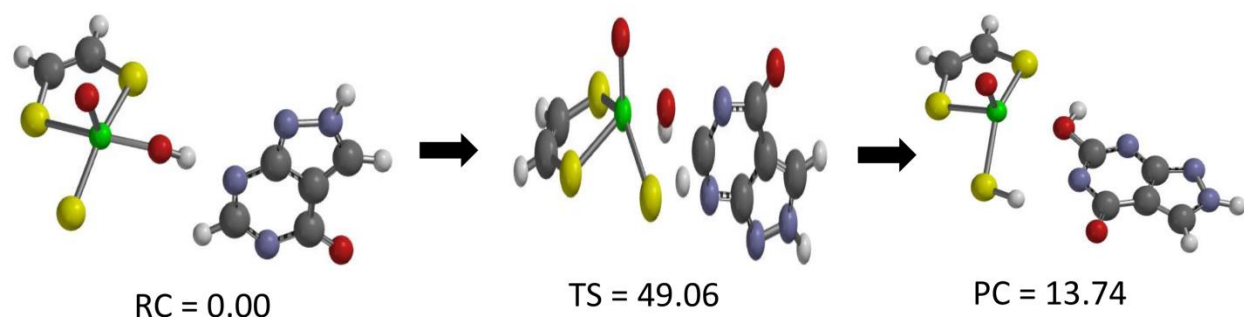

**Table S6.** Transition state bond lengths (in Å) of the concerted mechanism for different structures (figure S7-S12)

|                         | Mo-OH | OH-C | C-H  | H-S  | S-Mo |
|-------------------------|-------|------|------|------|------|
| <b>T1 (O-up)</b>        | 2.19  | 1.47 | 1.40 | 1.58 | 2.29 |
| <b>T2 (O-up)</b>        | 2.18  | 1.49 | 1.37 | 1.60 | 2.28 |
| <b>T2 (O-down)</b>      | 2.22  | 1.48 | 1.39 | 1.59 | 2.29 |
| <b>T10 (O-down)</b>     | 2.24  | 1.43 | 1.59 | 1.48 | 2.32 |
| <b>Deprotonated-I</b>   | 2.08  | 1.78 | 1.37 | 1.58 | 2.29 |
| <b>Deprotonated-III</b> | 2.07  | 1.80 | 1.38 | 1.58 | 2.29 |

**Table S7.** The bond lengths (in Å) of the P450 mechanism for some selected structures (figure 13). The numbers in bold are for quartet spin states.

|      | Tauto-1           |                   |                   | Tauto-2           |                   |                   |
|------|-------------------|-------------------|-------------------|-------------------|-------------------|-------------------|
|      | TS1               | Int1              | TS2               | TS1               | Int1              | TS2               |
| Fe-O | 1.72/ <b>1.71</b> | 1.83/ <b>1.84</b> | 1.94/ <b>2.12</b> | 1.72/ <b>1.71</b> | 1.87/ <b>1.87</b> | 1.93/ <b>2.11</b> |
| O-C  | 1.82/ <b>1.85</b> | 1.40/ <b>1.40</b> | 1.34/ <b>1.31</b> | 1.82/ <b>1.85</b> | 1.39/ <b>1.39</b> | 1.34/ <b>1.32</b> |
| C-H  | 1.08/ <b>1.08</b> | 1.09/ <b>1.09</b> | 1.19/ <b>1.21</b> | 1.08/ <b>1.08</b> | 1.10/ <b>1.10</b> | 1.18/ <b>1.20</b> |
| H-N  | 2.65/ <b>2.66</b> | 2.54/ <b>2.72</b> | 1.79/ <b>1.72</b> | 2.60/ <b>2.56</b> | 2.67/ <b>2.69</b> | 1.80/ <b>1.76</b> |

**Figure S14.** The structure of allopurinol oxidation using P450.

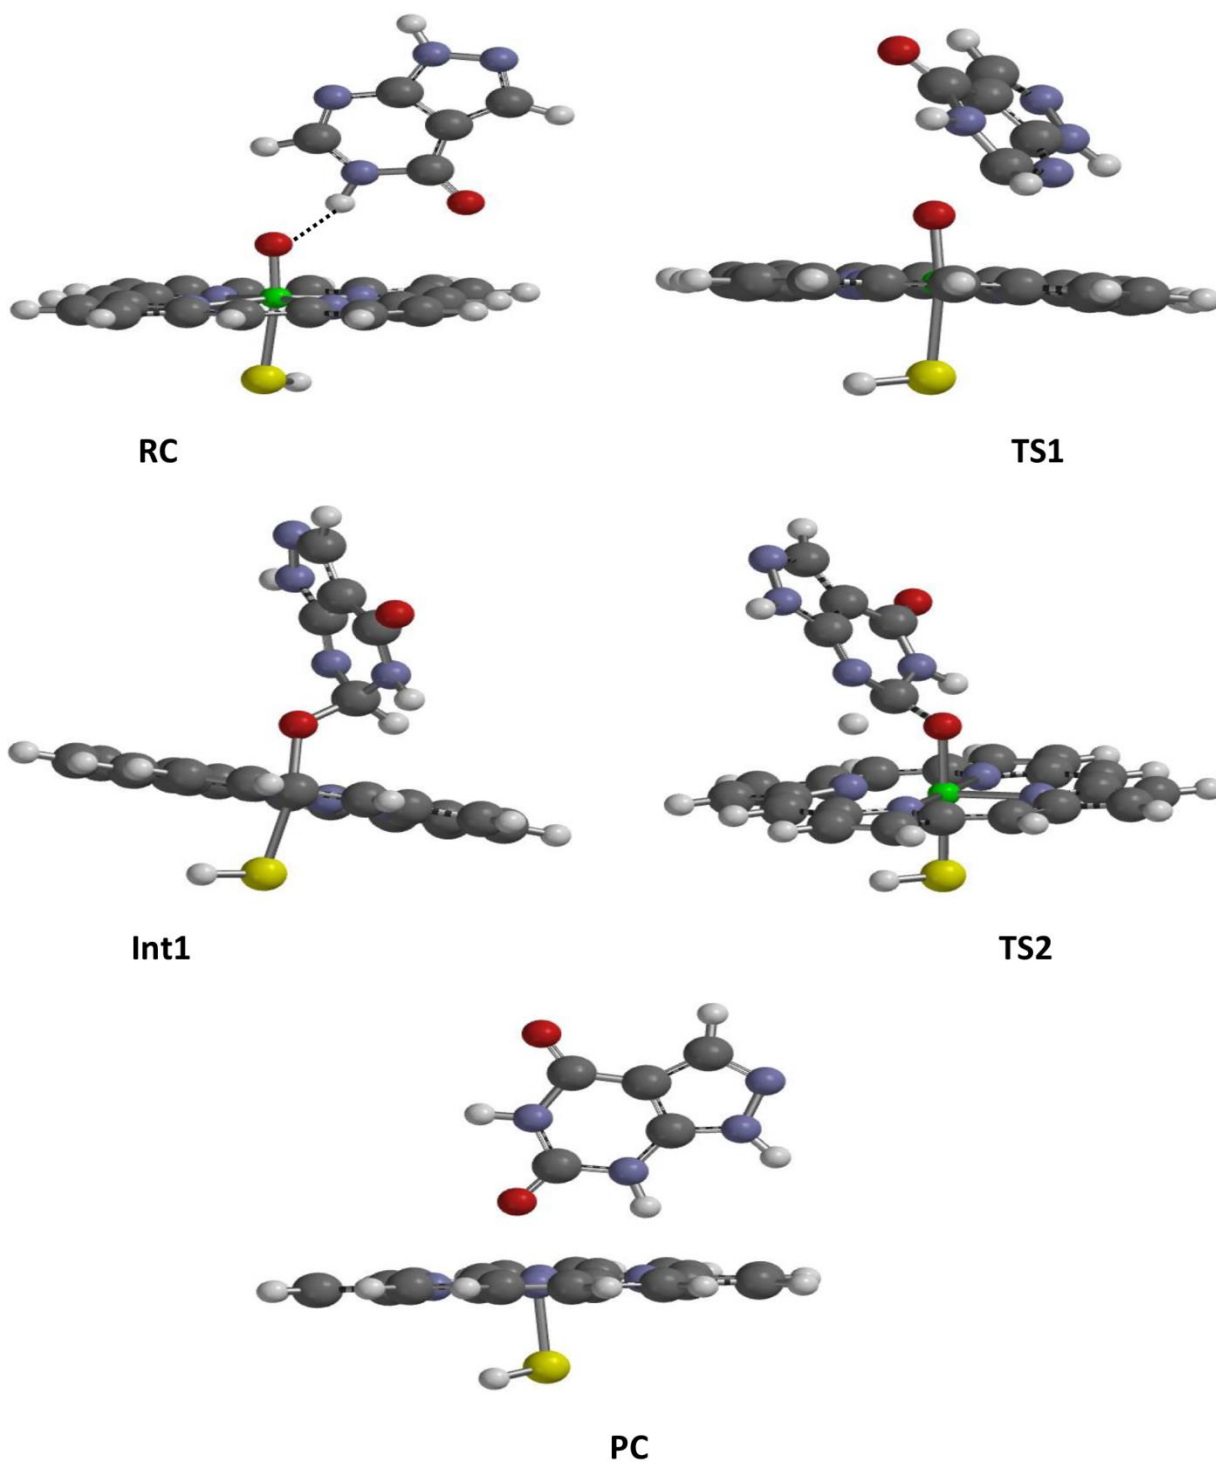

**Figure S15.** Relative energy profile ( $\Delta E$  in kcal.mol<sup>-1</sup>) for allopurinol tautomer 2 metabolism using the active site of P450 (Cpd I). The numbers are calculated using the B3LYP/B1+ZPE(B1) and B3LYP(SMD)/B2//B1+ZPE(B1), respectively.

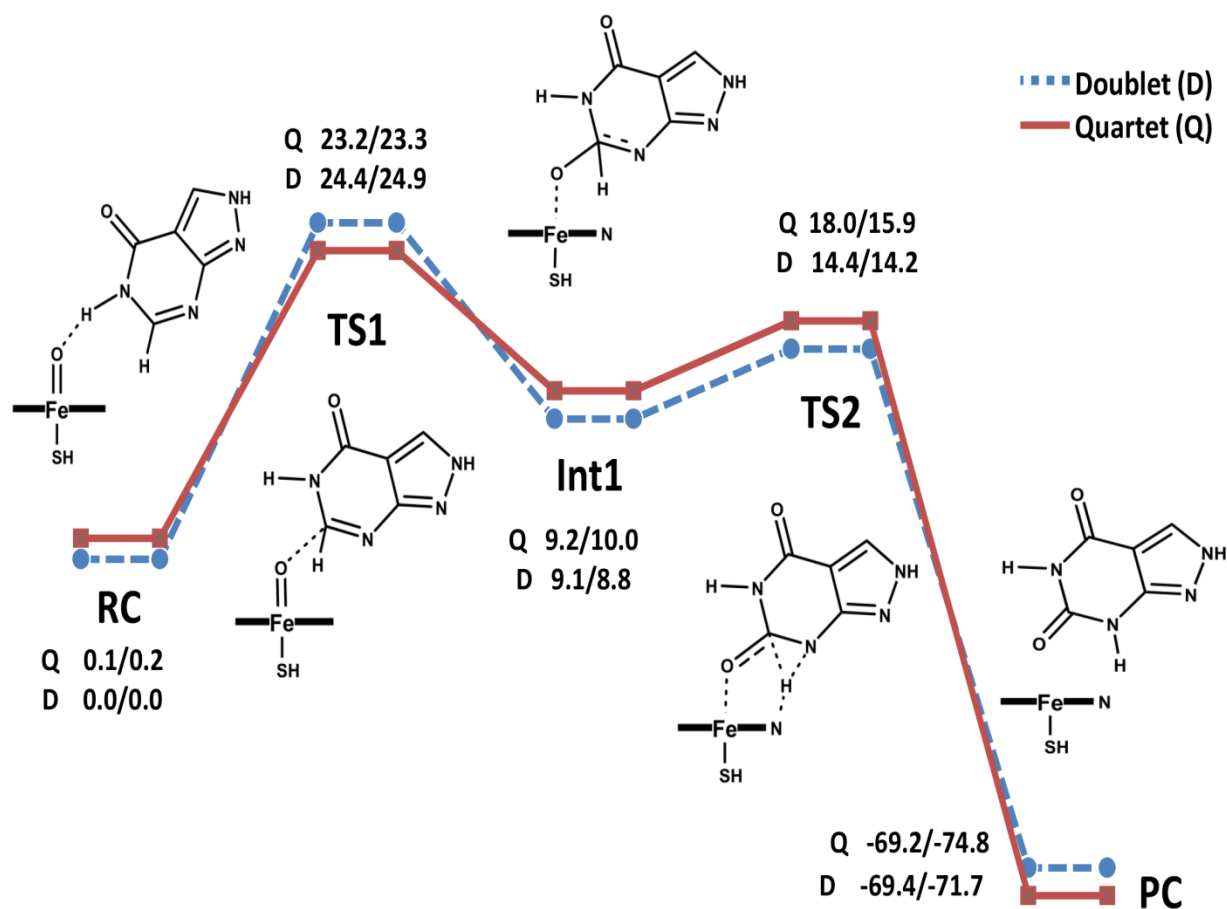



**Figure S16.** The 3D representation and Cartesian coordinate of glutamate model compound (butanoic acid) and allopurinol tautomer 1 complex input and output structures (B3LYP/6-31+G(d,p)).

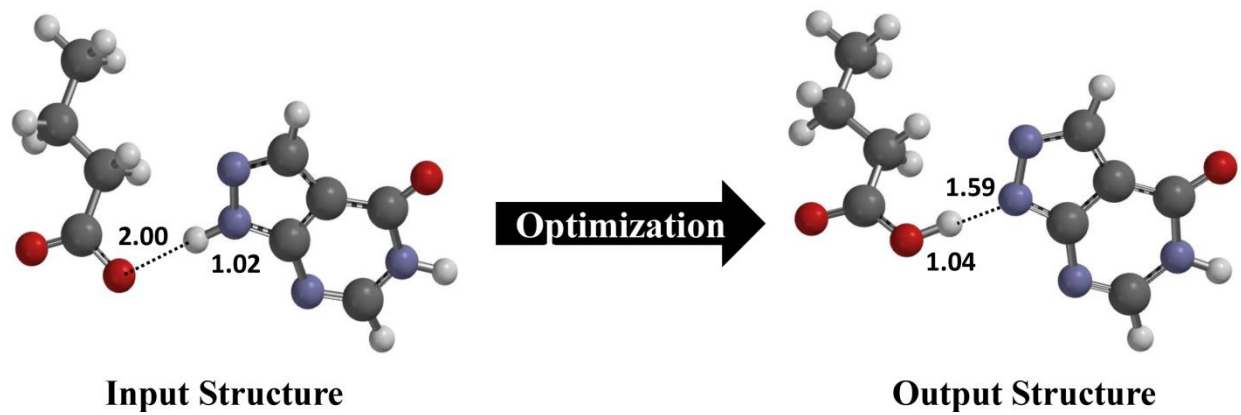

|   |             |             |             |
|---|-------------|-------------|-------------|
| C | -3.66197100 | 0.70700700  | 0.00322900  |
| N | -1.96658500 | -1.64037200 | 0.57757300  |
| N | -4.05368900 | -0.51198000 | 0.63016500  |
| C | -2.27251100 | 0.65741800  | -0.33476400 |
| C | -1.49250000 | -0.49631700 | -0.03972400 |
| C | -3.22213700 | -1.58445800 | 0.87821600  |
| N | -0.22879500 | -0.31017200 | -0.44661800 |
| N | -0.14039400 | 0.93745000  | -1.00790900 |
| C | -1.34143600 | 1.51979900  | -0.94648800 |
| O | -4.50187600 | 1.59418000  | -0.16157900 |
| H | -5.02835000 | -0.55424900 | 0.90011900  |
| H | -3.70032900 | -2.43239800 | 1.36848600  |
| H | 0.60305051  | -0.89990552 | -0.47206244 |
| H | -1.49502500 | 2.51945600  | -1.33626100 |
| C | 4.10489100  | 2.33700900  | 0.99575400  |
| H | 3.48770200  | 2.96036600  | 0.33690500  |
| H | 3.61333000  | 2.31841700  | 1.97730800  |
| H | 5.07509100  | 2.83610800  | 1.11885300  |
| C | 4.26785000  | 0.92255500  | 0.42965200  |
| H | 4.79479500  | 0.96465100  | -0.53223900 |
| H | 4.90664700  | 0.32130600  | 1.08775500  |
| C | 2.92946700  | 0.20868600  | 0.23561800  |
| H | 2.37613200  | 0.16260200  | 1.18550200  |
| H | 2.26770900  | 0.76612500  | -0.44026700 |
| C | 3.07956700  | -1.22375100 | -0.27988500 |
| O | 1.95312300  | -1.85450400 | -0.58717700 |
| O | 4.16959900  | -1.76618800 | -0.38881700 |

|   |             |             |             |
|---|-------------|-------------|-------------|
| C | -3.66945600 | 0.67814300  | 0.02608600  |
| N | -1.91472200 | -1.61401500 | 0.60857100  |
| N | -4.02247400 | -0.52642600 | 0.69260000  |
| C | -2.29074100 | 0.65195200  | -0.35258400 |
| C | -1.47984900 | -0.47966600 | -0.05064700 |
| C | -3.16339000 | -1.57753100 | 0.94504900  |
| N | -0.23141600 | -0.27790900 | -0.49881900 |
| N | -0.18484200 | 0.95619200  | -1.09207300 |
| C | -1.39545800 | 1.51912100  | -1.01391300 |
| O | -4.53298600 | 1.54996700  | -0.13867600 |
| H | -4.98741200 | -0.58249200 | 0.99202300  |
| H | -3.60836700 | -2.42140400 | 1.46928400  |
| H | 1.07447200  | -1.18581300 | -0.55545600 |
| H | -1.57857100 | 2.50404200  | -1.42392900 |
| C | 4.14684900  | 2.30449900  | 1.05969400  |
| H | 3.56036600  | 2.95012500  | 0.39497000  |
| H | 3.63126100  | 2.28192000  | 2.02823800  |
| H | 5.12379600  | 2.77960400  | 1.21373900  |
| C | 4.29667400  | 0.89398600  | 0.47621300  |
| H | 4.84803600  | 0.94025200  | -0.47095400 |
| H | 4.90508400  | 0.27176200  | 1.14264200  |
| C | 2.94686100  | 0.21481600  | 0.23792600  |
| H | 2.37319100  | 0.16164300  | 1.17432800  |
| H | 2.31822700  | 0.80414000  | -0.44098000 |
| C | 3.05669900  | -1.20942400 | -0.30818900 |
| O | 1.91712600  | -1.78950300 | -0.65451000 |
| O | 4.13148000  | -1.79096900 | -0.40852100 |

**S1. Cartesian coordinates of gas and water-assisted interconversion between the tautomer 1 and tautomer 2 of allopurinol (figure S3).**

**T1**

|                                              |                             |             |            |
|----------------------------------------------|-----------------------------|-------------|------------|
| Zero-point correction=                       | 0.100394 (Hartree/Particle) |             |            |
| Thermal correction to Energy=                | 0.107163                    |             |            |
| Thermal correction to Enthalpy=              | 0.108107                    |             |            |
| Thermal correction to Gibbs Free Energy=     | 0.068916                    |             |            |
| Sum of electronic and zero-point Energies=   | -487.091597                 |             |            |
| Sum of electronic and thermal Energies=      | -487.084829                 |             |            |
| Sum of electronic and thermal Enthalpies=    | -487.083885                 |             |            |
| Sum of electronic and thermal Free Energies= | -487.123075                 |             |            |
| C                                            | 1.42312800                  | 0.39880900  | 0.00000000 |
| N                                            | -0.53929500                 | -1.80059900 | 0.00000000 |
| N                                            | 1.69027000                  | -1.00467700 | 0.00000000 |
| C                                            | 0.00000000                  | 0.62813300  | 0.00000000 |
| C                                            | -0.86805100                 | -0.47452800 | 0.00000000 |
| C                                            | 0.74791800                  | -1.99615700 | 0.00000000 |
| N                                            | -2.12083200                 | 0.03643600  | 0.00000000 |
| N                                            | -2.12963200                 | 1.39903300  | 0.00000000 |
| C                                            | -0.85309200                 | 1.76200700  | 0.00000000 |
| O                                            | 2.34650500                  | 1.20059300  | 0.00000000 |
| H                                            | 2.67490100                  | -1.25128000 | 0.00000000 |
| H                                            | 1.13160400                  | -3.01336000 | 0.00000000 |
| H                                            | -2.99490900                 | -0.47100800 | 0.00000000 |
| H                                            | -0.58663000                 | 2.80997300  | 0.00000000 |

**T2**

|                                              |                             |             |            |
|----------------------------------------------|-----------------------------|-------------|------------|
| Zero-point correction=                       | 0.100422 (Hartree/Particle) |             |            |
| Thermal correction to Energy=                | 0.107143                    |             |            |
| Thermal correction to Enthalpy=              | 0.108087                    |             |            |
| Thermal correction to Gibbs Free Energy=     | 0.068992                    |             |            |
| Sum of electronic and zero-point Energies=   | -487.085884                 |             |            |
| Sum of electronic and thermal Energies=      | -487.079163                 |             |            |
| Sum of electronic and thermal Enthalpies=    | -487.078218                 |             |            |
| Sum of electronic and thermal Free Energies= | -487.117314                 |             |            |
| C                                            | 1.42903100                  | 0.37796700  | 0.00000000 |
| C                                            | -0.91698600                 | -0.48988400 | 0.00000000 |
| C                                            | 0.73371500                  | -2.00375400 | 0.00000000 |
| N                                            | -0.54549800                 | -1.81811400 | 0.00000000 |
| N                                            | 1.69295300                  | -1.00958000 | 0.00000000 |
| C                                            | 0.00000000                  | 0.60741800  | 0.00000000 |
| C                                            | -0.79704300                 | 1.74268500  | 0.00000000 |
| N                                            | -2.06737800                 | 1.27978100  | 0.00000000 |
| N                                            | -2.18545400                 | -0.07018700 | 0.00000000 |
| O                                            | 2.33948700                  | 1.19711200  | 0.00000000 |
| H                                            | 1.12689300                  | -3.01799100 | 0.00000000 |
| H                                            | 2.67487300                  | -1.26474600 | 0.00000000 |
| H                                            | -0.55681600                 | 2.79623500  | 0.00000000 |
| H                                            | -2.91551900                 | 1.82971200  | 0.00000000 |

**TS**

|                                              |                             |             |             |
|----------------------------------------------|-----------------------------|-------------|-------------|
| Zero-point correction=                       | 0.093810 (Hartree/Particle) |             |             |
| Thermal correction to Energy=                | 0.100513                    |             |             |
| Thermal correction to Enthalpy=              | 0.101457                    |             |             |
| Thermal correction to Gibbs Free Energy=     | 0.062339                    |             |             |
| Sum of electronic and zero-point Energies=   | -487.006617                 |             |             |
| Sum of electronic and thermal Energies=      | -486.999914                 |             |             |
| Sum of electronic and thermal Enthalpies=    | -486.998970                 |             |             |
| Sum of electronic and thermal Free Energies= | -487.038088                 |             |             |
| C                                            | -0.23935700                 | 0.55960400  | -0.00502000 |
| C                                            | -0.64974700                 | -0.79336100 | -0.01331900 |
| N                                            | -1.99631800                 | -0.88304900 | -0.09556500 |
| N                                            | -2.48148700                 | 0.49711200  | -0.06220800 |
| C                                            | -1.41394700                 | 1.31122600  | 0.03476100  |
| C                                            | 1.44598700                  | -1.56953000 | 0.01914200  |
| C                                            | 1.17527900                  | 0.89437100  | -0.00861600 |
| H                                            | -2.75228100                 | -0.36323000 | 0.78022000  |
| H                                            | -1.54508200                 | 2.38362800  | 0.10096400  |
| H                                            | 2.19300900                  | -2.35959800 | 0.03923600  |
| H                                            | 2.95650100                  | -0.14887100 | 0.00818100  |
| O                                            | 1.70072300                  | 1.99711200  | -0.01087800 |
| N                                            | 0.18883400                  | -1.88265600 | 0.01149300  |
| N                                            | 1.95079500                  | -0.28893500 | 0.00295600  |

**T1+1w**

|                                              |                             |             |             |
|----------------------------------------------|-----------------------------|-------------|-------------|
| Zero-point correction=                       | 0.124621 (Hartree/Particle) |             |             |
| Thermal correction to Energy=                | 0.134700                    |             |             |
| Thermal correction to Enthalpy=              | 0.135644                    |             |             |
| Thermal correction to Gibbs Free Energy=     | 0.088352                    |             |             |
| Sum of electronic and zero-point Energies=   | -563.502388                 |             |             |
| Sum of electronic and thermal Energies=      | -563.492308                 |             |             |
| Sum of electronic and thermal Enthalpies=    | -563.491364                 |             |             |
| Sum of electronic and thermal Free Energies= | -563.538656                 |             |             |
| C                                            | 1.93697800                  | -0.69756100 | -0.00455000 |
| C                                            | 1.73310900                  | 1.78154400  | -0.00089100 |
| C                                            | -0.14797600                 | 0.60111800  | 0.01073400  |
| C                                            | 0.49617800                  | -0.64849000 | 0.00536900  |
| C                                            | -0.55453400                 | -1.59870800 | 0.00889800  |
| N                                            | -1.73614900                 | -0.99194300 | 0.01756600  |
| N                                            | -1.47303200                 | 0.34501800  | 0.01989500  |
| H                                            | 2.30602300                  | 2.70548100  | -0.00396100 |
| H                                            | 3.48242000                  | 0.68036500  | -0.01495100 |
| H                                            | -0.49413900                 | -2.67829300 | 0.00516400  |
| H                                            | -2.26357500                 | 0.98529100  | 0.01853800  |
| H                                            | -5.04129200                 | 0.27835000  | 0.50596800  |
| O                                            | -4.28353100                 | 0.31715100  | -0.09525900 |
| H                                            | -3.85264900                 | -0.55842600 | -0.05615100 |
| N                                            | 0.43327700                  | 1.83858300  | 0.00871600  |
| N                                            | 2.46871100                  | 0.62696000  | -0.00722100 |
| O                                            | 2.68741000                  | -1.66346600 | -0.01032400 |

**TS+1w**

Zero-point correction= 0.119169 (Hartree/Particle)  
 Thermal correction to Energy= 0.127495  
 Thermal correction to Enthalpy= 0.128439  
 Thermal correction to Gibbs Free Energy= 0.085413  
 Sum of electronic and zero-point Energies= -563.458551  
 Sum of electronic and thermal Energies= -563.450225  
 Sum of electronic and thermal Enthalpies= -563.449281  
 Sum of electronic and thermal Free Energies= -563.492307

|   |             |             |             |
|---|-------------|-------------|-------------|
| C | -1.85363800 | -0.73785100 | -0.00129000 |
| C | -1.73885000 | 1.74335700  | -0.00180600 |
| C | 0.20532400  | 0.64516000  | 0.00793700  |
| C | -0.41522200 | -0.63206300 | 0.00575900  |
| C | 0.64575600  | -1.55348900 | 0.00664800  |
| N | 1.79035000  | -0.86831300 | 0.01451300  |
| N | 1.53541400  | 0.48212600  | 0.01609600  |
| H | -2.35211300 | 2.64159400  | -0.00545800 |
| H | -3.45003300 | 0.57505000  | -0.01203400 |
| H | 0.62882100  | -2.63461900 | 0.00152800  |
| H | 2.88619300  | 0.82367600  | -0.04769100 |
| H | 4.38958100  | 0.33697100  | 0.71079900  |
| O | 3.88311500  | 0.23216600  | -0.11204000 |
| H | 3.16364000  | -0.68544500 | -0.03888200 |
| N | -2.43544700 | 0.55846800  | -0.00559400 |
| N | -0.44694600 | 1.85570000  | 0.00576600  |
| O | -2.56185300 | -1.73763900 | -0.00386300 |

**T1+2w**

Zero-point correction= 0.150633 (Hartree/Particle)  
 Thermal correction to Energy= 0.162920  
 Thermal correction to Enthalpy= 0.163865  
 Thermal correction to Gibbs Free Energy= 0.111525  
 Sum of electronic and zero-point Energies= -639.921884  
 Sum of electronic and thermal Energies= -639.909597  
 Sum of electronic and thermal Enthalpies= -639.908653  
 Sum of electronic and thermal Free Energies= -639.960992

|   |             |             |             |
|---|-------------|-------------|-------------|
| C | -0.97138500 | -0.66366300 | -0.01248600 |
| C | -0.33391700 | 0.59067900  | 0.00353500  |
| N | 0.99310400  | 0.35269200  | -0.00837500 |
| N | 1.25920800  | -0.98361200 | -0.03296500 |
| C | 0.08371000  | -1.60461300 | -0.03547800 |
| C | -2.22741000 | 1.75354700  | 0.03096800  |
| C | -2.41205200 | -0.72558100 | -0.00461400 |
| H | 3.14733600  | -1.31226400 | -0.02742700 |
| H | 0.03313100  | -2.68463600 | -0.05476500 |
| H | -2.80918200 | 2.67193000  | 0.04777300  |
| H | -3.96865400 | 0.63810500  | 0.02603000  |
| H | 1.78578700  | 1.01296200  | -0.00445500 |
| O | 3.53718900  | 1.55842900  | 0.03958400  |
| H | 3.93149300  | 2.08016100  | -0.67449300 |
| H | 3.97611000  | 0.67277900  | 0.01917100  |
| O | 4.11666800  | -1.12144200 | -0.02314200 |
| H | 4.48206000  | -1.57306000 | 0.75205300  |
| N | -2.95461800 | 0.59256400  | 0.01908400  |
| N | -0.92897600 | 1.82259900  | 0.02421900  |
| O | -3.15295400 | -1.69922200 | -0.01509000 |

**T2-1w**

Zero-point correction= 0.124721 (Hartree/Particle)  
 Thermal correction to Energy= 0.134739  
 Thermal correction to Enthalpy= 0.135683  
 Thermal correction to Gibbs Free Energy= 0.088563  
 Sum of electronic and zero-point Energies= -563.498593  
 Sum of electronic and thermal Energies= -563.488575  
 Sum of electronic and thermal Enthalpies= -563.487630  
 Sum of electronic and thermal Free Energies= -563.534751

|   |             |             |             |
|---|-------------|-------------|-------------|
| C | 1.79076400  | 1.74926700  | -0.00272300 |
| C | 0.47816800  | -0.62581900 | 0.00565200  |
| C | -0.16039900 | 0.65191500  | 0.00979300  |
| C | 1.92088100  | -0.72943300 | -0.00405600 |
| N | -1.49145900 | 0.52745400  | 0.01814300  |
| N | -1.69151400 | -0.81398100 | 0.01946000  |
| C | -0.56220500 | -1.54801700 | 0.01118500  |
| H | 2.40506800  | 2.64683800  | -0.00659000 |
| H | 3.51021500  | 0.58579300  | -0.01551800 |
| H | -2.66218900 | -1.12179400 | 0.02321600  |
| H | -0.56887900 | -2.62858500 | 0.00929500  |
| H | -3.62864900 | 0.84084500  | -0.06475300 |
| O | -4.31426700 | 0.14501000  | -0.09331200 |
| H | -5.02463400 | 0.43480700  | 0.49714100  |
| O | 2.62193800  | -1.73327500 | -0.00824600 |
| N | 2.49576600  | 0.56289500  | -0.00817500 |
| N | 0.50212700  | 1.86088000  | 0.00636700  |

**2w-TS**

Zero-point correction= 0.141729 (Hartree/Particle)  
 Thermal correction to Energy= 0.152107  
 Thermal correction to Enthalpy= 0.153051  
 Thermal correction to Gibbs Free Energy= 0.105191  
 Sum of electronic and zero-point Energies= -639.896130  
 Sum of electronic and thermal Energies= -639.885753  
 Sum of electronic and thermal Enthalpies= -639.884809  
 Sum of electronic and thermal Free Energies= -639.932669

|   |             |             |             |
|---|-------------|-------------|-------------|
| C | 0.89587300  | -0.65443800 | 0.00794700  |
| C | 0.25030000  | 0.60762200  | -0.01157300 |
| N | -1.07782700 | 0.42372200  | -0.01022300 |
| N | -1.30875600 | -0.92485600 | 0.01257300  |
| C | -0.15059300 | -1.58940700 | 0.02331600  |
| H | -2.23606800 | 1.13082700  | -0.01562600 |
| H | -0.11926000 | -2.67026000 | 0.04303000  |
| H | 3.90510000  | 0.61412400  | -0.01085600 |
| H | -3.76226700 | 0.21757400  | 0.00676200  |
| O | -3.37355800 | 1.36503100  | -0.03907100 |
| H | -3.63027200 | 1.85921400  | 0.75595500  |
| H | -2.62298800 | -1.17549700 | 0.01009200  |
| O | -3.78669400 | -1.00957200 | 0.04258700  |
| H | -4.20869400 | -1.37282400 | -0.75237300 |
| N | 0.87623800  | 1.83208700  | -0.02644100 |
| C | 2.33593100  | -0.73163200 | 0.00928700  |
| C | 2.17033800  | 1.74686100  | -0.02531700 |
| H | 2.76484600  | 2.65753100  | -0.03701900 |
| N | 2.89104200  | 0.57656400  | -0.01018700 |
| O | 3.06445500  | -1.71637700 | 0.02373700  |

**T2+2w**

Zero-point correction= 0.150735 (Hartree/Particle)  
 Thermal correction to Energy= 0.162958  
 Thermal correction to Enthalpy= 0.163902  
 Thermal correction to Gibbs Free Energy= 0.111758  
 Sum of electronic and zero-point Energies= -639.919584  
 Sum of electronic and thermal Energies= -639.907362  
 Sum of electronic and thermal Enthalpies= -639.906418  
 Sum of electronic and thermal Free Energies= -639.958561

|   |             |             |             |
|---|-------------|-------------|-------------|
| C | -0.96900300 | -0.65140700 | 0.00407100  |
| C | -0.30207100 | 0.60890200  | -0.02146500 |
| N | 1.02553000  | 0.44770100  | -0.02976100 |
| N | 1.20112200  | -0.89799500 | -0.00814200 |
| C | 0.05266600  | -1.59682300 | 0.01233300  |
| C | -2.22319800 | 1.75585300  | -0.02273100 |
| C | -2.41290300 | -0.71911100 | 0.01569500  |
| H | 2.17341800  | -1.24551300 | -0.01019200 |
| H | 0.03290000  | -2.67714400 | 0.03224400  |
| H | -2.81396900 | 2.66903000  | -0.03118000 |
| H | -3.96976400 | 0.63593100  | 0.00598000  |
| H | 2.68514000  | 1.39071700  | -0.03913100 |
| O | 3.66734500  | 1.50140500  | -0.02458400 |
| H | 3.86440500  | 2.10012400  | 0.71080000  |
| H | 4.10315100  | -0.22510800 | 0.05322600  |
| O | 3.98872100  | -1.20918300 | 0.05240900  |
| H | 4.55379700  | -1.54992900 | -0.65639600 |
| O | -3.14046500 | -1.70366400 | 0.03612300  |
| N | -2.95621600 | 0.58837900  | -0.00048200 |
| N | -0.93141100 | 1.83462200  | -0.03366500 |

**T1+3w**

Zero-point correction= 0.175718 (Hartree/Particle)  
 Thermal correction to Energy= 0.190726  
 Thermal correction to Enthalpy= 0.191671  
 Thermal correction to Gibbs Free Energy= 0.132312  
 Sum of electronic and zero-point Energies= -716.338455  
 Sum of electronic and thermal Energies= -716.323447  
 Sum of electronic and thermal Enthalpies= -716.322503  
 Sum of electronic and thermal Free Energies= -716.381861

|   |             |             |             |
|---|-------------|-------------|-------------|
| C | 1.45987500  | -0.66622400 | 0.01216700  |
| C | 0.82172500  | 0.58739500  | -0.03039600 |
| N | -0.50559500 | 0.35144200  | -0.05607300 |
| N | -0.76971000 | -0.98377500 | -0.02987200 |
| C | 0.40509400  | -1.60621800 | 0.01108300  |
| C | 2.71619800  | 1.75012000  | -0.01461600 |
| C | 2.89994200  | -0.72841000 | 0.04711700  |
| H | -1.28710400 | 1.03158500  | -0.06780300 |
| H | 0.45404900  | -2.68617600 | 0.04038800  |
| H | 3.29798600  | 2.66861100  | -0.02268600 |
| H | 4.45699100  | 0.63538400  | 0.05458500  |
| H | -2.50076500 | -1.66004200 | -0.06631900 |
| O | -3.44937500 | -1.94789700 | -0.09115400 |
| H | -3.56528500 | -2.42254800 | -0.92773300 |
| H | -4.44658100 | -0.52884200 | 0.08108600  |
| O | -4.88306900 | 0.35837700  | 0.16607800  |
| H | -5.36521600 | 0.34349900  | 1.00605200  |
| H | -2.89975000 | 2.69575900  | -0.71215600 |
| O | -2.74331300 | 2.03711100  | -0.01981500 |
| H | -3.57736100 | 1.50401800  | 0.05586900  |
| N | 1.41829900  | 1.81910900  | -0.04729800 |
| N | 3.44320100  | 0.58958400  | 0.03065400  |
| O | 3.63983900  | -1.70206000 | 0.08547900  |

**3w-TS**

|                                              |                             |             |             |
|----------------------------------------------|-----------------------------|-------------|-------------|
| Zero-point correction=                       | 0.165563 (Hartree/Particle) |             |             |
| Thermal correction to Energy=                | 0.178312                    |             |             |
| Thermal correction to Enthalpy=              | 0.179256                    |             |             |
| Thermal correction to Gibbs Free Energy=     | 0.125261                    |             |             |
| Sum of electronic and zero-point Energies=   | -716.313162                 |             |             |
| Sum of electronic and thermal Energies=      | -716.300413                 |             |             |
| Sum of electronic and thermal Enthalpies=    | -716.299469                 |             |             |
| Sum of electronic and thermal Free Energies= | -716.353464                 |             |             |
| C                                            | 1.37321300                  | -0.67064500 | 0.01714200  |
| C                                            | 0.69251800                  | 0.57160100  | -0.02874200 |
| N                                            | -0.63186100                 | 0.35983000  | -0.04301800 |
| N                                            | -0.83031300                 | -0.99143200 | -0.00576100 |
| C                                            | 0.34612400                  | -1.62639600 | 0.03003400  |
| C                                            | 2.58225200                  | 1.76453500  | -0.03831100 |
| C                                            | 2.81309700                  | -0.70887400 | 0.03829900  |
| H                                            | -1.73578100                 | 1.27470500  | 0.01426600  |
| H                                            | 0.40195900                  | -2.70625600 | 0.06536100  |
| H                                            | 3.15314700                  | 2.69020600  | -0.05839100 |
| H                                            | 4.34620300                  | 0.67792500  | 0.02171400  |
| H                                            | -2.65139500                 | 2.51297900  | -0.66932500 |
| O                                            | -2.65301800                 | 1.88993000  | 0.07457300  |
| H                                            | -3.65260300                 | 1.11668600  | 0.06326700  |
| H                                            | -4.97749700                 | 0.34702200  | 0.90703100  |
| O                                            | -4.48481800                 | 0.30242900  | 0.07145500  |
| H                                            | -3.94534100                 | -0.71048100 | -0.00035100 |
| H                                            | -2.13838100                 | -1.47639900 | -0.04826600 |
| O                                            | -3.22699500                 | -1.77265200 | -0.07289500 |
| H                                            | -3.40101000                 | -2.25728200 | -0.89524600 |
| O                                            | 3.57085300                  | -1.67225500 | 0.07563700  |
| N                                            | 3.33376300                  | 0.61361700  | 0.00806600  |
| N                                            | 1.28688200                  | 1.81369100  | -0.05939500 |

**T2-3w**

|                                              |                             |             |             |
|----------------------------------------------|-----------------------------|-------------|-------------|
| Zero-point correction=                       | 0.175705 (Hartree/Particle) |             |             |
| Thermal correction to Energy=                | 0.190703                    |             |             |
| Thermal correction to Enthalpy=              | 0.191647                    |             |             |
| Thermal correction to Gibbs Free Energy=     | 0.132253                    |             |             |
| Sum of electronic and zero-point Energies=   | -716.336943                 |             |             |
| Sum of electronic and thermal Energies=      | -716.321945                 |             |             |
| Sum of electronic and thermal Enthalpies=    | -716.321001                 |             |             |
| Sum of electronic and thermal Free Energies= | -716.380395                 |             |             |
| C                                            | 1.45992300                  | -0.66773500 | 0.01510000  |
| C                                            | 0.76117800                  | 0.57167400  | -0.06622800 |
| N                                            | -0.56115900                 | 0.37387300  | -0.10840600 |
| N                                            | -0.70405400                 | -0.97373500 | -0.05397900 |
| C                                            | 0.46196500                  | -1.63857500 | 0.02031300  |
| C                                            | 2.64881000                  | 1.77252400  | -0.04714900 |
| C                                            | 2.90367100                  | -0.69441200 | 0.07338500  |
| H                                            | -1.65880500                 | -1.37632400 | -0.08756500 |
| H                                            | 0.50741900                  | -2.71705800 | 0.07208100  |
| H                                            | 3.21441400                  | 2.70130500  | -0.06714200 |
| H                                            | 4.42279300                  | 0.70344100  | 0.07288900  |
| H                                            | -5.29878000                 | 0.37748700  | 1.01342100  |
| O                                            | -4.83514700                 | 0.25575100  | 0.17167800  |
| H                                            | -4.17210600                 | 0.99341200  | 0.11303200  |
| H                                            | -2.78259400                 | 2.76101400  | -0.62587200 |
| O                                            | -2.83078100                 | 2.08458000  | 0.06560400  |
| H                                            | -1.98945200                 | 1.56493500  | 0.00105000  |
| H                                            | -3.93821500                 | -1.20772300 | 0.00624800  |
| O                                            | -3.31615700                 | -1.97276200 | -0.12832400 |
| H                                            | -3.64028200                 | -2.44250300 | -0.91098200 |
| O                                            | 3.65768700                  | -1.65638000 | 0.14498900  |
| N                                            | 1.35609400                  | 1.81407100  | -0.10043700 |
| N                                            | 3.41162000                  | 0.62745400  | 0.03549800  |

## S2. Cartesian coordinates of stepwise mechanisms.

### T1-RC

Zero-point correction= 0.140844 (Hartree/Particle)  
Thermal correction to Energy= 0.159527  
Thermal correction to Enthalpy= 0.160471  
Thermal correction to Gibbs Free Energy= 0.088058  
Sum of electronic and zero-point Energies= -1977.940154  
Sum of electronic and thermal Energies= -1977.921471  
Sum of electronic and thermal Enthalpies= -1977.920526  
Sum of electronic and thermal Free Energies= -1977.992939

|    |             |             |             |
|----|-------------|-------------|-------------|
| Mo | -2.17767100 | -0.70302800 | -0.17150200 |
| S  | -3.84047900 | 0.85120100  | 0.93453500  |
| S  | -1.44077500 | 1.53371800  | -1.10693900 |
| S  | -2.33954100 | -1.87307500 | 1.70389700  |
| C  | -3.66875500 | 2.42771800  | 0.17761800  |
| H  | -4.39248300 | 3.18450900  | 0.48146000  |
| C  | -2.65327400 | 2.72197600  | -0.65863900 |
| H  | -2.52246400 | 3.72557600  | -1.06336700 |
| O  | -3.19702000 | -1.43597800 | -1.34041800 |
| O  | -0.43563800 | -1.11073100 | -0.76675100 |
| H  | 0.51187500  | -0.79828300 | -0.58937400 |
| C  | 4.43357200  | 0.90262100  | 0.49139500  |
| C  | 4.52573500  | -0.35478400 | -0.12352800 |
| C  | 3.29522700  | -1.00629500 | -0.55520800 |
| C  | 2.22438400  | 0.93184000  | 0.31174500  |
| N  | 5.71651700  | 1.27243100  | 0.78707300  |
| H  | 6.40808500  | -1.52425200 | -0.53867900 |
| O  | 3.26072200  | -2.11464100 | -1.11750900 |
| N  | 2.14069900  | -0.26336600 | -0.28087100 |
| N  | 3.30999000  | 1.60559200  | 0.73765200  |
| H  | 1.27100200  | 1.43637700  | 0.46541500  |
| C  | 5.91395700  | -0.64468000 | -0.14600200 |
| N  | 6.64029400  | 0.33011800  | 0.40161800  |
| H  | 6.01680300  | 2.12074700  | 1.23854900  |

### T1-TS1

Zero-point correction= 0.137511 (Hartree/Particle)  
Thermal correction to Energy= 0.155739  
Thermal correction to Enthalpy= 0.156683  
Thermal correction to Gibbs Free Energy= 0.085963  
Sum of electronic and zero-point Energies= -1977.939836  
Sum of electronic and thermal Energies= -1977.921608  
Sum of electronic and thermal Enthalpies= -1977.920664  
Sum of electronic and thermal Free Energies= -1977.991385

|    |             |             |             |
|----|-------------|-------------|-------------|
| Mo | -2.06179300 | -0.70171500 | -0.21053500 |
| S  | -3.83349700 | 0.75614800  | 0.95337400  |
| S  | -1.42158400 | 1.66039600  | -1.01869200 |
| S  | -2.33071400 | -2.02732800 | 1.56865800  |
| C  | -3.70817300 | 2.37645600  | 0.28271400  |
| H  | -4.46355200 | 3.09206300  | 0.61189300  |
| C  | -2.69942700 | 2.76203700  | -0.52757800 |
| H  | -2.61908400 | 3.79215300  | -0.87719600 |
| O  | -2.98328900 | -1.37675500 | -1.49991800 |
| O  | -0.30878500 | -0.95171000 | -0.65008400 |
| H  | 0.90175100  | -0.68449600 | -0.47614100 |
| C  | 4.30809600  | 0.92540100  | 0.44942800  |
| C  | 4.41771000  | -0.36248100 | -0.09138600 |
| C  | 3.20412100  | -1.05860600 | -0.48993000 |
| C  | 2.09911000  | 0.94806800  | 0.27797300  |
| N  | 5.58207600  | 1.32746700  | 0.72535100  |
| H  | 6.31565400  | -1.53063800 | -0.43442200 |
| O  | 3.16299700  | -2.18884900 | -0.98778800 |
| N  | 2.05175100  | -0.29085200 | -0.24800800 |
| N  | 3.17544500  | 1.63548100  | 0.65626700  |
| H  | 1.12844000  | 1.42906900  | 0.38549800  |
| C  | 5.80907000  | -0.63681500 | -0.09477100 |
| N  | 6.51715700  | 0.37861400  | 0.39736900  |
| H  | 5.86939800  | 2.20561300  | 1.12618200  |

### T1-IM1

|                                              |                             |             |             |
|----------------------------------------------|-----------------------------|-------------|-------------|
| Zero-point correction=                       | 0.141323 (Hartree/Particle) |             |             |
| Thermal correction to Energy=                | 0.159903                    |             |             |
| Thermal correction to Enthalpy=              | 0.160848                    |             |             |
| Thermal correction to Gibbs Free Energy=     | 0.088546                    |             |             |
| Sum of electronic and zero-point Energies=   | -1977.936782                |             |             |
| Sum of electronic and thermal Energies=      | -1977.918201                |             |             |
| Sum of electronic and thermal Enthalpies=    | -1977.917257                |             |             |
| Sum of electronic and thermal Free Energies= | -1977.989558                |             |             |
| Mo                                           | 2.12864300                  | -0.67783300 | 0.26202300  |
| S                                            | 3.72222200                  | 0.85460900  | -1.04496600 |
| S                                            | 1.30558400                  | 1.72994700  | 0.96398000  |
| S                                            | 2.75143600                  | -2.18412300 | -1.28500800 |
| C                                            | 3.47002100                  | 2.51138300  | -0.49903700 |
| H                                            | 4.14941800                  | 3.25738100  | -0.91575000 |
| C                                            | 2.46704600                  | 2.88165700  | 0.32610900  |
| H                                            | 2.32283300                  | 3.92942000  | 0.59532400  |
| O                                            | 2.94753100                  | -1.11608700 | 1.71845100  |
| O                                            | 0.37923700                  | -1.01155000 | 0.48223500  |
| H                                            | -1.10645500                 | -0.81487900 | 0.33834600  |
| C                                            | -4.33316500                 | 0.91363000  | -0.31525200 |
| C                                            | -4.46095900                 | -0.44851500 | -0.01409800 |
| C                                            | -3.26256200                 | -1.21887600 | 0.26738700  |
| C                                            | -2.12377800                 | 0.90811900  | -0.11980400 |
| N                                            | -5.59839900                 | 1.37063000  | -0.52968200 |
| H                                            | -6.37314200                 | -1.63931000 | 0.09412400  |
| O                                            | -3.21888600                 | -2.41619100 | 0.55364900  |
| N                                            | -2.11016600                 | -0.41353500 | 0.17693000  |
| N                                            | -3.19355100                 | 1.64393700  | -0.37974200 |
| H                                            | -1.14061600                 | 1.37971800  | -0.11971700 |
| C                                            | -5.85426200                 | -0.70523300 | -0.07501200 |
| N                                            | -6.54466000                 | 0.38994700  | -0.38615100 |
| H                                            | -5.87260500                 | 2.31047100  | -0.76732800 |

### T1-IM1' (O-Up)

|                                              |                             |             |             |
|----------------------------------------------|-----------------------------|-------------|-------------|
| Zero-point correction=                       | 0.142189 (Hartree/Particle) |             |             |
| Thermal correction to Energy=                | 0.160817                    |             |             |
| Thermal correction to Enthalpy=              | 0.161761                    |             |             |
| Thermal correction to Gibbs Free Energy=     | 0.089620                    |             |             |
| Sum of electronic and zero-point Energies=   | -1977.933300                |             |             |
| Sum of electronic and thermal Energies=      | -1977.914672                |             |             |
| Sum of electronic and thermal Enthalpies=    | -1977.913728                |             |             |
| Sum of electronic and thermal Free Energies= | -1977.985869                |             |             |
| Mo                                           | -1.95622200                 | 0.01638100  | 0.67370300  |
| S                                            | -3.31731900                 | 1.28364200  | -1.11440300 |
| S                                            | -3.35482800                 | -1.90342400 | -0.41224400 |
| S                                            | -0.60541500                 | 1.87102400  | 0.52588600  |
| C                                            | -4.53952200                 | 0.17427900  | -1.73236200 |
| H                                            | -5.26826100                 | 0.60046200  | -2.42462800 |
| C                                            | -4.56135600                 | -1.14406600 | -1.43740100 |
| H                                            | -5.31338100                 | -1.80130600 | -1.87829400 |
| O                                            | -2.80436500                 | 0.16562400  | 2.17405500  |
| O                                            | -0.76892600                 | -1.27539300 | 0.81738500  |
| C                                            | 4.36171800                  | -1.03795000 | -0.08767000 |
| C                                            | 4.64582800                  | 0.31554000  | -0.31262800 |
| C                                            | 3.55930300                  | 1.27334800  | -0.25736600 |
| C                                            | 2.18399400                  | -0.71281300 | 0.22795700  |
| N                                            | 5.55062100                  | -1.69227200 | -0.19831700 |
| H                                            | 6.66105500                  | 1.22218200  | -0.76568800 |
| O                                            | 3.64201900                  | 2.49046500  | -0.42457400 |
| N                                            | 2.33807100                  | 0.62625000  | 0.02424100  |
| N                                            | 3.16059200                  | -1.60206900 | 0.18638500  |
| H                                            | 1.15855400                  | -1.03507500 | 0.43698000  |
| C                                            | 6.04319400                  | 0.36079000  | -0.55006000 |
| N                                            | 6.59249300                  | -0.84978800 | -0.48256400 |
| H                                            | 5.70880100                  | -2.68258400 | -0.10045900 |
| H                                            | 1.45434300                  | 1.19324600  | 0.10277900  |

### T1-TS2 (O-Up)

|                                              |                             |             |             |
|----------------------------------------------|-----------------------------|-------------|-------------|
| Zero-point correction=                       | 0.141916 (Hartree/Particle) |             |             |
| Thermal correction to Energy=                | 0.159669                    |             |             |
| Thermal correction to Enthalpy=              | 0.160613                    |             |             |
| Thermal correction to Gibbs Free Energy=     | 0.092838                    |             |             |
| Sum of electronic and zero-point Energies=   | -1977.911250                |             |             |
| Sum of electronic and thermal Energies=      | -1977.893497                |             |             |
| Sum of electronic and thermal Enthalpies=    | -1977.892553                |             |             |
| Sum of electronic and thermal Free Energies= | -1977.960328                |             |             |
| Mo                                           | 1.50604400                  | -0.42951700 | 0.15664200  |
| S                                            | 3.97297800                  | -0.17544900 | -0.46545200 |
| S                                            | 1.85499600                  | 2.05593900  | 0.58960200  |
| S                                            | 1.43375200                  | -2.05078600 | -1.37930400 |
| C                                            | 4.46510000                  | 1.42369600  | 0.07994700  |
| H                                            | 5.52732200                  | 1.65567600  | -0.00816900 |
| C                                            | 3.58601400                  | 2.34952800  | 0.51784100  |
| H                                            | 3.92044700                  | 3.34785600  | 0.80301500  |
| O                                            | 1.57391500                  | -1.19546300 | 1.69564800  |
| O                                            | -0.23646600                 | 0.17913400  | -0.05416800 |
| C                                            | -3.45068100                 | 0.62705400  | -0.83837400 |
| C                                            | -4.02026900                 | 0.08624100  | 0.34025300  |
| C                                            | -3.33387700                 | -1.00624800 | 0.97938300  |
| C                                            | -1.56826000                 | -0.61709900 | -0.77568300 |
| N                                            | -4.34684400                 | 1.57576500  | -1.25559900 |
| H                                            | -5.96080100                 | 0.67002800  | 1.32286000  |
| O                                            | -3.69737700                 | -1.64478800 | 1.98428700  |
| N                                            | -2.16915000                 | -1.34153000 | 0.29156800  |
| N                                            | -2.32881300                 | 0.28364100  | -1.46812300 |
| H                                            | -0.91689000                 | -1.25848400 | -1.38459900 |
| C                                            | -5.23353200                 | 0.79071700  | 0.52946300  |
| N                                            | -5.44046400                 | 1.69966600  | -0.41995500 |
| H                                            | -4.22300100                 | 2.21394800  | -2.02423400 |
| H                                            | -1.57917900                 | -2.02175500 | 0.75627100  |

### T1-IM2 (O-Up)

|                                              |                             |             |             |
|----------------------------------------------|-----------------------------|-------------|-------------|
| Zero-point correction=                       | 0.142244 (Hartree/Particle) |             |             |
| Thermal correction to Energy=                | 0.160427                    |             |             |
| Thermal correction to Enthalpy=              | 0.161371                    |             |             |
| Thermal correction to Gibbs Free Energy=     | 0.092700                    |             |             |
| Sum of electronic and zero-point Energies=   | -1977.911800                |             |             |
| Sum of electronic and thermal Energies=      | -1977.893617                |             |             |
| Sum of electronic and thermal Enthalpies=    | -1977.892673                |             |             |
| Sum of electronic and thermal Free Energies= | -1977.961344                |             |             |
| Mo                                           | 1.51890800                  | -0.44588900 | 0.13751400  |
| S                                            | 3.96552500                  | -0.11680300 | -0.43254000 |
| S                                            | 1.75578400                  | 2.03719900  | 0.58239900  |
| S                                            | 1.46790600                  | -2.02087700 | -1.42542300 |
| C                                            | 4.39757300                  | 1.48916900  | 0.14557800  |
| H                                            | 5.45508200                  | 1.74922400  | 0.09119400  |
| C                                            | 3.47839300                  | 2.38337800  | 0.56399100  |
| H                                            | 3.77293600                  | 3.38825400  | 0.86835300  |
| O                                            | 1.58978500                  | -1.23988000 | 1.65731300  |
| O                                            | -0.28368900                 | 0.11708600  | -0.09478000 |
| C                                            | -3.40799200                 | 0.60706800  | -0.84255200 |
| C                                            | -3.99331500                 | 0.08722800  | 0.34516700  |
| C                                            | -3.30984200                 | -0.98446100 | 1.01910600  |
| C                                            | -1.47722900                 | -0.60366000 | -0.70713600 |
| N                                            | -4.32294600                 | 1.52763400  | -1.29929200 |
| H                                            | -5.95489300                 | 0.66313400  | 1.28481500  |
| O                                            | -3.68830700                 | -1.59936800 | 2.03752000  |
| N                                            | -2.13757500                 | -1.33598900 | 0.36063600  |
| N                                            | -2.27573300                 | 0.28011800  | -1.44213700 |
| H                                            | -0.94702200                 | -1.32347700 | -1.35851700 |
| C                                            | -5.21837400                 | 0.77775700  | 0.49837700  |
| N                                            | -5.42972500                 | 1.66064000  | -0.47453000 |
| H                                            | -4.18380400                 | 2.17092200  | -2.06069200 |
| H                                            | -1.55960500                 | -2.00141500 | 0.85992400  |

**T1-TS3 (O-Up)**

Zero-point correction= 0.138398 (Hartree/Particle)  
 Thermal correction to Energy= 0.155637  
 Thermal correction to Enthalpy= 0.156581  
 Thermal correction to Gibbs Free Energy= 0.091345  
 Sum of electronic and zero-point Energies= -1977.908653  
 Sum of electronic and thermal Energies= -1977.891414  
 Sum of electronic and thermal Enthalpies= -1977.890469  
 Sum of electronic and thermal Free Energies= -1977.955706

|    |             |             |             |
|----|-------------|-------------|-------------|
| Mo | -1.59172600 | -0.42445900 | -0.10301800 |
| S  | -3.79044700 | -0.34557300 | 1.05583100  |
| S  | -2.48715300 | 1.64212800  | -1.18878100 |
| S  | -0.58543300 | -1.19228500 | 1.77893600  |
| C  | -4.74306200 | 0.83807100  | 0.15058600  |
| H  | -5.79918500 | 0.90817200  | 0.41375100  |
| C  | -4.20232800 | 1.66086500  | -0.77139900 |
| H  | -4.81343900 | 2.40732400  | -1.28015100 |
| O  | -1.68524100 | -1.72885300 | -1.20829800 |
| O  | 0.16755700  | 0.44155300  | -0.41327000 |
| C  | 3.48189500  | 0.97166300  | 0.43329700  |
| C  | 4.18398200  | -0.08288900 | -0.20969200 |
| C  | 3.40834700  | -1.13059100 | -0.82887400 |
| C  | 1.39041200  | 0.10366800  | 0.14322600  |
| N  | 4.46877200  | 1.82109500  | 0.87453700  |
| H  | 6.40734600  | -0.30905700 | -0.45993400 |
| O  | 3.84529100  | -2.10696000 | -1.47015500 |
| N  | 2.05094800  | -0.92129400 | -0.65583500 |
| N  | 2.18032300  | 1.15401800  | 0.59339400  |
| H  | 0.92272300  | -0.50819600 | 1.15904600  |
| C  | 5.55307000  | 0.24642800  | -0.09234700 |
| N  | 5.74544300  | 1.39225600  | 0.55955300  |
| H  | 4.33286400  | 2.68120600  | 1.37924800  |
| H  | 1.43758500  | -1.63222300 | -1.03753300 |

**T1-PC (O-Up)**

Zero-point correction= 0.140605 (Hartree/Particle)  
 Thermal correction to Energy= 0.158939  
 Thermal correction to Enthalpy= 0.159883  
 Thermal correction to Gibbs Free Energy= 0.091498  
 Sum of electronic and zero-point Energies= -1977.960906  
 Sum of electronic and thermal Energies= -1977.942572  
 Sum of electronic and thermal Enthalpies= -1977.941628  
 Sum of electronic and thermal Free Energies= -1978.010013

|    |             |             |             |
|----|-------------|-------------|-------------|
| Mo | -1.58567700 | 0.29125400  | 0.19326300  |
| S  | -4.01102400 | 0.34721700  | 0.34246000  |
| S  | -1.94977200 | -1.85484500 | -0.87761300 |
| S  | -1.68084400 | 2.64887100  | -0.48566300 |
| C  | -4.52531400 | -1.29527900 | -0.10452800 |
| H  | -5.58395200 | -1.52515600 | 0.02522600  |
| C  | -3.67616400 | -2.20385800 | -0.62298000 |
| H  | -4.01726200 | -3.19735900 | -0.91587000 |
| O  | -1.01961500 | 0.08075100  | 1.79644800  |
| O  | 0.34506900  | 0.32518200  | -0.85062400 |
| C  | 3.76346000  | -0.01014800 | -0.88269600 |
| C  | 4.12392900  | -0.25820500 | 0.45880800  |
| C  | 3.06938100  | -0.31060400 | 1.44065400  |
| C  | 1.54681400  | 0.14689500  | -0.50880500 |
| N  | 4.94390700  | -0.01445500 | -1.57349000 |
| H  | 6.19299500  | -0.59167600 | 1.28522300  |
| O  | 3.18875300  | -0.51274700 | 2.65810300  |
| N  | 1.81785000  | -0.09706200 | 0.85112500  |
| N  | 2.55270500  | 0.19285500  | -1.41276400 |
| H  | -0.41206500 | 2.79969100  | -0.94305400 |
| C  | 5.53374400  | -0.39439300 | 0.44924900  |
| N  | 6.04244200  | -0.25040500 | -0.77154100 |
| H  | 5.05895300  | 0.12523800  | -2.56385400 |
| H  | 0.99889300  | -0.11175400 | 1.46539300  |

**T1-IM1' (O-Down)**

Zero-point correction= 0.142189 (Hartree/Particle)  
 Thermal correction to Energy= 0.160818  
 Thermal correction to Enthalpy= 0.161762  
 Thermal correction to Gibbs Free Energy= 0.089616  
 Sum of electronic and zero-point Energies= -1977.933300  
 Sum of electronic and thermal Energies= -1977.914672  
 Sum of electronic and thermal Enthalpies= -1977.913727  
 Sum of electronic and thermal Free Energies= -1977.985873

|    |             |             |             |
|----|-------------|-------------|-------------|
| Mo | -1.95597600 | 0.01673100  | 0.67318700  |
| S  | -3.31890200 | 1.28326300  | -1.11404900 |
| S  | -3.35559600 | -1.90359400 | -0.41060800 |
| S  | -0.60521000 | 1.87119600  | 0.52338000  |
| C  | -4.54157200 | 0.17355400  | -1.73047900 |
| H  | -5.27096200 | 0.59944100  | -2.42223900 |
| C  | -4.56305700 | -1.14467900 | -1.43498700 |
| H  | -5.31546000 | -1.80211400 | -1.87494600 |
| O  | -2.80289800 | 0.16663800  | 2.17415800  |
| O  | -0.76865700 | -1.27506600 | 0.81647300  |
| C  | 4.36200000  | -1.03818100 | -0.08816000 |
| C  | 4.64652100  | 0.31540800  | -0.31201000 |
| C  | 3.56015900  | 1.27339400  | -0.25669700 |
| C  | 2.18418600  | -0.71282900 | 0.22659800  |
| N  | 5.55080900  | -1.69268600 | -0.19871600 |
| H  | 6.66217500  | 1.22192700  | -0.76342100 |
| O  | 3.64318000  | 2.49060200  | -0.42309300 |
| N  | 2.33866100  | 0.62634600  | 0.02387100  |
| N  | 3.16062000  | -1.60224500 | 0.18489400  |
| H  | 1.15857800  | -1.03496200 | 0.43502600  |
| C  | 6.04401600  | 0.36051800  | -0.54871600 |
| N  | 6.59301200  | -0.85022800 | -0.48180200 |
| H  | 1.45500700  | 1.19340600  | 0.10209900  |
| H  | 5.70875300  | -2.68307700 | -0.10127300 |

**T1-TS2 (O-Down)**

Zero-point correction= 0.142101 (Hartree/Particle)  
 Thermal correction to Energy= 0.159794  
 Thermal correction to Enthalpy= 0.160738  
 Thermal correction to Gibbs Free Energy= 0.093335  
 Sum of electronic and zero-point Energies= -1977.910968  
 Sum of electronic and thermal Energies= -1977.893275  
 Sum of electronic and thermal Enthalpies= -1977.892331  
 Sum of electronic and thermal Free Energies= -1977.959734

|    |             |             |             |
|----|-------------|-------------|-------------|
| Mo | -1.55686400 | -0.54733900 | -0.33387000 |
| S  | -3.85862900 | 0.00397300  | 0.64421700  |
| S  | -1.66365300 | 1.95601100  | -0.75146500 |
| S  | -1.44603900 | -2.13315300 | 1.24153900  |
| C  | -4.23415000 | 1.64281100  | 0.12526500  |
| H  | -5.23805000 | 2.00263600  | 0.35492000  |
| C  | -3.32361600 | 2.45305000  | -0.45484200 |
| H  | -3.57440700 | 3.48200400  | -0.71556100 |
| O  | -1.97484700 | -1.29299100 | -1.82560100 |
| O  | 0.25862800  | -0.16492100 | -0.40106600 |
| C  | 3.57495600  | -0.48657000 | -0.56643700 |
| C  | 3.92303800  | 0.55241100  | 0.33051000  |
| C  | 3.04720600  | 0.80017700  | 1.44672300  |
| C  | 1.57978600  | -0.94547200 | 0.37965200  |
| N  | 4.61380000  | -0.54192800 | -1.45770800 |
| H  | 5.76782300  | 1.84352300  | 0.28878800  |
| O  | 3.20856200  | 1.62013900  | 2.36889700  |
| N  | 1.95307100  | -0.06222700 | 1.42759100  |
| N  | 2.51458600  | -1.29326500 | -0.55361500 |
| H  | 0.93748600  | -1.75557300 | 0.74861700  |
| C  | 5.16876700  | 1.04370400  | -0.12871100 |
| N  | 5.59438600  | 0.40019600  | -1.21272800 |
| H  | 1.24125000  | 0.12780000  | 2.12245900  |
| H  | 4.66174800  | -1.11937200 | -2.28091500 |



**T1-IM2 (O-Down)**

|                                              |                             |             |             |
|----------------------------------------------|-----------------------------|-------------|-------------|
| Zero-point correction=                       | 0.142345 (Hartree/Particle) |             |             |
| Thermal correction to Energy=                | 0.160469                    |             |             |
| Thermal correction to Enthalpy=              | 0.161413                    |             |             |
| Thermal correction to Gibbs Free Energy=     | 0.093059                    |             |             |
| Sum of electronic and zero-point Energies=   | -1977.911867                |             |             |
| Sum of electronic and thermal Energies=      | -1977.893743                |             |             |
| Sum of electronic and thermal Enthalpies=    | -1977.892799                |             |             |
| Sum of electronic and thermal Free Energies= | -1977.961153                |             |             |
| Mo                                           | -1.56311100                 | -0.56579200 | -0.29016200 |
| S                                            | -3.87777600                 | 0.02557300  | 0.56365400  |
| S                                            | -1.59208500                 | 1.91086300  | -0.76915900 |
| S                                            | -1.46600000                 | -2.05670100 | 1.35398900  |
| C                                            | -4.21168400                 | 1.64785100  | -0.03241500 |
| H                                            | -5.22447800                 | 2.01921500  | 0.12700400  |
| C                                            | -3.26138800                 | 2.43132100  | -0.58306100 |
| H                                            | -3.48511600                 | 3.45311300  | -0.89077400 |
| O                                            | -1.94008000                 | -1.37209200 | -1.75596000 |
| O                                            | 0.31021600                  | -0.21947400 | -0.31971400 |
| C                                            | 3.52815500                  | -0.54876600 | -0.52866000 |
| C                                            | 3.91187400                  | 0.56264500  | 0.27183300  |
| C                                            | 3.04491600                  | 0.94275700  | 1.35641900  |
| C                                            | 1.47329300                  | -0.83365500 | 0.42722500  |
| N                                            | 4.58465700                  | -0.72848100 | -1.39162200 |
| H                                            | 5.80378400                  | 1.77258800  | 0.13966700  |
| O                                            | 3.24006200                  | 1.84366400  | 2.19828900  |
| N                                            | 1.92521900                  | 0.12461000  | 1.42341300  |
| N                                            | 2.44412600                  | -1.30416900 | -0.46706900 |
| H                                            | 0.95352100                  | -1.65895400 | 0.95052400  |
| C                                            | 5.17987500                  | 0.95979300  | -0.21263000 |
| N                                            | 5.59795000                  | 0.20305700  | -1.22462300 |
| H                                            | 1.23093000                  | 0.41305400  | 2.10140000  |
| H                                            | 4.61029900                  | -1.36509000 | -2.17065300 |

**T1-TS3 (O-Down)**

|                                              |                             |             |             |
|----------------------------------------------|-----------------------------|-------------|-------------|
| Zero-point correction=                       | 0.138187 (Hartree/Particle) |             |             |
| Thermal correction to Energy=                | 0.155497                    |             |             |
| Thermal correction to Enthalpy=              | 0.156441                    |             |             |
| Thermal correction to Gibbs Free Energy=     | 0.090898                    |             |             |
| Sum of electronic and zero-point Energies=   | -1977.908546                |             |             |
| Sum of electronic and thermal Energies=      | -1977.891236                |             |             |
| Sum of electronic and thermal Enthalpies=    | -1977.890292                |             |             |
| Sum of electronic and thermal Free Energies= | -1977.955835                |             |             |
| Mo                                           | -1.62925800                 | -0.60282900 | -0.15387200 |
| S                                            | -3.71874400                 | -0.14109300 | 1.11599700  |
| S                                            | -2.35559000                 | 1.43641800  | -1.40145700 |
| S                                            | -0.58922800                 | -1.23342600 | 1.76500000  |
| C                                            | -4.59233800                 | 1.04491000  | 0.13811300  |
| H                                            | -5.61404300                 | 1.26618500  | 0.44935000  |
| C                                            | -4.02711800                 | 1.70041900  | -0.89644800 |
| H                                            | -4.58324300                 | 2.45838000  | -1.44911400 |
| O                                            | -1.97325700                 | -1.99478700 | -1.08427500 |
| O                                            | 0.19277100                  | 0.00353000  | -0.65827200 |
| C                                            | 3.59718700                  | -0.57080500 | -0.47759000 |
| C                                            | 4.11715100                  | 0.58090500  | 0.17095400  |
| C                                            | 3.17641000                  | 1.52027800  | 0.73264800  |
| C                                            | 1.39905300                  | -0.16502300 | -0.00579400 |
| N                                            | 4.70849200                  | -1.23545200 | -0.93872900 |
| H                                            | 6.27159000                  | 1.18823500  | 0.38728200  |
| O                                            | 3.44220400                  | 2.59720700  | 1.30317500  |
| N                                            | 1.87162600                  | 1.09992700  | 0.54418400  |
| N                                            | 2.34259000                  | -0.96282300 | -0.64001200 |
| H                                            | 0.92992600                  | -0.80586700 | 0.99867400  |
| C                                            | 5.52031200                  | 0.49488600  | 0.02911500  |
| N                                            | 5.89703300                  | -0.59497400 | -0.63823500 |
| H                                            | 1.15135800                  | 1.69494000  | 0.93440900  |
| H                                            | 4.71437000                  | -2.10118600 | -1.45209000 |

**T1-PC (O-Down)**

|                                              |                             |             |             |
|----------------------------------------------|-----------------------------|-------------|-------------|
| Zero-point correction=                       | 0.140513 (Hartree/Particle) |             |             |
| Thermal correction to Energy=                | 0.158933                    |             |             |
| Thermal correction to Enthalpy=              | 0.159877                    |             |             |
| Thermal correction to Gibbs Free Energy=     | 0.091254                    |             |             |
| Sum of electronic and zero-point Energies=   | -1977.957033                |             |             |
| Sum of electronic and thermal Energies=      | -1977.938613                |             |             |
| Sum of electronic and thermal Enthalpies=    | -1977.937669                |             |             |
| Sum of electronic and thermal Free Energies= | -1978.006291                |             |             |
| Mo                                           | -1.81256200                 | -0.65170300 | -0.32727400 |
| S                                            | -3.68941400                 | 0.28634500  | 0.88664500  |
| S                                            | -1.42114200                 | 1.66491200  | -0.99887900 |
| S                                            | -1.43972100                 | -2.10628600 | 1.62603300  |
| C                                            | -3.80646000                 | 1.96801400  | 0.32306300  |
| H                                            | -4.67493900                 | 2.53276100  | 0.66539000  |
| C                                            | -2.85989200                 | 2.54975700  | -0.43837700 |
| H                                            | -2.93473300                 | 3.59358300  | -0.74310400 |
| O                                            | -2.49953900                 | -1.52746700 | -1.61662400 |
| O                                            | 0.34415300                  | -0.91408400 | -0.56586000 |
| C                                            | 3.75662000                  | -0.59719200 | -0.35427600 |
| C                                            | 3.97740600                  | 0.63101800  | 0.30386800  |
| C                                            | 2.82377100                  | 1.41372200  | 0.67113000  |
| C                                            | 1.50397900                  | -0.48365700 | -0.33314300 |
| N                                            | 5.00540900                  | -1.09912400 | -0.59577000 |
| H                                            | 5.95569700                  | 1.56507800  | 0.84098400  |
| O                                            | 2.81371400                  | 2.52302900  | 1.22372100  |
| N                                            | 1.63689800                  | 0.76079400  | 0.31621600  |
| N                                            | 2.60366800                  | -1.18735000 | -0.68836400 |
| H                                            | -0.20566400                 | -2.58554200 | 1.32783800  |
| C                                            | 5.38468500                  | 0.75744500  | 0.40058600  |
| N                                            | 6.01847900                  | -0.28153800 | -0.13673200 |
| H                                            | 0.77029000                  | 1.28421800  | 0.44305800  |
| H                                            | 5.22293300                  | -1.97405800 | -1.04389100 |

**T10-RC**

|                                              |                             |             |             |
|----------------------------------------------|-----------------------------|-------------|-------------|
| Zero-point correction=                       | 0.140731 (Hartree/Particle) |             |             |
| Thermal correction to Energy=                | 0.159389                    |             |             |
| Thermal correction to Enthalpy=              | 0.160333                    |             |             |
| Thermal correction to Gibbs Free Energy=     | 0.088722                    |             |             |
| Sum of electronic and zero-point Energies=   | -1977.930935                |             |             |
| Sum of electronic and thermal Energies=      | -1977.912277                |             |             |
| Sum of electronic and thermal Enthalpies=    | -1977.911333                |             |             |
| Sum of electronic and thermal Free Energies= | -1977.982944                |             |             |
| Mo                                           | -2.06856800                 | -0.30402300 | -0.66566300 |
| S                                            | -3.59127000                 | -0.61679400 | 1.32254500  |
| S                                            | -2.00444800                 | 2.00122700  | 0.33885100  |
| S                                            | -1.44290100                 | -2.39553000 | -0.26668100 |
| C                                            | -3.92224300                 | 0.97919900  | 1.97816400  |
| H                                            | -4.65793300                 | 1.02337600  | 2.78106500  |
| C                                            | -3.24388700                 | 2.07340400  | 1.58007800  |
| H                                            | -3.40919800                 | 3.04604000  | 2.04276800  |
| O                                            | -3.22940500                 | -0.30534200 | -1.92475600 |
| O                                            | -0.51099800                 | 0.41887400  | -1.48543800 |
| H                                            | 0.40735400                  | 0.57049200  | -1.11987500 |
| C                                            | 4.40809300                  | -0.67521400 | 0.71407400  |
| C                                            | 4.49990800                  | 0.48483000  | -0.08130100 |
| C                                            | 3.33213100                  | 1.05409500  | -0.71892200 |
| C                                            | 2.09081900                  | -0.72015000 | 0.27555900  |
| N                                            | 5.57443700                  | -1.07030400 | 1.22184300  |
| H                                            | 6.44285700                  | 1.56892400  | -0.45767000 |
| O                                            | 3.32245400                  | 2.06100500  | -1.43911400 |
| N                                            | 2.10874200                  | 0.35357500  | -0.46786100 |
| N                                            | 3.16930100                  | -1.27768000 | 0.88609000  |
| H                                            | 1.14438700                  | -1.23769200 | 0.42937300  |
| C                                            | 5.88813700                  | 0.75871200  | 0.00079900  |
| N                                            | 6.50796200                  | -0.15356300 | 0.76374600  |
| H                                            | 3.07304400                  | -2.11439700 | 1.44379400  |

### T10-TS1

|                                              |                             |             |             |
|----------------------------------------------|-----------------------------|-------------|-------------|
| Zero-point correction=                       | 0.137169 (Hartree/Particle) |             |             |
| Thermal correction to Energy=                | 0.155260                    |             |             |
| Thermal correction to Enthalpy=              | 0.156205                    |             |             |
| Thermal correction to Gibbs Free Energy=     | 0.086669                    |             |             |
| Sum of electronic and zero-point Energies=   | -1977.928175                |             |             |
| Sum of electronic and thermal Energies=      | -1977.910083                |             |             |
| Sum of electronic and thermal Enthalpies=    | -1977.909139                |             |             |
| Sum of electronic and thermal Free Energies= | -1977.978675                |             |             |
| Mo                                           | -1.88588600                 | -0.26324700 | -0.65680300 |
| S                                            | -3.60255700                 | -0.83055100 | 1.16082200  |
| S                                            | -2.28640700                 | 2.02189500  | 0.38799000  |
| S                                            | -1.18328700                 | -2.37551300 | -0.27480300 |
| C                                            | -4.22681600                 | 0.69508400  | 1.77054500  |
| H                                            | -5.05096400                 | 0.62925500  | 2.48218900  |
| C                                            | -3.67599200                 | 1.88565300  | 1.45337300  |
| H                                            | -4.04328600                 | 2.81369500  | 1.89274000  |
| O                                            | -2.86578400                 | -0.28321200 | -2.06988000 |
| O                                            | -0.32290300                 | 0.56384500  | -1.10900100 |
| H                                            | 0.88265100                  | 0.64934800  | -0.74610700 |
| C                                            | 4.35231600                  | -0.70092500 | 0.59309500  |
| C                                            | 4.38363900                  | 0.58535200  | 0.01404800  |
| C                                            | 3.19312300                  | 1.20867900  | -0.50933200 |
| C                                            | 2.03557500                  | -0.81102600 | 0.18583500  |
| N                                            | 5.53925000                  | -1.12324800 | 1.01723100  |
| H                                            | 6.27044700                  | 1.80639500  | -0.17219000 |
| O                                            | 3.10061800                  | 2.31221200  | -1.04733500 |
| N                                            | 2.01794400                  | 0.39113900  | -0.35528400 |
| N                                            | 3.14590900                  | -1.38990700 | 0.66717600  |
| H                                            | 1.09681100                  | -1.36803600 | 0.23359700  |
| C                                            | 5.75792700                  | 0.90384900  | 0.13753800  |
| N                                            | 6.42420400                  | -0.10004900 | 0.72517200  |
| H                                            | 3.10231600                  | -2.31589800 | 1.07041200  |

### T10-IM1

|                                              |                             |             |             |
|----------------------------------------------|-----------------------------|-------------|-------------|
| Zero-point correction=                       | 0.141986 (Hartree/Particle) |             |             |
| Thermal correction to Energy=                | 0.160419                    |             |             |
| Thermal correction to Enthalpy=              | 0.161363                    |             |             |
| Thermal correction to Gibbs Free Energy=     | 0.090818                    |             |             |
| Sum of electronic and zero-point Energies=   | -1977.926773                |             |             |
| Sum of electronic and thermal Energies=      | -1977.908340                |             |             |
| Sum of electronic and thermal Enthalpies=    | -1977.907396                |             |             |
| Sum of electronic and thermal Free Energies= | -1977.977941                |             |             |
| Mo                                           | 1.79726300                  | -0.15875000 | 0.52365300  |
| S                                            | 3.77986400                  | -1.20310100 | -0.75633100 |
| S                                            | 2.99972600                  | 1.92792400  | -0.36207600 |
| S                                            | 0.82694700                  | -2.18863400 | 0.07955900  |
| C                                            | 4.87352100                  | 0.11225000  | -1.16653200 |
| H                                            | 5.82114500                  | -0.17346700 | -1.62622200 |
| C                                            | 4.55386600                  | 1.41357900  | -0.99941600 |
| H                                            | 5.23761100                  | 2.20508100  | -1.30942700 |
| O                                            | 2.28766300                  | -0.19620400 | 2.17765100  |
| O                                            | 0.38557000                  | 0.91878000  | 0.39719400  |
| H                                            | -1.37843300                 | 1.36018500  | 0.24837400  |
| C                                            | -4.38698200                 | -0.79300300 | -0.28843900 |
| C                                            | -4.61874500                 | 0.59530900  | -0.14594300 |
| C                                            | -3.54286800                 | 1.52089200  | 0.06576300  |
| C                                            | -2.06865600                 | -0.46266300 | -0.02981500 |
| N                                            | -5.49778000                 | -1.49463200 | -0.47563200 |
| H                                            | -6.67349500                 | 1.51960900  | -0.22907400 |
| O                                            | -3.58076500                 | 2.74145300  | 0.20935800  |
| N                                            | -2.26862400                 | 0.84625400  | 0.10395700  |
| N                                            | -3.08774200                 | -1.29195200 | -0.22425900 |
| H                                            | -1.04902000                 | -0.87467900 | 0.02174600  |
| C                                            | -6.02737600                 | 0.65164800  | -0.27123600 |
| N                                            | -6.52988600                 | -0.57484600 | -0.46355300 |
| H                                            | -2.89554200                 | -2.28233800 | -0.32076700 |

### T10-TS2 (O-Down)

|                                              |                             |             |             |
|----------------------------------------------|-----------------------------|-------------|-------------|
| Zero-point correction=                       | 0.142003 (Hartree/Particle) |             |             |
| Thermal correction to Energy=                | 0.159632                    |             |             |
| Thermal correction to Enthalpy=              | 0.160577                    |             |             |
| Thermal correction to Gibbs Free Energy=     | 0.093032                    |             |             |
| Sum of electronic and zero-point Energies=   | -1977.912611                |             |             |
| Sum of electronic and thermal Energies=      | -1977.894981                |             |             |
| Sum of electronic and thermal Enthalpies=    | -1977.894037                |             |             |
| Sum of electronic and thermal Free Energies= | -1977.961581                |             |             |
| Mo                                           | -1.53786200                 | -0.49058500 | -0.26965700 |
| S                                            | -3.94603400                 | -0.26360100 | 0.56821300  |
| S                                            | -1.98471600                 | 1.95229900  | -0.76897400 |
| S                                            | -1.29354700                 | -2.01834100 | 1.36538800  |
| C                                            | -4.52317300                 | 1.29756500  | 0.00031400  |
| H                                            | -5.57758400                 | 1.51398800  | 0.17589300  |
| C                                            | -3.70927100                 | 2.21818000  | -0.55710200 |
| H                                            | -4.08726500                 | 3.19621000  | -0.85605600 |
| O                                            | -1.73724300                 | -1.33740200 | -1.75403500 |
| O                                            | 0.19015000                  | 0.14446000  | -0.24727800 |
| C                                            | 3.66262900                  | -0.55290000 | -0.57829300 |
| C                                            | 4.13235900                  | 0.54327500  | 0.18022100  |
| C                                            | 3.36687500                  | 1.06252300  | 1.26881100  |
| C                                            | 1.61421500                  | -0.62960900 | 0.65268100  |
| N                                            | 4.51270200                  | -0.92728300 | -1.52721400 |
| H                                            | 6.11143100                  | 1.56429100  | -0.19247200 |
| O                                            | 3.62926800                  | 1.99057100  | 2.04643600  |
| N                                            | 2.15680900                  | 0.33453300  | 1.46675600  |
| N                                            | 2.45108700                  | -1.16793500 | -0.27116500 |
| H                                            | 0.86910800                  | -1.29762200 | 1.11073600  |
| C                                            | 5.38414700                  | 0.79850900  | -0.43562300 |
| N                                            | 5.59890300                  | -0.06446300 | -1.43271600 |
| H                                            | 1.53373700                  | 0.73145700  | 2.15823700  |
| H                                            | 2.06894500                  | -1.85970100 | -0.90144500 |

### T10-IM2 (O-Down)

|                                              |                             |             |             |
|----------------------------------------------|-----------------------------|-------------|-------------|
| Zero-point correction=                       | 0.142812 (Hartree/Particle) |             |             |
| Thermal correction to Energy=                | 0.160639                    |             |             |
| Thermal correction to Enthalpy=              | 0.161583                    |             |             |
| Thermal correction to Gibbs Free Energy=     | 0.093691                    |             |             |
| Sum of electronic and zero-point Energies=   | -1977.917610                |             |             |
| Sum of electronic and thermal Energies=      | -1977.899784                |             |             |
| Sum of electronic and thermal Enthalpies=    | -1977.898840                |             |             |
| Sum of electronic and thermal Free Energies= | -1977.966732                |             |             |
| Mo                                           | -1.54227300                 | -0.53955400 | -0.27807900 |
| S                                            | -3.90168900                 | -0.01900300 | 0.43911800  |
| S                                            | -1.55444100                 | 1.93700000  | -0.63841400 |
| S                                            | -1.49598700                 | -2.06156600 | 1.33226100  |
| C                                            | -4.21522000                 | 1.62442600  | -0.10572200 |
| H                                            | -5.24172700                 | 1.97582900  | -0.00295500 |
| C                                            | -3.23681900                 | 2.43942200  | -0.54821800 |
| H                                            | -3.44488300                 | 3.47235400  | -0.82603500 |
| O                                            | -1.82001200                 | -1.31460100 | -1.78033400 |
| O                                            | 0.35600700                  | -0.18422100 | -0.21628200 |
| C                                            | 3.57924500                  | -0.57549500 | -0.56212600 |
| C                                            | 3.94967800                  | 0.53773600  | 0.22358600  |
| C                                            | 3.13791500                  | 0.96053200  | 1.32568200  |
| C                                            | 1.43898000                  | -0.78134500 | 0.57175900  |
| N                                            | 4.45905000                  | -0.83352000 | -1.52835700 |
| H                                            | 5.81812500                  | 1.75811800  | -0.11985600 |
| O                                            | 3.34393900                  | 1.89258100  | 2.12458500  |
| N                                            | 2.00229600                  | 0.14456800  | 1.51119100  |
| N                                            | 2.44487100                  | -1.33334500 | -0.27160100 |
| H                                            | 0.91224400                  | -1.58451100 | 1.12437500  |
| C                                            | 5.16804000                  | 0.93173900  | -0.38564500 |
| N                                            | 5.46121900                  | 0.12780200  | -1.41280000 |
| H                                            | 1.34128300                  | 0.52169000  | 2.17796700  |
| H                                            | 2.08183300                  | -1.89579900 | -1.03030600 |

**T10-TS3 (O-Down)**

|                                              |                             |             |             |
|----------------------------------------------|-----------------------------|-------------|-------------|
| Zero-point correction=                       | 0.138077 (Hartree/Particle) |             |             |
| Thermal correction to Energy=                | 0.155274                    |             |             |
| Thermal correction to Enthalpy=              | 0.156218                    |             |             |
| Thermal correction to Gibbs Free Energy=     | 0.090870                    |             |             |
| Sum of electronic and zero-point Energies=   | -1977.913281                |             |             |
| Sum of electronic and thermal Energies=      | -1977.896084                |             |             |
| Sum of electronic and thermal Enthalpies=    | -1977.895140                |             |             |
| Sum of electronic and thermal Free Energies= | -1977.960488                |             |             |
| Mo                                           | -1.60427100                 | -0.53257500 | -0.14312900 |
| S                                            | -3.71236300                 | -0.36031300 | 1.13383900  |
| S                                            | -2.53752000                 | 1.45026700  | -1.31254000 |
| S                                            | -0.47532200                 | -1.10453300 | 1.74882900  |
| C                                            | -4.71642600                 | 0.75694800  | 0.20037500  |
| H                                            | -5.75602200                 | 0.84650000  | 0.51620300  |
| C                                            | -4.22823400                 | 1.51135500  | -0.80442300 |
| H                                            | -4.86362300                 | 2.22165600  | -1.33336300 |
| O                                            | -1.77343800                 | -1.92431900 | -1.11974800 |
| O                                            | 0.16828200                  | 0.29108500  | -0.62821800 |
| C                                            | 3.64425100                  | -0.61540200 | -0.53790700 |
| C                                            | 4.20844500                  | 0.50364600  | 0.11717500  |
| C                                            | 3.37562100                  | 1.54980300  | 0.63611400  |
| C                                            | 1.38243000                  | 0.11038300  | -0.04036400 |
| N                                            | 4.56652700                  | -1.48231200 | -0.95448300 |
| H                                            | 6.42393700                  | 0.79246000  | 0.43030000  |
| O                                            | 3.71820000                  | 2.59976300  | 1.20805000  |
| N                                            | 2.00620400                  | 1.30685100  | 0.41533600  |
| N                                            | 2.27453200                  | -0.72858300 | -0.72813000 |
| H                                            | 0.95262600                  | -0.52853000 | 1.02455800  |
| C                                            | 5.59238200                  | 0.21081000  | 0.04882900  |
| N                                            | 5.79607700                  | -0.95277100 | -0.57963600 |
| H                                            | 1.37344300                  | 1.97787400  | 0.83151200  |
| H                                            | 1.89374200                  | -1.60833000 | -1.05092300 |

**T10-PC (O-Down)**

|                                              |                             |             |             |
|----------------------------------------------|-----------------------------|-------------|-------------|
| Zero-point correction=                       | 0.140243 (Hartree/Particle) |             |             |
| Thermal correction to Energy=                | 0.158549                    |             |             |
| Thermal correction to Enthalpy=              | 0.159493                    |             |             |
| Thermal correction to Gibbs Free Energy=     | 0.091089                    |             |             |
| Sum of electronic and zero-point Energies=   | -1977.959890                |             |             |
| Sum of electronic and thermal Energies=      | -1977.941584                |             |             |
| Sum of electronic and thermal Enthalpies=    | -1977.940640                |             |             |
| Sum of electronic and thermal Free Energies= | -1978.009044                |             |             |
| Mo                                           | 1.54850900                  | 0.16868900  | -0.30970400 |
| S                                            | 3.93368200                  | 0.10199000  | -0.70031100 |
| S                                            | 2.04319300                  | -1.34462200 | 1.51002500  |
| S                                            | 1.67135500                  | 2.59823800  | -0.59973000 |
| C                                            | 4.52100900                  | -1.21810900 | 0.33743100  |
| H                                            | 5.56513200                  | -1.50623900 | 0.21051800  |
| C                                            | 3.74525400                  | -1.80714900 | 1.26703100  |
| H                                            | 4.12795900                  | -2.59851100 | 1.91137500  |
| O                                            | 0.82264700                  | -0.65284100 | -1.62778300 |
| O                                            | -0.32604700                 | 0.64043400  | 0.80299700  |
| C                                            | -3.27210500                 | -0.58705400 | -0.78649700 |
| C                                            | -4.26478300                 | -0.16365700 | 0.13126600  |
| C                                            | -3.91800500                 | 0.54821400  | 1.31652400  |
| C                                            | -1.52051300                 | 0.35545100  | 0.53723100  |
| N                                            | -3.78128100                 | -1.23363200 | -1.82688500 |
| H                                            | -6.47285200                 | -0.54684100 | -0.14413500 |
| O                                            | -4.64114200                 | 0.99093200  | 2.22241900  |
| N                                            | -2.51201200                 | 0.75145100  | 1.41726900  |
| N                                            | -1.91740700                 | -0.32106400 | -0.56554100 |
| H                                            | 0.42904100                  | 2.94475300  | -0.17632200 |
| C                                            | -5.44918900                 | -0.63882300 | -0.48826600 |
| N                                            | -5.15825200                 | -1.26246100 | -1.63133600 |
| H                                            | -2.18645500                 | 1.24928500  | 2.23534200  |
| H                                            | -1.18290100                 | -0.61859000 | -1.21290000 |

**T10-TS2 (O-Up)**

|                                              |                             |             |             |
|----------------------------------------------|-----------------------------|-------------|-------------|
| Zero-point correction=                       | 0.142064 (Hartree/Particle) |             |             |
| Thermal correction to Energy=                | 0.159667                    |             |             |
| Thermal correction to Enthalpy=              | 0.160611                    |             |             |
| Thermal correction to Gibbs Free Energy=     | 0.093358                    |             |             |
| Sum of electronic and zero-point Energies=   | -1977.912547                |             |             |
| Sum of electronic and thermal Energies=      | -1977.894944                |             |             |
| Sum of electronic and thermal Enthalpies=    | -1977.894000                |             |             |
| Sum of electronic and thermal Free Energies= | -1977.961253                |             |             |
| Mo                                           | -1.55431100                 | -0.45846200 | -0.20162600 |
| S                                            | -3.93538600                 | -0.14153600 | 0.67650400  |
| S                                            | -1.96199100                 | 1.97047600  | -0.80266200 |
| S                                            | -1.30759800                 | -1.92823000 | 1.48487000  |
| C                                            | -4.49317800                 | 1.40689100  | 0.05632600  |
| H                                            | -5.53789100                 | 1.65379200  | 0.24867000  |
| C                                            | -3.67406400                 | 2.28427400  | -0.55988300 |
| H                                            | -4.03863200                 | 3.25702400  | -0.89105200 |
| O                                            | -1.79473100                 | -1.36427200 | -1.64466800 |
| O                                            | 0.18424500                  | 0.14802000  | -0.23395700 |
| C                                            | 3.52989400                  | 0.74593800  | 0.83201800  |
| C                                            | 4.16902200                  | 0.13991200  | -0.27278800 |
| C                                            | 3.56577500                  | -0.96185900 | -0.95401100 |
| C                                            | 1.61795800                  | -0.67292000 | 0.60662900  |
| N                                            | 4.24315800                  | 1.72997200  | 1.36685400  |
| H                                            | 6.18361400                  | 0.78777900  | -1.06039600 |
| O                                            | 3.98627600                  | -1.61907900 | -1.91621900 |
| N                                            | 2.32372200                  | -1.34079700 | -0.36477200 |
| N                                            | 2.30627200                  | 0.27091600  | 1.29873000  |
| H                                            | 0.86740000                  | -1.25902300 | 1.15792400  |
| C                                            | 5.37009100                  | 0.89002000  | -0.35173300 |
| N                                            | 5.40587500                  | 1.81746400  | 0.60939400  |
| H                                            | 1.81089700                  | -2.04878400 | -0.87555500 |
| H                                            | 1.80278600                  | 0.79950200  | 1.99729300  |

**T10-IM2 (O-Up)**

|                                              |                             |             |             |
|----------------------------------------------|-----------------------------|-------------|-------------|
| Zero-point correction=                       | 0.142812 (Hartree/Particle) |             |             |
| Thermal correction to Energy=                | 0.160652                    |             |             |
| Thermal correction to Enthalpy=              | 0.161597                    |             |             |
| Thermal correction to Gibbs Free Energy=     | 0.093742                    |             |             |
| Sum of electronic and zero-point Energies=   | -1977.917428                |             |             |
| Sum of electronic and thermal Energies=      | -1977.899588                |             |             |
| Sum of electronic and thermal Enthalpies=    | -1977.898644                |             |             |
| Sum of electronic and thermal Free Energies= | -1977.966498                |             |             |
| Mo                                           | -1.51883500                 | -0.45868700 | -0.15739600 |
| S                                            | -3.93949400                 | -0.05441000 | 0.38916300  |
| S                                            | -1.63650600                 | 2.02419900  | -0.53775800 |
| S                                            | -1.50885800                 | -2.02665800 | 1.40649100  |
| C                                            | -4.30313300                 | 1.57877600  | -0.15789800 |
| H                                            | -5.35076100                 | 1.87521200  | -0.11240000 |
| C                                            | -3.34228700                 | 2.44436700  | -0.53721600 |
| H                                            | -3.58634200                 | 3.46768000  | -0.82169300 |
| O                                            | -1.61218600                 | -1.24276300 | -1.67694900 |
| O                                            | 0.32990000                  | 0.05029300  | 0.09198200  |
| C                                            | 3.44971300                  | 0.63902000  | 0.87320200  |
| C                                            | 3.99910500                  | 0.11401000  | -0.31706500 |
| C                                            | 3.35682100                  | -0.96266000 | -1.00891700 |
| C                                            | 1.44688000                  | -0.72139900 | 0.65854000  |
| N                                            | 4.18751700                  | 1.62234700  | 1.38520000  |
| H                                            | 5.90887600                  | 0.86235700  | -1.26204300 |
| O                                            | 3.72544800                  | -1.54479900 | -2.04567800 |
| N                                            | 2.18891200                  | -1.41269000 | -0.35576900 |
| N                                            | 2.29824300                  | 0.10149500  | 1.44935800  |
| H                                            | 0.92241500                  | -1.45824400 | 1.29728100  |
| C                                            | 5.16668900                  | 0.90420900  | -0.47236700 |
| N                                            | 5.27194800                  | 1.78760500  | 0.52509700  |
| H                                            | 1.63951400                  | -2.05304700 | -0.91521200 |
| H                                            | 1.80072700                  | 0.70974000  | 2.08666200  |

### T10-TS3 (O-Up)

Zero-point correction= 0.138081 (Hartree/Particle)  
Thermal correction to Energy= 0.155274  
Thermal correction to Enthalpy= 0.156218  
Thermal correction to Gibbs Free Energy= 0.090908  
Sum of electronic and zero-point Energies= -1977.913080  
Sum of electronic and thermal Energies= -1977.895887  
Sum of electronic and thermal Enthalpies= -1977.894942  
Sum of electronic and thermal Free Energies= -1977.960253

|    |             |             |             |
|----|-------------|-------------|-------------|
| Mo | -1.61993200 | -0.47687600 | -0.08702600 |
| S  | -3.70874500 | -0.19281500 | 1.19987800  |
| S  | -2.51586800 | 1.47597000  | -1.33675900 |
| S  | -0.47715300 | -1.00933600 | 1.80691500  |
| C  | -4.69382600 | 0.91054500  | 0.22967200  |
| H  | -5.72632300 | 1.04309100  | 0.55345900  |
| C  | -4.19757000 | 1.60609300  | -0.81287200 |
| H  | -4.81992100 | 2.31009200  | -1.36531300 |
| O  | -1.82487000 | -1.90334800 | -1.00527200 |
| O  | 0.16150700  | 0.29626200  | -0.62123000 |
| C  | 3.53569200  | 1.08931300  | 0.32657600  |
| C  | 4.23879300  | -0.03399500 | -0.16651900 |
| C  | 3.53942900  | -1.14256900 | -0.74909700 |
| C  | 1.38419600  | 0.04352200  | -0.07775400 |
| N  | 4.34623100  | 2.01905200  | 0.83097400  |
| H  | 6.48478600  | -0.23791000 | -0.10483900 |
| O  | 4.01192500  | -2.18048500 | -1.24439800 |
| N  | 2.14260600  | -0.95671500 | -0.75127700 |
| N  | 2.15398300  | 1.17490500  | 0.23791400  |
| H  | 0.95462200  | -0.49249400 | 1.04208300  |
| C  | 5.58228300  | 0.32671800  | 0.10017300  |
| N  | 5.63931400  | 1.52937900  | 0.68358100  |
| H  | 1.60060100  | -1.75103600 | -1.06884400 |
| H  | 1.67421800  | 1.91240600  | 0.73576400  |

### T10-PC (O-Up)

Zero-point correction= 0.140236 (Hartree/Particle)  
Thermal correction to Energy= 0.158605  
Thermal correction to Enthalpy= 0.159549  
Thermal correction to Gibbs Free Energy= 0.091054  
Sum of electronic and zero-point Energies= -1977.959400  
Sum of electronic and thermal Energies= -1977.941031  
Sum of electronic and thermal Enthalpies= -1977.940087  
Sum of electronic and thermal Free Energies= -1978.008582

|    |             |             |             |
|----|-------------|-------------|-------------|
| Mo | -1.59592400 | 0.29320100  | 0.18929500  |
| S  | -4.00467800 | 0.34484100  | 0.39089100  |
| S  | -1.96677300 | -1.85354100 | -0.86045500 |
| S  | -1.70839800 | 2.61953800  | -0.57351900 |
| C  | -4.52572600 | -1.30132600 | -0.03717000 |
| H  | -5.57995800 | -1.53213800 | 0.11993600  |
| C  | -3.68767600 | -2.20866500 | -0.57313700 |
| H  | -4.02904000 | -3.20506100 | -0.85338800 |
| O  | -0.98850700 | 0.11493700  | 1.78169400  |
| O  | 0.37003900  | 0.29811800  | -0.86873200 |
| C  | 3.89859700  | -0.05454600 | -0.90681200 |
| C  | 4.18887400  | -0.24208100 | 0.46005400  |
| C  | 3.14735500  | -0.25733500 | 1.44278900  |
| C  | 1.54288200  | 0.12471500  | -0.45570000 |
| N  | 4.97950700  | -0.06698700 | -1.67723700 |
| H  | 6.27947400  | -0.53481900 | 1.26162700  |
| O  | 3.23733200  | -0.40837700 | 2.66530100  |
| N  | 1.85058500  | -0.06464100 | 0.86768800  |
| N  | 2.58472600  | 0.12278900  | -1.33724800 |
| H  | -0.43198900 | 2.78351500  | -1.00539600 |
| C  | 5.60200800  | -0.37309100 | 0.43136200  |
| N  | 6.05770400  | -0.27019500 | -0.81972200 |
| H  | 1.04635300  | -0.06263800 | 1.50167400  |
| H  | 2.36511000  | 0.25308400  | -2.31428000 |

### S3. Cartesian coordinates of concerted mechanisms of neutral allopurinol.

#### T1-RC (O-Down)

Zero-point correction= 0.154799 (Hartree/Particle)  
Thermal correction to Energy= 0.173966  
Thermal correction to Enthalpy= 0.174911  
Thermal correction to Gibbs Free Energy= 0.101757  
Sum of electronic and zero-point Energies= -1978.554709  
Sum of electronic and thermal Energies= -1978.535542  
Sum of electronic and thermal Enthalpies= -1978.534597  
Sum of electronic and thermal Free Energies= -1978.607751

|    |             |             |             |
|----|-------------|-------------|-------------|
| Mo | 2.11004800  | 0.05673300  | -0.70515800 |
| S  | 3.50839400  | -1.35854700 | 0.75632700  |
| C  | 4.36465800  | -0.29758100 | 1.86461200  |
| H  | 5.11118800  | -0.78076600 | 2.49149500  |
| C  | 4.06095900  | 1.00567600  | 1.99281000  |
| H  | 4.54810000  | 1.64569600  | 2.72480800  |
| S  | 2.80201000  | 1.74164700  | 1.01850300  |
| S  | 0.78404000  | -1.66455900 | -1.05012300 |
| O  | 0.74637900  | 1.48472600  | -0.88572600 |
| H  | 0.89940500  | 2.33701600  | -0.45622600 |
| C  | -2.24783300 | 0.55579600  | -0.41733900 |
| H  | -1.24309900 | 0.85981300  | -0.71571000 |
| N  | -3.24220200 | 1.40611600  | -0.51102400 |
| O  | 3.13719800  | 0.23008600  | -2.05561700 |
| C  | -3.55606000 | -1.33270200 | 0.51704600  |
| C  | -4.66122900 | -0.40687700 | 0.41948400  |
| C  | -4.42224300 | 0.87959600  | -0.08401800 |
| N  | -2.36267700 | -0.72088400 | 0.05701200  |
| H  | -1.51453300 | -1.29245200 | 0.05998700  |
| O  | -3.56446700 | -2.49089200 | 0.92364000  |
| C  | -6.05003100 | -0.43227200 | 0.71038100  |
| H  | -6.63941600 | -1.24259400 | 1.11643100  |
| N  | -5.62048800 | 1.51649700  | -0.06552800 |
| N  | -6.62651500 | 0.72844500  | 0.41732000  |
| H  | -5.81383000 | 2.46142500  | -0.36013400 |

#### T1-TS (O-Down)

Zero-point correction= 0.150390 (Hartree/Particle)  
Thermal correction to Energy= 0.168165  
Thermal correction to Enthalpy= 0.169109  
Thermal correction to Gibbs Free Energy= 0.102772  
Sum of electronic and zero-point Energies= -1978.489983  
Sum of electronic and thermal Energies= -1978.472209  
Sum of electronic and thermal Enthalpies= -1978.471264  
Sum of electronic and thermal Free Energies= -1978.537601

|    |             |             |             |
|----|-------------|-------------|-------------|
| Mo | 1.74026400  | -0.58943800 | -0.08023200 |
| S  | 3.74701600  | -0.15764800 | 1.16334000  |
| C  | 4.68945500  | 0.92111700  | 0.12014500  |
| H  | 5.72009400  | 1.09631200  | 0.42247100  |
| C  | 4.15360400  | 1.54613600  | -0.94243600 |
| H  | 4.72959500  | 2.23688400  | -1.55417000 |
| S  | 2.46747700  | 1.29744500  | -1.42869400 |
| S  | 0.46234000  | -0.82834800 | 1.80716800  |
| O  | -0.28296200 | -0.05350500 | -0.86879200 |
| H  | -0.44658400 | -0.57663300 | -1.67338400 |
| C  | -1.53273100 | -0.11513500 | -0.10511900 |
| H  | -0.87803000 | -0.66274900 | 1.02448700  |
| N  | -2.41505900 | -0.98119200 | -0.62333600 |
| O  | 1.98573600  | -2.08224000 | -0.86485900 |
| C  | -3.25187900 | 1.58165000  | 0.55360500  |
| C  | -4.19439700 | 0.57112700  | 0.13023400  |
| C  | -3.69854600 | -0.62318000 | -0.42440000 |
| N  | -1.92627700 | 1.16830900  | 0.31880200  |
| H  | -1.20496500 | 1.78004700  | 0.68571700  |
| O  | -3.48974600 | 2.68499000  | 1.04326100  |
| C  | -5.60386600 | 0.43883200  | 0.08738700  |
| H  | -6.35512400 | 1.14256400  | 0.41869200  |
| N  | -4.79490300 | -1.35970100 | -0.74905800 |
| N  | -5.97072700 | -0.72422500 | -0.44107300 |
| H  | -4.81068600 | -2.28279800 | -1.15378900 |

**T1-PC (O-Down)**

|                                              |                             |             |             |
|----------------------------------------------|-----------------------------|-------------|-------------|
| Zero-point correction=                       | 0.152113 (Hartree/Particle) |             |             |
| Thermal correction to Energy=                | 0.170886                    |             |             |
| Thermal correction to Enthalpy=              | 0.171830                    |             |             |
| Thermal correction to Gibbs Free Energy=     | 0.099621                    |             |             |
| Sum of electronic and zero-point Energies=   | -1978.546209                |             |             |
| Sum of electronic and thermal Energies=      | -1978.527436                |             |             |
| Sum of electronic and thermal Enthalpies=    | -1978.526492                |             |             |
| Sum of electronic and thermal Free Energies= | -1978.598701                |             |             |
| Mo                                           | 1.93944500                  | -0.07726800 | 0.05431500  |
| S                                            | 3.53625500                  | -0.11210300 | -1.64927400 |
| C                                            | 5.08047200                  | 0.38847800  | -0.88937700 |
| H                                            | 5.92058700                  | 0.54423500  | -1.56179400 |
| C                                            | 5.16863600                  | 0.55412200  | 0.43646700  |
| H                                            | 6.08673500                  | 0.85559900  | 0.93493600  |
| S                                            | 3.74496400                  | 0.28039500  | 1.49044500  |
| S                                            | 0.85379900                  | -2.17620400 | 0.39721700  |
| O                                            | -1.38709000                 | 2.23508500  | 0.03098200  |
| H                                            | -0.43921400                 | 1.82201600  | -0.00635600 |
| C                                            | -2.35524200                 | 1.35346300  | 0.00767300  |
| H                                            | -0.32980800                 | -1.50882300 | 0.38149100  |
| N                                            | -2.16123400                 | 0.05326900  | -0.02401700 |
| O                                            | 0.97850700                  | 1.37259700  | -0.06203200 |
| C                                            | -4.84960800                 | 1.24546500  | -0.00336600 |
| C                                            | -4.63817400                 | -0.17693200 | -0.04697400 |
| C                                            | -3.31811100                 | -0.65782200 | -0.05568800 |
| N                                            | -3.60991900                 | 1.93023200  | 0.02002400  |
| H                                            | -3.65442300                 | 2.94209100  | 0.04429700  |
| O                                            | -5.90504400                 | 1.87717100  | 0.01231700  |
| C                                            | -5.45124600                 | -1.34023300 | -0.09297200 |
| H                                            | -6.53036600                 | -1.40754200 | -0.10232400 |
| N                                            | -3.41630000                 | -2.00860500 | -0.10317700 |
| N                                            | -4.71574500                 | -2.44307900 | -0.12738400 |
| H                                            | -2.65946300                 | -2.67652700 | -0.12854600 |

**T1-RC (O-Up)**

|                                              |                             |             |             |
|----------------------------------------------|-----------------------------|-------------|-------------|
| Zero-point correction=                       | 0.154895 (Hartree/Particle) |             |             |
| Thermal correction to Energy=                | 0.173848                    |             |             |
| Thermal correction to Enthalpy=              | 0.174792                    |             |             |
| Thermal correction to Gibbs Free Energy=     | 0.102179                    |             |             |
| Sum of electronic and zero-point Energies=   | -1978.559508                |             |             |
| Sum of electronic and thermal Energies=      | -1978.540555                |             |             |
| Sum of electronic and thermal Enthalpies=    | -1978.539611                |             |             |
| Sum of electronic and thermal Free Energies= | -1978.612224                |             |             |
| Mo                                           | -2.02938700                 | -0.25658200 | 0.55066000  |
| S                                            | -4.02699400                 | -0.93189800 | -0.73875300 |
| C                                            | -4.78272500                 | 0.54154700  | -1.32702700 |
| H                                            | -5.75534100                 | 0.41425800  | -1.79780500 |
| C                                            | -4.16518600                 | 1.73487100  | -1.27874400 |
| H                                            | -4.60848400                 | 2.63303500  | -1.70207900 |
| S                                            | -2.55759600                 | 1.90149800  | -0.59381400 |
| S                                            | -1.12128900                 | -2.20815400 | 0.15445600  |
| O                                            | -0.32653400                 | 0.79251800  | 0.71962000  |
| H                                            | -0.39406000                 | 1.75789000  | 0.73848900  |
| C                                            | 2.51426200                  | -1.09616200 | -0.37910300 |
| H                                            | 1.62664400                  | -1.70875200 | -0.51279200 |
| N                                            | 3.68395400                  | -1.57486900 | -0.73486100 |
| O                                            | -2.69177600                 | -0.24403000 | 2.12216300  |
| C                                            | 3.28957100                  | 1.10215500  | 0.41028300  |
| C                                            | 4.59276200                  | 0.60212700  | 0.03128700  |
| C                                            | 4.69089800                  | -0.68796500 | -0.50749800 |
| N                                            | 2.28905600                  | 0.13240200  | 0.15886400  |
| H                                            | 1.30445800                  | 0.39326300  | 0.39467400  |
| O                                            | 3.01040700                  | 2.20024100  | 0.88603500  |
| C                                            | 5.92471700                  | 1.09136500  | 0.04851200  |
| H                                            | 6.28564300                  | 2.05171100  | 0.38968300  |
| N                                            | 6.00858000                  | -0.88661500 | -0.76749500 |
| N                                            | 6.77702600                  | 0.19254400  | -0.43293900 |
| H                                            | 6.43659000                  | -1.71003400 | -1.16189100 |

**T1-TS (O-Up)**

|                                              |                             |             |             |
|----------------------------------------------|-----------------------------|-------------|-------------|
| Zero-point correction=                       | 0.150634 (Hartree/Particle) |             |             |
| Thermal correction to Energy=                | 0.168240                    |             |             |
| Thermal correction to Enthalpy=              | 0.169184                    |             |             |
| Thermal correction to Gibbs Free Energy=     | 0.103471                    |             |             |
| Sum of electronic and zero-point Energies=   | -1978.492301                |             |             |
| Sum of electronic and thermal Energies=      | -1978.474695                |             |             |
| Sum of electronic and thermal Enthalpies=    | -1978.473750                |             |             |
| Sum of electronic and thermal Free Energies= | -1978.539464                |             |             |
| Mo                                           | 1.68285000                  | -0.43688800 | -0.12993200 |
| S                                            | 3.77795400                  | -0.47014000 | 1.05301000  |
| C                                            | 4.76780400                  | 0.76757300  | 0.26032200  |
| H                                            | 5.81280400                  | 0.80137100  | 0.56239200  |
| C                                            | 4.26205100                  | 1.65946900  | -0.60766600 |
| H                                            | 4.87229300                  | 2.43838300  | -1.05853200 |
| S                                            | 2.56269000                  | 1.61446200  | -1.10928000 |
| S                                            | 0.48627400                  | -0.99455500 | 1.74053400  |
| O                                            | -0.22380200                 | 0.55647300  | -0.57338900 |
| H                                            | -0.19709600                 | 1.52934000  | -0.53346400 |
| C                                            | -1.49955400                 | 0.17134100  | 0.05848400  |
| H                                            | -0.84925000                 | -0.38260000 | 1.16802700  |
| N                                            | -2.24343400                 | 1.22885000  | 0.41171800  |
| O                                            | 1.70308700                  | -1.73914200 | -1.22741500 |
| C                                            | -3.43185200                 | -1.22354900 | -0.69548800 |
| C                                            | -4.22677200                 | -0.13811000 | -0.16680000 |
| C                                            | -3.56839600                 | 0.99918500  | 0.33669000  |
| N                                            | -2.05610800                 | -0.93272500 | -0.61167600 |
| H                                            | -1.42963800                 | -1.68787500 | -0.87427800 |
| O                                            | -3.82336600                 | -2.28040900 | -1.18799500 |
| C                                            | -5.60740100                 | 0.14346700  | -0.02437200 |
| H                                            | -6.45079600                 | -0.47700900 | -0.29479800 |
| N                                            | -4.55429300                 | 1.84946700  | 0.73041300  |
| N                                            | -5.81017400                 | 1.34029700  | 0.51691300  |
| H                                            | -4.44328900                 | 2.75858000  | 1.15135200  |

**T1-PC (O-Up)**

|                                              |                             |             |             |
|----------------------------------------------|-----------------------------|-------------|-------------|
| Zero-point correction=                       | 0.152351 (Hartree/Particle) |             |             |
| Thermal correction to Energy=                | 0.171676                    |             |             |
| Thermal correction to Enthalpy=              | 0.172620                    |             |             |
| Thermal correction to Gibbs Free Energy=     | 0.098195                    |             |             |
| Sum of electronic and zero-point Energies=   | -1978.533418                |             |             |
| Sum of electronic and thermal Energies=      | -1978.514092                |             |             |
| Sum of electronic and thermal Enthalpies=    | -1978.513148                |             |             |
| Sum of electronic and thermal Free Energies= | -1978.587573                |             |             |
| Mo                                           | -2.29784900                 | 0.59973300  | 0.00023400  |
| S                                            | -2.53584100                 | -1.10638600 | -1.58880400 |
| C                                            | -2.51132900                 | -2.64470600 | -0.67088900 |
| H                                            | -2.50994700                 | -3.55916600 | -1.26019300 |
| C                                            | -2.51162900                 | -2.64503200 | 0.66972800  |
| H                                            | -2.51049700                 | -3.55978600 | 1.25858300  |
| S                                            | -2.53649700                 | -1.10718600 | 1.58840700  |
| S                                            | -4.13902800                 | 2.14986200  | -0.00033300 |
| O                                            | 1.03340200                  | -1.55799100 | 0.00055200  |
| H                                            | 1.23601700                  | -2.50553200 | 0.00040500  |
| C                                            | 2.18263900                  | -0.88286500 | 0.00031300  |
| H                                            | -3.33600500                 | 3.23956200  | 0.00084800  |
| N                                            | 3.32759900                  | -1.53084600 | 0.00021500  |
| O                                            | -0.66520200                 | 1.16232600  | 0.00054300  |
| C                                            | 3.09488700                  | 1.39448600  | 0.00005900  |
| C                                            | 4.37166800                  | 0.71365500  | -0.00007100 |
| C                                            | 4.39265000                  | -0.68610800 | 0.00000200  |
| N                                            | 2.02058600                  | 0.46609900  | 0.00016100  |
| H                                            | 1.04066300                  | 0.82764200  | 0.00032100  |
| O                                            | 2.88886300                  | 2.60273100  | 0.00009000  |
| C                                            | 5.73799100                  | 1.09760900  | -0.00028300 |
| H                                            | 6.15511100                  | 2.09522500  | -0.00041100 |
| N                                            | 5.70099400                  | -1.04306700 | -0.00010000 |
| N                                            | 6.54173400                  | 0.04068400  | -0.00031400 |
| H                                            | 6.08200000                  | -1.97622300 | -0.00005700 |

**T2-RC (O-Down)**

|                                              |                             |             |             |
|----------------------------------------------|-----------------------------|-------------|-------------|
| Zero-point correction=                       | 0.154564 (Hartree/Particle) |             |             |
| Thermal correction to Energy=                | 0.173720                    |             |             |
| Thermal correction to Enthalpy=              | 0.174664                    |             |             |
| Thermal correction to Gibbs Free Energy=     | 0.100751                    |             |             |
| Sum of electronic and zero-point Energies=   | -1978.550209                |             |             |
| Sum of electronic and thermal Energies=      | -1978.531053                |             |             |
| Sum of electronic and thermal Enthalpies=    | -1978.530109                |             |             |
| Sum of electronic and thermal Free Energies= | -1978.604022                |             |             |
| Mo                                           | 1.90026700                  | -0.30329000 | -0.25211100 |
| S                                            | 4.19778800                  | -1.00221400 | 0.32766400  |
| C                                            | 5.21377100                  | 0.43074500  | 0.29785100  |
| H                                            | 6.27889000                  | 0.25044600  | 0.42800400  |
| C                                            | 4.70687400                  | 1.67213600  | 0.20342400  |
| H                                            | 5.33406700                  | 2.55957800  | 0.24701100  |
| S                                            | 2.98018600                  | 1.93754400  | 0.04861300  |
| S                                            | 1.12427300                  | -2.00588600 | 0.88224900  |
| O                                            | 0.34642700                  | 0.93205200  | -0.01377300 |
| H                                            | 0.48339300                  | 1.88749700  | 0.03622500  |
| C                                            | -2.61041000                 | -1.10844200 | -0.16210200 |
| H                                            | -1.72849000                 | -1.73717200 | -0.25452500 |
| N                                            | -3.79101700                 | -1.65596900 | -0.21583800 |
| O                                            | 1.86278200                  | -0.69521100 | -1.91312700 |
| C                                            | -3.30487800                 | 1.22354600  | 0.15516900  |
| C                                            | -4.63890400                 | 0.65064500  | 0.10305200  |
| C                                            | -4.82092900                 | -0.75523400 | -0.07979400 |
| N                                            | -2.33382700                 | 0.22657900  | 0.01128700  |
| H                                            | -1.33469000                 | 0.52451700  | 0.02280500  |
| O                                            | -3.01590500                 | 2.41080100  | 0.30213600  |
| C                                            | -5.91880000                 | 1.17400600  | 0.19192900  |
| H                                            | -6.27851700                 | 2.18292200  | 0.33071800  |
| N                                            | -6.12087300                 | -1.08376000 | -0.10274700 |
| N                                            | -6.74754900                 | 0.10961000  | 0.06454800  |
| H                                            | -7.75575400                 | 0.11853400  | 0.08218400  |

**T2-TS (O-Down)**

|                                              |                             |             |             |
|----------------------------------------------|-----------------------------|-------------|-------------|
| Zero-point correction=                       | 0.150338 (Hartree/Particle) |             |             |
| Thermal correction to Energy=                | 0.168029                    |             |             |
| Thermal correction to Enthalpy=              | 0.168973                    |             |             |
| Thermal correction to Gibbs Free Energy=     | 0.103022                    |             |             |
| Sum of electronic and zero-point Energies=   | -1978.479049                |             |             |
| Sum of electronic and thermal Energies=      | -1978.461358                |             |             |
| Sum of electronic and thermal Enthalpies=    | -1978.460414                |             |             |
| Sum of electronic and thermal Free Energies= | -1978.526365                |             |             |
| Mo                                           | 1.74416000                  | -0.61040700 | -0.08082000 |
| S                                            | 3.73836000                  | -0.08597100 | 1.15663100  |
| C                                            | 4.63914700                  | 1.01644300  | 0.10222900  |
| H                                            | 5.66132300                  | 1.23631900  | 0.40449500  |
| C                                            | 4.08139800                  | 1.60656800  | -0.96912600 |
| H                                            | 4.63118900                  | 2.31307600  | -1.58715800 |
| S                                            | 2.40791500                  | 1.28609100  | -1.45478500 |
| S                                            | 0.48063600                  | -0.87352100 | 1.80717600  |
| O                                            | -0.27949600                 | -0.13491600 | -0.87375300 |
| H                                            | -0.45833200                 | -0.68098600 | -1.66014300 |
| C                                            | -1.53211500                 | -0.19524300 | -0.08890000 |
| H                                            | -0.88299600                 | -0.74334100 | 1.00640500  |
| N                                            | -2.42669100                 | -1.02142600 | -0.62462000 |
| O                                            | 2.04902700                  | -2.10348100 | -0.84248400 |
| C                                            | -3.17596900                 | 1.55816800  | 0.58246300  |
| C                                            | -4.15134800                 | 0.58100300  | 0.13128700  |
| C                                            | -3.72641600                 | -0.65932400 | -0.44948700 |
| N                                            | -1.87827500                 | 1.10845900  | 0.35766100  |
| H                                            | -1.13485000                 | 1.68000100  | 0.74493700  |
| O                                            | -3.40654700                 | 2.65703900  | 1.08932800  |
| C                                            | -5.53337900                 | 0.54809600  | 0.09906000  |
| H                                            | -6.27795000                 | 1.25972500  | 0.42483700  |
| N                                            | -4.78060000                 | -1.40882100 | -0.81728100 |
| N                                            | -5.85164600                 | -0.64000200 | -0.46860300 |
| H                                            | -6.77498200                 | -1.00416400 | -0.64327500 |

**T2-PC (O-down)**

|                                              |                             |             |             |
|----------------------------------------------|-----------------------------|-------------|-------------|
| Zero-point correction=                       | 0.151706 (Hartree/Particle) |             |             |
| Thermal correction to Energy=                | 0.170743                    |             |             |
| Thermal correction to Enthalpy=              | 0.171687                    |             |             |
| Thermal correction to Gibbs Free Energy=     | 0.098125                    |             |             |
| Sum of electronic and zero-point Energies=   | -1978.534052                |             |             |
| Sum of electronic and thermal Energies=      | -1978.515015                |             |             |
| Sum of electronic and thermal Enthalpies=    | -1978.514071                |             |             |
| Sum of electronic and thermal Free Energies= | -1978.587633                |             |             |
| Mo                                           | 2.43098800                  | -0.57974800 | 0.00015200  |
| S                                            | 3.35718100                  | 0.86301600  | -1.58509400 |
| C                                            | 3.98406500                  | 2.26978200  | -0.67005900 |
| H                                            | 4.35563700                  | 3.10321000  | -1.26134200 |
| C                                            | 3.98480100                  | 2.26963600  | 0.66931100  |
| H                                            | 4.35702000                  | 3.10293500  | 1.26036900  |
| S                                            | 3.35892900                  | 0.86265800  | 1.58473500  |
| S                                            | 3.47531800                  | -2.74275400 | -0.00083800 |
| O                                            | -1.28862100                 | 1.15244000  | 0.00100200  |
| H                                            | -0.54216000                 | 0.44489100  | 0.00094100  |
| C                                            | -2.50858600                 | 0.66827800  | 0.00063800  |
| H                                            | 2.29524200                  | -3.40588200 | 0.00018700  |
| N                                            | -2.80085300                 | -0.60072000 | 0.00066500  |
| O                                            | 0.70208800                  | -0.41271900 | 0.00097700  |
| C                                            | -4.84540600                 | 1.52407000  | -0.00023200 |
| C                                            | -5.18021900                 | 0.11677300  | -0.00024000 |
| C                                            | -4.14339400                 | -0.87274400 | 0.00024200  |
| N                                            | -3.45812500                 | 1.69282100  | 0.00021800  |
| H                                            | -3.10842300                 | 2.64365100  | 0.00030900  |
| O                                            | -5.61222400                 | 2.48835400  | -0.00056400 |
| C                                            | -6.36991200                 | -0.59465000 | -0.00047700 |
| H                                            | -7.40170300                 | -0.27493400 | -0.00075700 |
| N                                            | -4.65814300                 | -2.11056200 | 0.00025800  |
| N                                            | -6.00375900                 | -1.89616600 | -0.00014900 |
| H                                            | -6.61184700                 | -2.70025900 | -0.00031600 |

**T2-RC (O-Up)**

|                                              |                             |             |             |
|----------------------------------------------|-----------------------------|-------------|-------------|
| Zero-point correction=                       | 0.154775 (Hartree/Particle) |             |             |
| Thermal correction to Energy=                | 0.173747                    |             |             |
| Thermal correction to Enthalpy=              | 0.174691                    |             |             |
| Thermal correction to Gibbs Free Energy=     | 0.101544                    |             |             |
| Sum of electronic and zero-point Energies=   | -1978.549933                |             |             |
| Sum of electronic and thermal Energies=      | -1978.530962                |             |             |
| Sum of electronic and thermal Enthalpies=    | -1978.530018                |             |             |
| Sum of electronic and thermal Free Energies= | -1978.603164                |             |             |
| Mo                                           | 2.02208900                  | 0.28515800  | 0.50213600  |
| S                                            | 4.11302100                  | 0.89580000  | -0.66839900 |
| C                                            | 4.90035800                  | -0.60379300 | -1.13715800 |
| H                                            | 5.90356900                  | -0.49898100 | -1.54523400 |
| C                                            | 4.27654800                  | -1.79341600 | -1.07759300 |
| H                                            | 4.74480000                  | -2.71024000 | -1.42857400 |
| S                                            | 2.62646700                  | -1.92862200 | -0.49473200 |
| S                                            | 1.15646700                  | 2.21576800  | -0.05303100 |
| O                                            | 0.31056000                  | -0.75286700 | 0.59881500  |
| H                                            | 0.36089600                  | -1.71889600 | 0.62588900  |
| C                                            | -2.62354200                 | 1.18438600  | -0.32573900 |
| H                                            | -1.75910500                 | 1.83442700  | -0.43427800 |
| N                                            | -3.80772300                 | 1.64732600  | -0.60837000 |
| O                                            | 2.56627100                  | 0.35024500  | 2.11780800  |
| C                                            | -3.26667200                 | -1.09542800 | 0.31210900  |
| C                                            | -4.60426900                 | -0.61653800 | 0.00885300  |
| C                                            | -4.81371100                 | 0.72608800  | -0.43421600 |
| N                                            | -2.32160600                 | -0.08295600 | 0.11051000  |
| H                                            | -1.32282700                 | -0.32135000 | 0.29981100  |
| O                                            | -2.95471900                 | -2.22288700 | 0.69396700  |
| C                                            | -5.86569400                 | -1.18884400 | 0.04251100  |
| H                                            | -6.20261700                 | -2.17885200 | 0.31261200  |
| N                                            | -6.11243100                 | 0.97236600  | -0.66002100 |
| N                                            | -6.71106100                 | -0.20933800 | -0.35980800 |
| H                                            | -7.71300100                 | -0.27232600 | -0.45480800 |

**T2-TS (O-Up)**

|                                              |                             |             |             |
|----------------------------------------------|-----------------------------|-------------|-------------|
| Zero-point correction=                       | 0.150531 (Hartree/Particle) |             |             |
| Thermal correction to Energy=                | 0.168079                    |             |             |
| Thermal correction to Enthalpy=              | 0.169023                    |             |             |
| Thermal correction to Gibbs Free Energy=     | 0.103611                    |             |             |
| Sum of electronic and zero-point Energies=   | -1978.481593                |             |             |
| Sum of electronic and thermal Energies=      | -1978.464045                |             |             |
| Sum of electronic and thermal Enthalpies=    | -1978.463101                |             |             |
| Sum of electronic and thermal Free Energies= | -1978.528513                |             |             |
| Mo                                           | 1.67030400                  | -0.41532400 | -0.13449300 |
| S                                            | 3.79049800                  | -0.53164200 | 1.00293000  |
| C                                            | 4.78687800                  | 0.71852500  | 0.23898100  |
| H                                            | 5.83812100                  | 0.72266800  | 0.52085400  |
| C                                            | 4.27962100                  | 1.65209900  | -0.58334600 |
| H                                            | 4.89519400                  | 2.43791600  | -1.01491700 |
| S                                            | 2.56985500                  | 1.65978200  | -1.04809200 |
| S                                            | 0.50116100                  | -1.03761800 | 1.72697900  |
| O                                            | -0.21960300                 | 0.61378100  | -0.51279700 |
| H                                            | -0.20726500                 | 1.58474100  | -0.43540700 |
| C                                            | -1.50101500                 | 0.19833100  | 0.12196900  |
| H                                            | -0.85177100                 | -0.37055800 | 1.18974400  |
| N                                            | -2.25318600                 | 1.23533600  | 0.47756000  |
| O                                            | 1.65014700                  | -1.67139000 | -1.28594100 |
| C                                            | -3.37690100                 | -1.21096900 | -0.71578800 |
| C                                            | -4.19878600                 | -0.13865100 | -0.18107800 |
| C                                            | -3.59495200                 | 1.03258300  | 0.38516300  |
| N                                            | -2.02314100                 | -0.91327500 | -0.58974000 |
| H                                            | -1.37457800                 | -1.65045700 | -0.85037100 |
| O                                            | -3.76973800                 | -2.25599600 | -1.23579600 |
| C                                            | -5.56257400                 | 0.07081200  | -0.09100300 |
| H                                            | -6.40501500                 | -0.53585600 | -0.38966800 |
| N                                            | -4.52815600                 | 1.90828400  | 0.79820800  |
| N                                            | -5.70239500                 | 1.28710300  | 0.48922300  |
| H                                            | -6.56360800                 | 1.75714100  | 0.71952500  |

**T2-PC (O-Up)**

|                                              |                             |             |             |
|----------------------------------------------|-----------------------------|-------------|-------------|
| Zero-point correction=                       | 0.152933 (Hartree/Particle) |             |             |
| Thermal correction to Energy=                | 0.171753                    |             |             |
| Thermal correction to Enthalpy=              | 0.172697                    |             |             |
| Thermal correction to Gibbs Free Energy=     | 0.102036                    |             |             |
| Sum of electronic and zero-point Energies=   | -1978.521693                |             |             |
| Sum of electronic and thermal Energies=      | -1978.502873                |             |             |
| Sum of electronic and thermal Enthalpies=    | -1978.501929                |             |             |
| Sum of electronic and thermal Free Energies= | -1978.572590                |             |             |
| Mo                                           | 1.77398800                  | 0.27060500  | 0.29940000  |
| S                                            | 3.98370100                  | -0.41592400 | 0.64589100  |
| C                                            | 4.26299600                  | -1.72351800 | -0.54370000 |
| H                                            | 5.19994200                  | -2.26847200 | -0.44892000 |
| C                                            | 3.37579600                  | -1.98971300 | -1.51334800 |
| H                                            | 3.53309100                  | -2.77313700 | -2.25129700 |
| S                                            | 1.84457400                  | -1.07435300 | -1.64509800 |
| S                                            | 2.26050600                  | 2.66494700  | 0.22760400  |
| O                                            | -0.60165300                 | 1.22013300  | -0.40611700 |
| H                                            | -0.63576400                 | 1.83310400  | -1.15907200 |
| C                                            | -1.82846900                 | 0.67850300  | -0.23855600 |
| H                                            | 1.02031000                  | 3.09340300  | 0.56166900  |
| N                                            | -2.81588700                 | 1.09654900  | -0.96997900 |
| O                                            | 0.80795400                  | -0.48609800 | 1.51759600  |
| C                                            | -3.02469800                 | -0.95835600 | 1.12051500  |
| C                                            | -4.16057400                 | -0.52293100 | 0.32575000  |
| C                                            | -4.00816300                 | 0.47646700  | -0.68281300 |
| N                                            | -1.85645500                 | -0.27128200 | 0.74528800  |
| H                                            | -0.95048000                 | -0.50999000 | 1.19792200  |
| O                                            | -3.02560000                 | -1.80126500 | 2.01034400  |
| C                                            | -5.50028300                 | -0.87391800 | 0.28715800  |
| H                                            | -6.07435500                 | -1.58698600 | 0.86039200  |
| N                                            | -5.16526700                 | 0.73342200  | -1.30347800 |
| N                                            | -6.04273800                 | -0.10611200 | -0.68649800 |
| H                                            | -7.00353300                 | -0.09747500 | -0.99180800 |

**T10-RC**

|                                              |                             |             |             |
|----------------------------------------------|-----------------------------|-------------|-------------|
| Zero-point correction=                       | 0.154079 (Hartree/Particle) |             |             |
| Thermal correction to Energy=                | 0.173226                    |             |             |
| Thermal correction to Enthalpy=              | 0.174170                    |             |             |
| Thermal correction to Gibbs Free Energy=     | 0.101548                    |             |             |
| Sum of electronic and zero-point Energies=   | -1978.528438                |             |             |
| Sum of electronic and thermal Energies=      | -1978.509291                |             |             |
| Sum of electronic and thermal Enthalpies=    | -1978.508347                |             |             |
| Sum of electronic and thermal Free Energies= | -1978.580969                |             |             |
| Mo                                           | 2.05359400                  | -0.04304900 | 0.67838800  |
| S                                            | 3.60396600                  | 1.33985500  | -0.63800100 |
| C                                            | 4.53216600                  | 0.26392800  | -1.67162500 |
| H                                            | 5.34518600                  | 0.73192100  | -2.22219200 |
| C                                            | 4.20800100                  | -1.02957500 | -1.83731700 |
| H                                            | 4.74193000                  | -1.68024700 | -2.52549200 |
| S                                            | 2.84656800                  | -1.73411700 | -0.98546700 |
| S                                            | 0.73187900                  | 1.69727300  | 0.92295300  |
| O                                            | 0.62332300                  | -1.44531600 | 0.71068500  |
| H                                            | 0.81476500                  | -2.28373000 | 0.26886000  |
| C                                            | -2.13281900                 | -0.31670500 | 0.24837100  |
| H                                            | -1.09706800                 | -0.58027100 | 0.48107500  |
| N                                            | -3.07890100                 | -1.23220500 | 0.39540500  |
| O                                            | 2.94583700                  | -0.26015300 | 2.11363600  |
| C                                            | -3.77123000                 | 1.37914200  | -0.58197600 |
| C                                            | -4.75151600                 | 0.35628000  | -0.40507200 |
| C                                            | -4.40171600                 | -0.92871000 | 0.07952000  |
| N                                            | -2.44378500                 | 0.89789100  | -0.20607800 |
| H                                            | -1.67730900                 | 1.56749300  | -0.27771400 |
| O                                            | -3.86884900                 | 2.53277400  | -0.97922800 |
| C                                            | -6.14721400                 | 0.20715800  | -0.58381800 |
| H                                            | -6.86314300                 | 0.93475400  | -0.94273900 |
| N                                            | -5.43383500                 | -1.75020100 | 0.18260100  |
| N                                            | -6.53093900                 | -1.02742000 | -0.23695500 |
| H                                            | -2.83819600                 | -2.15401000 | 0.74011700  |

**T10-TS**

|                                              |                             |             |             |
|----------------------------------------------|-----------------------------|-------------|-------------|
| Zero-point correction=                       | 0.149442 (Hartree/Particle) |             |             |
| Thermal correction to Energy=                | 0.167297                    |             |             |
| Thermal correction to Enthalpy=              | 0.168241                    |             |             |
| Thermal correction to Gibbs Free Energy=     | 0.101261                    |             |             |
| Sum of electronic and zero-point Energies=   | -1978.460357                |             |             |
| Sum of electronic and thermal Energies=      | -1978.442502                |             |             |
| Sum of electronic and thermal Enthalpies=    | -1978.441558                |             |             |
| Sum of electronic and thermal Free Energies= | -1978.508538                |             |             |
| Mo                                           | 1.63928100                  | -0.39283700 | -0.06103700 |
| S                                            | 3.76522900                  | -0.73080200 | 0.96445800  |
| C                                            | 4.88750100                  | 0.24629100  | -0.00343800 |
| H                                            | 5.94565100                  | 0.09327800  | 0.19763700  |
| C                                            | 4.46705000                  | 1.16703200  | -0.88602100 |
| H                                            | 5.15827800                  | 1.78569200  | -1.45292200 |
| S                                            | 2.74143400                  | 1.43870500  | -1.20146100 |
| S                                            | 0.45839700                  | -0.63228100 | 1.92595400  |
| O                                            | -0.23087800                 | 0.78158400  | -0.46667400 |
| H                                            | -0.30404600                 | 1.06998000  | -1.39531000 |
| C                                            | -1.52251800                 | 0.43283300  | 0.04601100  |
| H                                            | -0.81053600                 | -0.13760700 | 1.35257100  |
| N                                            | -2.11806800                 | -0.62019600 | -0.56108900 |
| O                                            | 1.37301700                  | -1.72882300 | -1.08746900 |
| C                                            | -3.75846200                 | 1.50338300  | 0.50802000  |
| C                                            | -4.32133900                 | 0.29566800  | -0.00323500 |
| C                                            | -3.50057000                 | -0.74741900 | -0.50771700 |
| N                                            | -2.31307200                 | 1.49478200  | 0.40081400  |
| H                                            | -1.84787100                 | 2.28234900  | 0.83852500  |
| O                                            | -4.28677600                 | 2.50299200  | 0.98509100  |
| C                                            | -5.60867900                 | -0.26092600 | -0.16935100 |
| H                                            | -6.56875500                 | 0.17022400  | 0.08211400  |
| N                                            | -4.19553200                 | -1.79621700 | -0.92643500 |
| N                                            | -5.51966300                 | -1.48249800 | -0.71380900 |
| H                                            | -1.53992900                 | -1.41302500 | -0.83186400 |



**T10-PC**

Zero-point correction= 0.150121 (Hartree/Particle)  
Thermal correction to Energy= 0.169073  
Thermal correction to Enthalpy= 0.170017  
Thermal correction to Gibbs Free Energy= 0.097112  
Sum of electronic and zero-point Energies= -1978.524061  
Sum of electronic and thermal Energies= -1978.505109  
Sum of electronic and thermal Enthalpies= -1978.504165  
Sum of electronic and thermal Free Energies= -1978.577071

|    |             |             |             |
|----|-------------|-------------|-------------|
| Mo | 2.15989900  | -0.53421800 | 0.04919900  |
| S  | 3.18404000  | 0.64439800  | -1.66264100 |
| C  | 4.06761100  | 1.99102800  | -0.87917200 |
| H  | 4.52713700  | 2.71665500  | -1.54493700 |
| C  | 4.14226300  | 2.07050700  | 0.45486100  |
| H  | 4.66792200  | 2.86660900  | 0.97527000  |
| S  | 3.35937100  | 0.83161700  | 1.48509300  |
| S  | 2.96588900  | -2.77418700 | 0.13694500  |
| O  | -1.21687800 | 1.68636100  | 0.15597700  |
| H  | -0.41220800 | 0.97876400  | 0.14195000  |
| C  | -2.36490000 | 1.08259700  | 0.09355500  |
| H  | 1.72837800  | -3.31777000 | 0.22262100  |
| N  | -2.48273500 | -0.24533300 | 0.01828500  |
| O  | 0.44314600  | -0.11027100 | 0.11786400  |
| C  | -4.86377500 | 1.38056900  | 0.04453400  |
| C  | -4.92934200 | -0.03706100 | -0.03418800 |
| C  | -3.75543200 | -0.82920700 | -0.04577600 |
| N  | -3.48353300 | 1.83994200  | 0.10647800  |
| H  | -3.35505500 | 2.84297900  | 0.16340000  |
| O  | -5.73947100 | 2.24207300  | 0.06835200  |
| C  | -5.93496200 | -1.03608700 | -0.11316800 |
| H  | -7.00980200 | -0.90922100 | -0.13422400 |
| N  | -4.00029400 | -2.12387100 | -0.12056700 |
| N  | -5.38193100 | -2.24797200 | -0.16293200 |
| H  | -1.63463100 | -0.80884500 | 0.00893300  |

## S4. Cartesian coordinates of concerted mechanisms of deprotonated allopurinol.

### I-RC

|                                              |                             |             |             |
|----------------------------------------------|-----------------------------|-------------|-------------|
| Zero-point correction=                       | 0.141480 (Hartree/Particle) |             |             |
| Thermal correction to Energy=                | 0.159800                    |             |             |
| Thermal correction to Enthalpy=              | 0.160744                    |             |             |
| Thermal correction to Gibbs Free Energy=     | 0.090343                    |             |             |
| Sum of electronic and zero-point Energies=   | -1977.951572                |             |             |
| Sum of electronic and thermal Energies=      | -1977.933252                |             |             |
| Sum of electronic and thermal Enthalpies=    | -1977.932308                |             |             |
| Sum of electronic and thermal Free Energies= | -1978.002709                |             |             |
| Mo                                           | -2.10571800                 | -0.68012000 | 0.32380600  |
| S                                            | -3.56788300                 | 0.83180400  | -1.04723100 |
| C                                            | -3.13982200                 | 2.49187400  | -0.65592000 |
| H                                            | -3.77154000                 | 3.25966700  | -1.10217300 |
| C                                            | -2.05245600                 | 2.81231100  | 0.07129100  |
| H                                            | -1.76244500                 | 3.84840900  | 0.24061900  |
| S                                            | -1.00625500                 | 1.57871500  | 0.75369300  |
| S                                            | -2.61818600                 | -2.20883800 | -1.19096600 |
| O                                            | -0.36986600                 | -1.20588500 | 0.86901400  |
| H                                            | 0.56708300                  | -1.00016400 | 0.54967900  |
| C                                            | 3.07459100                  | -1.89189300 | 0.10055200  |
| H                                            | 2.57359700                  | -2.85540400 | 0.21205500  |
| N                                            | 2.24595700                  | -0.82904500 | 0.16236700  |
| O                                            | -3.09354300                 | -0.96415700 | 1.69516500  |
| C                                            | 5.11881800                  | -0.75851500 | -0.22223000 |
| C                                            | 4.31348700                  | 0.45235900  | -0.17278400 |
| C                                            | 2.92709000                  | 0.33282100  | 0.01724800  |
| N                                            | 4.39229000                  | -1.94238900 | -0.07290900 |
| O                                            | 6.35857000                  | -0.76200000 | -0.38266700 |
| C                                            | 4.53157800                  | 1.85216100  | -0.26377900 |
| H                                            | 5.46633100                  | 2.37770500  | -0.41197500 |
| N                                            | 2.42101300                  | 1.59582700  | 0.02725700  |
| N                                            | 3.39741200                  | 2.54108800  | -0.14344100 |
| H                                            | 1.44661000                  | 1.85921600  | 0.15272000  |

### I-TS

|                                              |                             |             |             |
|----------------------------------------------|-----------------------------|-------------|-------------|
| Zero-point correction=                       | 0.135552 (Hartree/Particle) |             |             |
| Thermal correction to Energy=                | 0.153316                    |             |             |
| Thermal correction to Enthalpy=              | 0.154261                    |             |             |
| Thermal correction to Gibbs Free Energy=     | 0.088320                    |             |             |
| Sum of electronic and zero-point Energies=   | -1977.864812                |             |             |
| Sum of electronic and thermal Energies=      | -1977.847048                |             |             |
| Sum of electronic and thermal Enthalpies=    | -1977.846104                |             |             |
| Sum of electronic and thermal Free Energies= | -1977.912044                |             |             |
| Mo                                           | 1.74138700                  | -0.55099800 | -0.17238900 |
| S                                            | 3.75434800                  | -0.11370000 | 1.16692800  |
| C                                            | 4.57758100                  | 1.22637500  | 0.35447900  |
| H                                            | 5.56267100                  | 1.48634300  | 0.74302100  |
| C                                            | 4.01709200                  | 1.93677300  | -0.64331800 |
| H                                            | 4.53352500                  | 2.78215100  | -1.09732800 |
| S                                            | 2.41048500                  | 1.56268600  | -1.28449600 |
| S                                            | 0.58191400                  | -1.22817000 | 1.68241700  |
| O                                            | -0.15246000                 | 0.06325300  | -0.77022900 |
| H                                            | -0.26757200                 | 1.02648000  | -0.81267300 |
| C                                            | -1.67086100                 | -0.30003800 | 0.09100300  |
| H                                            | -0.79454800                 | -0.82537900 | 1.00868300  |
| N                                            | -2.10165600                 | 0.91675100  | 0.51622500  |
| O                                            | 2.13424800                  | -1.88192400 | -1.16013200 |
| C                                            | -3.71430200                 | -1.22590700 | -0.61682600 |
| C                                            | -4.30252000                 | 0.01512100  | -0.11758800 |
| C                                            | -3.43716800                 | 0.99278000  | 0.40622600  |
| N                                            | -2.33128100                 | -1.28576200 | -0.48773000 |
| O                                            | -4.38637900                 | -2.14686100 | -1.12451600 |
| C                                            | -5.59351600                 | 0.58897900  | -0.02137800 |
| H                                            | -6.54027400                 | 0.15769200  | -0.32207600 |
| N                                            | -4.23518400                 | 2.04237200  | 0.77320900  |
| N                                            | -5.56887100                 | 1.81091400  | 0.51517100  |
| H                                            | -3.94218500                 | 2.91139600  | 1.18842800  |

### I-PC

|                                              |                             |             |             |
|----------------------------------------------|-----------------------------|-------------|-------------|
| Zero-point correction=                       | 0.139999 (Hartree/Particle) |             |             |
| Thermal correction to Energy=                | 0.158668                    |             |             |
| Thermal correction to Enthalpy=              | 0.159612                    |             |             |
| Thermal correction to Gibbs Free Energy=     | 0.089230                    |             |             |
| Sum of electronic and zero-point Energies=   | -1977.919084                |             |             |
| Sum of electronic and thermal Energies=      | -1977.900415                |             |             |
| Sum of electronic and thermal Enthalpies=    | -1977.899471                |             |             |
| Sum of electronic and thermal Free Energies= | -1977.969853                |             |             |
| Mo                                           | -1.81065300                 | -0.36837600 | 0.37465300  |
| S                                            | -3.98030100                 | -0.58749000 | -0.64298900 |
| C                                            | -4.65491600                 | 1.05941300  | -0.63727600 |
| H                                            | -5.69289900                 | 1.15437200  | -0.95886700 |
| C                                            | -3.93397300                 | 2.14776900  | -0.30711000 |
| H                                            | -4.36161300                 | 3.14944000  | -0.33404800 |
| S                                            | -2.23825800                 | 2.02517500  | 0.22162500  |
| S                                            | -1.03774100                 | -2.11539700 | -1.15384500 |
| O                                            | 0.41157400                  | 0.47621400  | 0.32305300  |
| H                                            | 0.31181400                  | 1.43516800  | 0.19704800  |
| C                                            | 1.77270900                  | 0.22414300  | 0.18990000  |
| H                                            | 0.27499000                  | -2.13213600 | -0.81967500 |
| N                                            | 2.46386200                  | 1.35052900  | -0.06635900 |
| O                                            | -2.03086200                 | -0.88873100 | 1.97900800  |
| C                                            | 3.51513500                  | -1.33027100 | 0.25463200  |
| C                                            | 4.37811500                  | -0.18590600 | -0.02541300 |
| C                                            | 3.77782300                  | 1.07314400  | -0.16467300 |
| N                                            | 2.15605000                  | -1.02092700 | 0.34926200  |
| O                                            | 3.94207100                  | -2.48916800 | 0.40313500  |
| C                                            | 5.76245500                  | 0.05578700  | -0.21364900 |
| H                                            | 6.57536800                  | -0.65875700 | -0.18602600 |
| N                                            | 4.79043500                  | 1.95367000  | -0.41429500 |
| N                                            | 6.02425400                  | 1.34133100  | -0.45038300 |
| H                                            | 4.71201000                  | 2.94386200  | -0.57813200 |

### III-RC

|                                              |                             |             |             |
|----------------------------------------------|-----------------------------|-------------|-------------|
| Zero-point correction=                       | 0.140506 (Hartree/Particle) |             |             |
| Thermal correction to Energy=                | 0.158355                    |             |             |
| Thermal correction to Enthalpy=              | 0.159299                    |             |             |
| Thermal correction to Gibbs Free Energy=     | 0.088928                    |             |             |
| Sum of electronic and zero-point Energies=   | -1977.926705                |             |             |
| Sum of electronic and thermal Energies=      | -1977.908855                |             |             |
| Sum of electronic and thermal Enthalpies=    | -1977.907911                |             |             |
| Sum of electronic and thermal Free Energies= | -1977.978282                |             |             |
| Mo                                           | -2.12703800                 | -0.42792100 | 0.55514900  |
| S                                            | -4.03891600                 | 0.22575000  | -0.95725000 |
| C                                            | -3.79114800                 | 1.90439200  | -1.41422100 |
| H                                            | -4.59497600                 | 2.36660200  | -1.98751100 |
| C                                            | -2.64217000                 | 2.55935500  | -1.15472800 |
| H                                            | -2.47652900                 | 3.57804500  | -1.50535100 |
| S                                            | -1.31243700                 | 1.80679900  | -0.29150700 |
| S                                            | -2.58406700                 | -2.49883800 | -0.09308800 |
| O                                            | -0.28487200                 | -0.52521300 | 0.97143200  |
| H                                            | 0.60400300                  | -0.35755000 | 0.53485000  |
| C                                            | 2.57843700                  | -0.84767700 | -1.28133500 |
| H                                            | 1.71959600                  | -1.25014500 | -1.82041200 |
| N                                            | 2.27755700                  | -0.30433100 | -0.09628300 |
| O                                            | -2.87912900                 | -0.17332100 | 2.07586800  |
| C                                            | 4.90348600                  | -0.50424400 | -1.32122700 |
| C                                            | 4.69264500                  | 0.11887300  | -0.01275500 |
| C                                            | 3.37685700                  | 0.18869700  | 0.54764200  |
| N                                            | 3.75513700                  | -0.98184500 | -1.91528600 |
| O                                            | 6.03657600                  | -0.59239000 | -1.84639900 |
| C                                            | 5.51446400                  | 0.71735100  | 0.92871900  |
| H                                            | 6.58028300                  | 0.89630600  | 0.94402500  |
| N                                            | 3.37954100                  | 0.78728500  | 1.75498200  |
| N                                            | 4.69405000                  | 1.09088300  | 1.94654100  |
| H                                            | 4.94991000                  | 1.56304400  | 2.79827000  |

### III-TS

Zero-point correction= 0.135220 (Hartree/Particle)  
Thermal correction to Energy= 0.152982  
Thermal correction to Enthalpy= 0.153926  
Thermal correction to Gibbs Free Energy= 0.088070  
Sum of electronic and zero-point Energies= -1977.848527  
Sum of electronic and thermal Energies= -1977.830765  
Sum of electronic and thermal Enthalpies= -1977.829821  
Sum of electronic and thermal Free Energies= -1977.895676

|    |             |             |             |
|----|-------------|-------------|-------------|
| Mo | 1.73296800  | -0.52306600 | -0.18154900 |
| S  | 3.77984500  | -0.19848900 | 1.14283600  |
| C  | 4.63676700  | 1.13888800  | 0.36123700  |
| H  | 5.63599300  | 1.35277900  | 0.74204600  |
| C  | 4.08569000  | 1.90083900  | -0.60356900 |
| H  | 4.62457900  | 2.74344500  | -1.03659300 |
| S  | 2.45668100  | 1.60687400  | -1.22914500 |
| S  | 0.58290800  | -1.23120600 | 1.66734700  |
| O  | -0.14429300 | 0.16863400  | -0.72765100 |
| H  | -0.25445300 | 1.13278100  | -0.68274100 |
| C  | -1.68121800 | -0.23814800 | 0.12321400  |
| H  | -0.78946100 | -0.76999100 | 1.02796100  |
| N  | -2.13595800 | 0.94622300  | 0.55491400  |
| O  | 2.07220500  | -1.82857500 | -1.22224400 |
| C  | -3.65658900 | -1.22843500 | -0.63648400 |
| C  | -4.29301800 | -0.00685400 | -0.12350800 |
| C  | -3.48769900 | 1.03479100  | 0.44675500  |
| N  | -2.29222300 | -1.25235700 | -0.48756800 |
| O  | -4.31873800 | -2.14843100 | -1.16637300 |
| C  | -5.58982600 | 0.46669900  | -0.06647700 |
| H  | -6.52782900 | 0.03098100  | -0.38198900 |
| N  | -4.24165600 | 2.08768500  | 0.83840400  |
| N  | -5.51184100 | 1.70096200  | 0.50373600  |
| H  | -6.27072500 | 2.32662800  | 0.71652100  |

### III-PC

Zero-point correction= 0.139760 (Hartree/Particle)  
Thermal correction to Energy= 0.158406  
Thermal correction to Enthalpy= 0.159350  
Thermal correction to Gibbs Free Energy= 0.089262  
Sum of electronic and zero-point Energies= -1977.904811  
Sum of electronic and thermal Energies= -1977.886165  
Sum of electronic and thermal Enthalpies= -1977.885221  
Sum of electronic and thermal Free Energies= -1977.955309

|    |             |             |             |
|----|-------------|-------------|-------------|
| Mo | -1.79192300 | -0.33247600 | 0.37172000  |
| S  | -4.00391800 | -0.65221800 | -0.52700200 |
| C  | -4.71473000 | 0.97847500  | -0.57409900 |
| H  | -5.76971800 | 1.03585000  | -0.84579300 |
| C  | -4.00158400 | 2.09682500  | -0.34073000 |
| H  | -4.45261800 | 3.08702400  | -0.39934200 |
| S  | -2.27709200 | 2.03829600  | 0.09798800  |
| S  | -1.05608600 | -2.14460800 | -1.10050300 |
| O  | 0.41542200  | 0.52775300  | 0.21381300  |
| H  | 0.33286500  | 1.48919600  | 0.09523200  |
| C  | 1.78096800  | 0.26953500  | 0.12375300  |
| H  | 0.26771600  | -2.12502100 | -0.81307900 |
| N  | 2.48488200  | 1.37937100  | -0.09021700 |
| O  | -1.93190900 | -0.76670100 | 2.01078300  |
| C  | 3.46425100  | -1.33002200 | 0.22003000  |
| C  | 4.36146100  | -0.19258100 | -0.01800600 |
| C  | 3.82009300  | 1.12399400  | -0.16284100 |
| N  | 2.12588500  | -1.00076100 | 0.27782000  |
| O  | 3.89025300  | -2.49343700 | 0.35872600  |
| C  | 5.72907200  | -0.03600300 | -0.15186000 |
| H  | 6.54047100  | -0.74956800 | -0.11689100 |
| N  | 4.78590700  | 2.04227200  | -0.37255000 |
| N  | 5.93175900  | 1.29295400  | -0.35804300 |
| H  | 6.80925100  | 1.76386500  | -0.50322800 |

## S5. Cartesian coordinates of allopurinol oxidation using the cytochrome P450.

### <sup>2</sup>T1-RC

|                                              |                             |             |             |
|----------------------------------------------|-----------------------------|-------------|-------------|
| Zero-point correction=                       | 0.388603 (Hartree/Particle) |             |             |
| Thermal correction to Energy=                | 0.418706                    |             |             |
| Thermal correction to Enthalpy=              | 0.419650                    |             |             |
| Thermal correction to Gibbs Free Energy=     | 0.323189                    |             |             |
| Sum of electronic and zero-point Energies=   | -2073.077947                |             |             |
| Sum of electronic and thermal Energies=      | -2073.047844                |             |             |
| Sum of electronic and thermal Enthalpies=    | -2073.046900                |             |             |
| Sum of electronic and thermal Free Energies= | -2073.143362                |             |             |
| C                                            | -0.33073600                 | 1.23419500  | 2.38993600  |
| C                                            | -0.78606400                 | 2.50367100  | 2.89665900  |
| C                                            | -0.17385600                 | 3.46402500  | 2.15119800  |
| C                                            | 3.62749400                  | -0.01692000 | -2.37946100 |
| C                                            | -0.31640600                 | -1.23461500 | 2.40983600  |
| C                                            | 1.50608600                  | -3.42445200 | 0.31559100  |
| C                                            | 2.25931900                  | 2.77691400  | -0.68682600 |
| C                                            | -0.74067400                 | -2.50011300 | 2.95370300  |
| C                                            | 3.67947400                  | 2.48670500  | -2.40834100 |
| C                                            | 1.44947600                  | 3.41175400  | 0.24173100  |
| C                                            | 3.24406400                  | 1.21761000  | -1.87977400 |
| C                                            | 3.23891900                  | -1.25020500 | -1.87010800 |
| C                                            | 3.68795500                  | -2.52183400 | -2.38156200 |
| C                                            | -0.73650600                 | 0.00201900  | 2.88389700  |
| C                                            | 3.10110100                  | -3.48173600 | -1.61624900 |
| C                                            | 0.69681900                  | -2.78378300 | 1.24862100  |
| C                                            | 2.28796400                  | -2.79566600 | -0.64285500 |
| C                                            | -0.10756900                 | -3.46540700 | 2.23258400  |
| C                                            | 0.65251000                  | 2.77688000  | 1.18999300  |
| C                                            | 3.07179000                  | 3.45254100  | -1.66809500 |
| Fe                                           | 1.35109400                  | -0.01180300 | 0.18411700  |
| H                                            | 1.43381600                  | 4.49742000  | 0.22802900  |
| H                                            | -1.48851500                 | 2.62333100  | 3.71087800  |
| H                                            | -1.43439500                 | -2.61384300 | 3.77624800  |
| H                                            | 3.19763100                  | -4.55732800 | -1.68956200 |
| H                                            | 4.36304700                  | 2.60354800  | -3.23941300 |
| H                                            | 1.52124000                  | -4.51001600 | 0.33496500  |
| H                                            | 3.37220900                  | 1.32938900  | 2.01104100  |
| H                                            | -1.45654200                 | 0.00483800  | 3.69463200  |
| H                                            | -0.16771900                 | -4.54057400 | 2.34174600  |
| H                                            | 3.15090600                  | 4.52769900  | -1.76539300 |
| H                                            | 4.36913500                  | -2.64417200 | -3.21378000 |
| H                                            | -0.26317500                 | 4.53993000  | 2.22894800  |
| H                                            | 4.30206200                  | -0.02118600 | -3.23018600 |
| N                                            | 0.54863600                  | 1.41989200  | 1.35356200  |
| N                                            | 2.38962900                  | 1.41225600  | -0.81781200 |
| N                                            | 2.39041100                  | -1.43606600 | -0.80870800 |
| N                                            | 0.55627800                  | -1.42758100 | 1.37247200  |
| O                                            | 0.10464000                  | -0.01140400 | -0.87401000 |
| S                                            | 3.47641400                  | 0.05571100  | 1.56954400  |
| C                                            | -3.00641600                 | -0.04317000 | -2.24173900 |
| H                                            | -2.12772400                 | -0.06042200 | -2.88112500 |
| C                                            | -5.18233600                 | -0.02942900 | -1.84273100 |
| C                                            | -5.04127400                 | 0.00461300  | -0.44792100 |
| C                                            | -3.71586200                 | 0.01636100  | 0.12317100  |
| H                                            | -1.74754900                 | -0.00617300 | -0.63326300 |
| O                                            | -3.39342300                 | 0.04502900  | 1.30585800  |
| N                                            | -4.19550600                 | -0.05431200 | -2.78304100 |
| N                                            | -2.73931800                 | -0.01072800 | -0.90665500 |
| C                                            | -6.36921300                 | 0.01907900  | 0.04955200  |
| H                                            | -6.70379700                 | 0.04483400  | 1.07769900  |
| N                                            | -6.51620700                 | -0.03285900 | -2.08120100 |
| N                                            | -7.25668500                 | -0.00356600 | -0.93614400 |
| H                                            | -6.97846700                 | -0.05423100 | -2.97817400 |

### <sup>2</sup>T1-TS1

|                                              |                             |             |             |
|----------------------------------------------|-----------------------------|-------------|-------------|
| Zero-point correction=                       | 0.387163 (Hartree/Particle) |             |             |
| Thermal correction to Energy=                | 0.416353                    |             |             |
| Thermal correction to Enthalpy=              | 0.417297                    |             |             |
| Thermal correction to Gibbs Free Energy=     | 0.327032                    |             |             |
| Sum of electronic and zero-point Energies=   | -2073.039427                |             |             |
| Sum of electronic and thermal Energies=      | -2073.010237                |             |             |
| Sum of electronic and thermal Enthalpies=    | -2073.009292                |             |             |
| Sum of electronic and thermal Free Energies= | -2073.099558                |             |             |
| C                                            | -0.33200000                 | -2.23203200 | -1.96084700 |
| C                                            | -0.29633300                 | -3.66585000 | -2.13751200 |
| C                                            | 0.71854300                  | -4.13189600 | -1.36239000 |
| C                                            | 3.11985500                  | 1.45817700  | 1.81788300  |
| C                                            | -1.25216700                 | 0.00583000  | -2.48001500 |
| C                                            | -0.17992700                 | 3.15586600  | -1.28694800 |
| C                                            | 2.85518700                  | -1.94997300 | 0.91705600  |
| C                                            | -2.14359400                 | 0.86564000  | -3.22313400 |
| C                                            | 4.11875000                  | -0.77867300 | 2.36379900  |
| C                                            | 2.32712700                  | -3.03886600 | 0.22576300  |
| C                                            | 3.20773000                  | 0.08077500  | 1.64578800  |
| C                                            | 2.26672400                  | 2.31379100  | 1.12890700  |
| C                                            | 2.26785500                  | 3.74918800  | 1.27003200  |
| C                                            | -1.23170200                 | -1.38052900 | -2.58721400 |
| C                                            | 1.35433700                  | 4.23004500  | 0.38171100  |
| C                                            | -0.75435900                 | 2.06629200  | -1.92320700 |
| C                                            | 0.79011200                  | 3.08641300  | -0.29044800 |
| C                                            | -1.82439600                 | 2.14635300  | -2.88721100 |
| C                                            | 1.29713900                  | -2.98504500 | -0.70126200 |
| C                                            | 3.90084700                  | -2.04277900 | 1.90815300  |
| Fe                                           | 0.94266000                  | 0.05007500  | -0.38818700 |
| H                                            | 2.74343200                  | -4.01649200 | 0.45004300  |
| H                                            | -0.96876000                 | -4.22416800 | -2.77606600 |
| H                                            | -2.89129800                 | 0.51739300  | -3.92454900 |
| H                                            | 1.07928900                  | 5.25848900  | 0.18615100  |
| H                                            | 4.82548700                  | -0.44274100 | 3.11178300  |
| H                                            | -0.53299100                 | 4.14312800  | -1.56911000 |
| H                                            | 3.27350300                  | -0.82689400 | -1.99644300 |
| H                                            | -1.96641500                 | -1.83493800 | -3.24518200 |
| H                                            | -2.26059900                 | 3.06873900  | -3.24919300 |
| H                                            | 4.38933400                  | -2.96176600 | 2.20574900  |
| H                                            | 2.90156900                  | 4.30140700  | 1.95215300  |
| H                                            | 1.05178000                  | -5.15308300 | -1.22904200 |
| H                                            | 3.79329500                  | 1.91045900  | 2.54009400  |
| N                                            | 0.65454500                  | -1.83496400 | -1.09391100 |
| N                                            | 2.45294800                  | -0.65032300 | 0.76703100  |
| N                                            | 1.34511000                  | 1.92716100  | 0.18610000  |
| N                                            | -0.41647500                 | 0.75567400  | -1.69256000 |
| O                                            | -0.19658300                 | -0.31254200 | 0.84902400  |
| S                                            | 2.42090900                  | 0.16614900  | -2.33444900 |
| C                                            | -1.28800000                 | 0.79871800  | 1.79233500  |
| H                                            | -0.49953000                 | 1.50185700  | 2.03682800  |
| C                                            | -3.30450200                 | 0.47464300  | 0.86434300  |
| C                                            | -3.70926500                 | -0.50863000 | 1.78891500  |
| C                                            | -2.82778200                 | -0.82761600 | 2.89633500  |
| H                                            | -0.96634200                 | -0.26760200 | 3.53395000  |
| O                                            | -3.00154900                 | -1.64458100 | 3.78911000  |
| N                                            | -2.17493100                 | 1.19730900  | 0.85415900  |
| N                                            | -1.67714500                 | -0.01329200 | 2.85810700  |
| C                                            | -4.97087100                 | -0.94016500 | 1.33424800  |
| H                                            | -5.62460100                 | -1.68731800 | 1.76291200  |
| N                                            | -4.32063000                 | 0.56521800  | -0.04020900 |
| N                                            | -5.33771200                 | -0.29300100 | 0.22583100  |
| H                                            | -4.34159900                 | 1.13563400  | -0.87341800 |

## <sup>2</sup>T1-Int

|                                              |              |                         |
|----------------------------------------------|--------------|-------------------------|
| Zero-point correction=                       | 0.389697     | (Hartree/Particle)      |
| Thermal correction to Energy=                | 0.418530     |                         |
| Thermal correction to Enthalpy=              | 0.419474     |                         |
| Thermal correction to Gibbs Free Energy=     | 0.329430     |                         |
| Sum of electronic and zero-point Energies=   | -2073.041265 |                         |
| Sum of electronic and thermal Energies=      | -2073.012432 |                         |
| Sum of electronic and thermal Enthalpies=    | -2073.011488 |                         |
| Sum of electronic and thermal Free Energies= | -2073.101532 |                         |
| C                                            | 0.54814800   | 2.92692000 -1.11549000  |
| C                                            | 0.32483000   | 3.69186600 -2.32279400  |
| C                                            | 0.45674000   | 2.82823800 -3.36579600  |
| C                                            | 1.57747400   | -3.25289100 -0.34310000 |
| C                                            | 0.72904300   | 2.76592700 1.35412800   |
| C                                            | 1.43998500   | -0.08438000 3.32542500  |
| C                                            | 1.15715100   | -0.89630200 -2.95683500 |
| C                                            | 0.74529700   | 3.37928700 2.66155600   |
| C                                            | 1.46691400   | -3.12489400 -2.84298000 |
| C                                            | 0.93126500   | 0.35395900 -3.51079900  |
| C                                            | 1.43744500   | -2.53788900 -1.52486900 |
| C                                            | 1.57254200   | -2.70368900 0.93193200  |
| C                                            | 1.79205300   | -3.45123600 2.14479200  |
| C                                            | 0.50461300   | 3.45603000 0.16813100   |
| C                                            | 1.77131300   | -2.55678400 3.16990100  |
| C                                            | 1.18071100   | 1.17805200 2.79487600   |
| C                                            | 1.52844900   | -1.25867400 2.59296400  |
| C                                            | 1.03323900   | 2.39477500 3.55706900   |
| C                                            | 0.75331100   | 1.53431100 -2.79237700  |
| C                                            | 1.29803200   | -2.10798500 -3.72879000 |
| Fe                                           | 1.11655900   | 0.08219200 -0.09262700  |
| H                                            | 0.86690700   | 0.41187800 -4.59318500  |
| H                                            | 0.09758900   | 4.75004400 -2.34779500  |
| H                                            | 0.56169100   | 4.42918600 2.85086600   |
| H                                            | 1.90556600   | -2.74152800 4.22805600  |
| H                                            | 1.59699900   | -4.18075000 -3.04238700 |
| H                                            | 1.56936100   | -0.15978200 4.40080200  |
| H                                            | 3.42425300   | 0.81290500 -1.47820400  |
| H                                            | 0.29188300   | 4.51760400 0.25352000   |
| H                                            | 1.13170100   | 2.46732200 4.63261600   |
| H                                            | 1.25863500   | -2.15397400 -4.80960400 |
| H                                            | 1.95020000   | -4.52125000 2.18587000  |
| H                                            | 0.35711700   | 3.02748700 -4.42518300  |
| H                                            | 1.72082500   | -4.32596500 -0.42286000 |
| N                                            | 0.81502500   | 1.62003400 -1.43514100  |
| N                                            | 1.25451800   | -1.17973700 -1.60974500 |
| N                                            | 1.39500100   | -1.36807900 1.21974500  |
| N                                            | 0.99322000   | 1.42396700 1.46515000   |
| O                                            | -0.71693100  | 0.03258400 -0.13163400  |
| S                                            | 3.23888500   | 0.76885500 -0.13902300  |
| C                                            | -1.55350400  | -0.15886700 0.97096400  |
| H                                            | -1.01311300  | -0.06329900 1.91527000  |
| C                                            | -3.71580400  | 0.49538900 0.43915700   |
| C                                            | -4.13827100  | -0.81012700 0.05020200  |
| C                                            | -3.22822700  | -1.93993700 0.25791400  |
| H                                            | -1.36058600  | -2.25545100 0.96355600  |
| O                                            | -3.46250900  | -3.10626300 -0.03685500 |
| N                                            | -2.57041000  | 0.88674500 0.93978000   |
| N                                            | -2.07503100  | -1.53719400 0.90827700  |
| C                                            | -5.43822800  | -0.65717600 -0.42162000 |
| H                                            | -6.11344700  | -1.40813900 -0.80756600 |
| N                                            | -4.80473500  | 1.30387000 0.17696100   |
| N                                            | -5.84296700  | 0.62984600 -0.34841300  |
| H                                            | -4.86222900  | 2.30475900 0.29913500   |

## <sup>2</sup>T1-TS2

|                                              |              |                         |
|----------------------------------------------|--------------|-------------------------|
| Zero-point correction=                       | 0.384372     | (Hartree/Particle)      |
| Thermal correction to Energy=                | 0.412926     |                         |
| Thermal correction to Enthalpy=              | 0.413870     |                         |
| Thermal correction to Gibbs Free Energy=     | 0.325908     |                         |
| Sum of electronic and zero-point Energies=   | -2073.054892 |                         |
| Sum of electronic and thermal Energies=      | -2073.026339 |                         |
| Sum of electronic and thermal Enthalpies=    | -2073.025394 |                         |
| Sum of electronic and thermal Free Energies= | -2073.113356 |                         |
| C                                            | -3.14961300  | -0.54555100 -1.91851300 |
| C                                            | -3.97033100  | 0.12668200 -2.89936200  |
| C                                            | -3.75118500  | 1.46036200 -2.73873200  |
| C                                            | 0.74694000   | 1.93201300 2.46229700   |
| C                                            | -2.28398500  | -2.59353300 -0.83591500 |
| C                                            | 0.07380100   | -2.82047400 1.79985500  |
| C                                            | -1.39383000  | 2.98937300 -0.16306300  |
| C                                            | -2.20991100  | -4.03046900 -0.69582900 |
| C                                            | -0.10300500  | 4.02772600 1.36235700   |
| C                                            | -2.31158900  | 2.81347200 -1.18924600  |
| C                                            | -0.01836200  | 2.59269400 1.49372800   |
| C                                            | 0.85720400   | 0.56183500 2.60494600   |
| C                                            | 1.59552500   | -0.12478000 3.62753300  |
| C                                            | -3.07920600  | -1.92797300 -1.75882200 |
| C                                            | 1.41042500   | -1.46259000 3.43223800  |
| C                                            | -0.85005500  | -2.98845300 0.76538000  |
| C                                            | 0.55072700   | -1.61674100 2.29048000  |
| C                                            | -1.31680800  | -4.27665000 0.29992400  |
| C                                            | -2.79894000  | 1.59462500 -1.65947200  |
| C                                            | -0.95552700  | 4.27379900 0.32880700   |
| Fe                                           | -1.14332400  | -0.00105900 0.31144900  |
| H                                            | -2.69412400  | 3.71168100 -1.66528600  |
| H                                            | -4.61730500  | -0.37094900 -3.61040800 |
| H                                            | -2.77169200  | -4.73926600 -1.29068100 |
| H                                            | 1.80285800   | -2.28278300 4.02001000  |
| H                                            | 0.42735500   | 4.73788100 1.98352000   |
| H                                            | 0.42636000   | -3.72274700 2.29127100  |
| H                                            | -3.77519700  | -0.47342400 1.21208400  |
| H                                            | -3.69090900  | -2.53585100 -2.41902100 |
| H                                            | -0.99209700  | -5.23064300 0.69543800  |
| H                                            | -1.27227800  | 5.22881600 -0.07032000  |
| H                                            | 2.17085700   | 0.36444900 4.40308300   |
| H                                            | -4.18162200  | 2.28687000 -3.28958700  |
| H                                            | 1.28890800   | 2.55133300 3.17059400   |
| N                                            | -2.45101400  | 0.36548900 -1.17589800  |
| N                                            | -0.79449700  | 1.97894000 0.55198700   |
| N                                            | 0.25385700   | -0.36780300 1.75202900  |
| N                                            | -1.45292200  | -1.98463200 0.06806800  |
| O                                            | 0.22289600   | -0.13949700 -1.06308000 |
| S                                            | -2.75593800  | 0.04823200 1.93070800   |
| C                                            | 1.51562900   | -0.12841500 -0.71507800 |
| H                                            | 1.48050500   | -0.32910900 0.45413100  |
| C                                            | 3.57458700   | -0.97904600 -1.27802000 |
| C                                            | 4.24666800   | 0.27153800 -1.28439800  |
| C                                            | 3.47696600   | 1.49522200 -1.06163600  |
| H                                            | 1.50643700   | 1.96558200 -0.72861000  |
| O                                            | 3.90893800   | 2.63951100 -1.08212000  |
| N                                            | 2.29582600   | -1.24277000 -1.08496000 |
| N                                            | 2.13998800   | 1.18416600 -0.85779000  |
| C                                            | 5.58329400   | -0.03016900 -1.55726100 |
| H                                            | 6.42533200   | 0.64065200 -1.65298400  |
| N                                            | 4.55541500   | -1.91059900 -1.53431400 |
| N                                            | 5.76181100   | -1.35478100 -1.71524600 |
| H                                            | 4.43759600   | -2.90981600 -1.63094500 |

**<sup>2</sup>T1-PC**

Zero-point correction= 0.391501 (Hartree/Particle)  
 Thermal correction to Energy= 0.420803  
 Thermal correction to Enthalpy= 0.421748  
 Thermal correction to Gibbs Free Energy= 0.330436  
 Sum of electronic and zero-point Energies= -2073.178427  
 Sum of electronic and thermal Energies= -2073.149124  
 Sum of electronic and thermal Enthalpies= -2073.148180  
 Sum of electronic and thermal Free Energies= -2073.239492

|    |             |             |             |
|----|-------------|-------------|-------------|
| C  | -3.10310900 | 1.15454000  | 1.63952600  |
| C  | -4.05500800 | 0.77931700  | 2.66119400  |
| C  | -4.05415200 | -0.57932900 | 2.71825000  |
| C  | 0.39918900  | -2.46138100 | -2.15539500 |
| C  | -1.83885200 | 2.85814500  | 0.37335300  |
| C  | 0.57313400  | 2.38538500  | -2.17612900 |
| C  | -1.91012900 | -2.81113300 | 0.51231700  |
| C  | -1.52633900 | 4.23438500  | 0.06458600  |
| C  | -0.75687100 | -4.22218000 | -0.80765000 |
| C  | -2.80785200 | -2.36731900 | 1.47500600  |
| C  | -0.47090600 | -2.84663400 | -1.14299200 |
| C  | 0.71741000  | -1.15185700 | -2.49532700 |
| C  | 1.62259500  | -0.76996700 | -3.54674500 |
| C  | -2.78261300 | 2.46618900  | 1.31431700  |
| C  | 1.68093200  | 0.59678700  | -3.54805600 |
| C  | -0.30960100 | 2.82290300  | -1.19680300 |
| C  | 0.80847200  | 1.05436800  | -2.49979200 |
| C  | -0.57598800 | 4.21271300  | -0.90786300 |
| C  | -3.10523300 | -1.03483200 | 1.72829300  |
| C  | -1.64708900 | -4.19988000 | 0.22076800  |
| Fe | -1.21574400 | 0.00405100  | -0.41550100 |
| H  | -3.32693400 | -3.11902400 | 2.06174500  |
| H  | -4.63190000 | 1.47967100  | 3.25185900  |
| H  | -1.98772800 | 5.09146800  | 0.53854700  |
| H  | 2.23984300  | 1.24446800  | -4.21218400 |
| H  | -0.32351800 | -5.07971700 | -1.30674200 |
| H  | 1.09535900  | 3.14182200  | -2.75403900 |
| H  | -3.66834300 | -0.79956900 | -1.41126300 |
| H  | -3.30911500 | 3.25280600  | 1.84630600  |
| H  | -0.09440700 | 5.04758300  | -1.40100000 |
| H  | -2.09828900 | -5.03489900 | 0.74157600  |
| H  | 2.12661900  | -1.46364600 | -4.20832200 |
| H  | -4.63057600 | -1.22924000 | 3.36435500  |
| H  | 0.86634300  | -3.25211900 | -2.73475000 |
| N  | -2.54287100 | 0.03534700  | 1.08037700  |
| N  | -1.17605200 | -2.00089800 | -0.31940000 |
| N  | 0.24910800  | -0.02671000 | -1.84277800 |
| N  | -1.07721900 | 2.01322000  | -0.39399000 |
| O  | 0.25516200  | 0.00105900  | 1.36316700  |
| S  | -2.78695600 | 0.04731800  | -1.99083000 |
| C  | 1.48955900  | -0.00367800 | 1.41878400  |
| H  | 1.74599000  | -0.04837800 | -0.59339500 |
| C  | 3.63194700  | -0.03796200 | 0.38679700  |
| C  | 4.32264600  | -0.01163800 | 1.59279800  |
| C  | 3.58850700  | 0.02114600  | 2.84028200  |
| H  | 1.59863000  | 0.04590000  | 3.44738100  |
| O  | 4.02302200  | 0.04667500  | 3.97652200  |
| N  | 2.26892500  | -0.03737500 | 0.28528000  |
| N  | 2.17629600  | 0.02186900  | 2.61422100  |
| C  | 5.69084400  | -0.02477500 | 1.20649500  |
| H  | 6.56324600  | -0.01224600 | 1.84507600  |
| N  | 4.54673100  | -0.06421800 | -0.60020300 |
| N  | 5.83094300  | -0.05606300 | -0.10838700 |
| H  | 4.38995500  | -0.08525900 | -1.59827000 |

**<sup>4</sup>T1-RC**

Zero-point correction= 0.388695 (Hartree/Particle)  
 Thermal correction to Energy= 0.418706  
 Thermal correction to Enthalpy= 0.419651  
 Thermal correction to Gibbs Free Energy= 0.322735  
 Sum of electronic and zero-point Energies= -2073.077745  
 Sum of electronic and thermal Energies= -2073.047734  
 Sum of electronic and thermal Enthalpies= -2073.046790  
 Sum of electronic and thermal Free Energies= -2073.143705

|    |             |             |             |
|----|-------------|-------------|-------------|
| C  | 0.34030700  | -1.25013400 | 2.36850300  |
| C  | 0.79855500  | -2.52257500 | 2.86569400  |
| C  | 0.17962000  | -3.47901500 | 2.12073400  |
| C  | -3.65457300 | 0.03151400  | -2.36203700 |
| C  | 0.33482600  | 1.21977400  | 2.39770700  |
| C  | -1.49926800 | 3.42218900  | 0.32806400  |
| C  | -2.27931200 | -2.77255500 | -0.69126400 |
| C  | 0.77214400  | 2.48193000  | 2.94000500  |
| C  | -3.72062900 | -2.47162800 | -2.39342200 |
| C  | -1.46191900 | -3.41439200 | 0.22586900  |
| C  | -3.27076800 | -1.20583900 | -1.86932900 |
| C  | -3.25820600 | 1.26201000  | -1.85167000 |
| C  | -3.71072000 | 2.53708400  | -2.35099300 |
| C  | 0.75284300  | -0.02073200 | 2.86435800  |
| C  | -3.11457600 | 3.49155500  | -1.58601100 |
| C  | -0.68152700 | 2.77666800  | 1.25057900  |
| C  | -2.29202900 | 2.79893400  | -0.62522900 |
| C  | 0.13707400  | 3.45223800  | 2.22752600  |
| C  | -0.65394400 | -2.78637000 | 1.16961700  |
| C  | -3.10887300 | -3.44188200 | -1.66242700 |
| Fe | -1.36133600 | 0.00794700  | 0.18178300  |
| H  | -1.45153300 | -4.50007100 | 0.20799600  |
| H  | 1.50755200  | -2.64661200 | 3.67356500  |
| H  | 1.47562600  | 2.58989900  | 3.75498700  |
| H  | -3.21060200 | 4.56768400  | -1.65175100 |
| H  | -4.41629700 | -2.58335200 | -3.21509800 |
| H  | -1.51225100 | 4.50772200  | 0.35151800  |
| H  | -3.35329200 | -1.32394200 | 2.01875700  |
| H  | 1.47944200  | -0.02912200 | 3.66913200  |
| H  | 0.20475200  | 4.52683600  | 2.33789200  |
| H  | -3.19597800 | -4.51643400 | -1.75953100 |
| H  | -4.40062400 | 2.66536900  | -3.17507600 |
| H  | 0.26869200  | -4.55534100 | 2.19272200  |
| H  | -4.33893700 | 0.04042200  | -3.20487300 |
| N  | -0.54721900 | -1.43070000 | 1.33810200  |
| N  | -2.40179600 | -1.40668900 | -0.82026000 |
| N  | -2.39751100 | 1.44022800  | -0.79891000 |
| N  | -0.54663600 | 1.42014100  | 1.36996000  |
| O  | -0.10155700 | 0.02310500  | -0.86348400 |
| S  | -3.44789300 | -0.04599200 | 1.58775900  |
| C  | 3.00555300  | 0.05323700  | -2.23569600 |
| H  | 2.12371800  | 0.07412000  | -2.87063200 |
| C  | 5.18329300  | 0.02971200  | -1.84750000 |
| C  | 5.04897800  | -0.00367500 | -0.45198200 |
| C  | 3.72642600  | -0.00933100 | 0.12565500  |
| H  | 1.75455200  | 0.02103400  | -0.62145600 |
| O  | 3.40992700  | -0.03654100 | 1.31006800  |
| N  | 4.19194200  | 0.05903900  | -2.78288500 |
| N  | 2.74494700  | 0.02229100  | -0.89922900 |
| C  | 6.37929600  | -0.02436300 | 0.03890900  |
| H  | 6.71887400  | -0.05170000 | 1.06537300  |
| N  | 6.51593800  | 0.02693900  | -2.09256300 |
| N  | 7.26192300  | -0.00582300 | -0.95119200 |
| H  | 6.97384400  | 0.04614000  | -2.99182400 |

**<sup>4</sup>T1-TS1**

Zero-point correction= 0.387693 (Hartree/Particle)  
 Thermal correction to Energy= 0.416649  
 Thermal correction to Enthalpy= 0.417593  
 Thermal correction to Gibbs Free Energy= 0.327125  
 Sum of electronic and zero-point Energies= -2073.041460  
 Sum of electronic and thermal Energies= -2073.012504  
 Sum of electronic and thermal Enthalpies= -2073.011560  
 Sum of electronic and thermal Free Energies= -2073.102028

|    |             |             |             |
|----|-------------|-------------|-------------|
| C  | -0.40612100 | -2.24139500 | -1.95801800 |
| C  | -0.39252800 | -3.67268000 | -2.15056800 |
| C  | 0.63498600  | -4.15913500 | -1.40469600 |
| C  | 3.13991500  | 1.34562400  | 1.84279500  |
| C  | -1.26458300 | 0.01358000  | -2.48901100 |
| C  | -0.12451000 | 3.12778700  | -1.25591000 |
| C  | 2.85212200  | -2.04141000 | 0.84023800  |
| C  | -2.14053800 | 0.90279300  | -3.21542300 |
| C  | 4.11575100  | -0.91122400 | 2.32122100  |
| C  | 2.31005300  | -3.10981500 | 0.13848500  |
| C  | 3.20412500  | -0.02636000 | 1.63678500  |
| C  | 2.32000400  | 2.22823900  | 1.14781300  |
| C  | 2.33243800  | 3.66234200  | 1.30511800  |
| C  | -1.27924000 | -1.37392000 | -2.59840800 |
| C  | 1.43109300  | 4.16269300  | 0.41519800  |
| C  | -0.71549200 | 2.05393700  | -1.90563000 |
| C  | 0.85856400  | 3.03591000  | -0.27948200 |
| C  | -1.79229500 | 2.17073000  | -2.85873200 |
| C  | 1.24107300  | -3.02708500 | -0.74410800 |
| C  | 3.90358200  | -2.15867900 | 1.82116900  |
| Fe | 0.96468700  | -0.02818500 | -0.41029800 |
| H  | 2.73214600  | -4.09300800 | 0.32179000  |
| H  | -1.08282800 | -4.21395800 | -2.78473600 |
| H  | -2.89999600 | 0.58149600  | -3.91721000 |
| H  | 1.16493200  | 5.19618100  | 0.23405500  |
| H  | 4.82343100  | -0.59876700 | 3.07850900  |
| H  | -0.47490500 | 4.12174600  | -1.51608800 |
| H  | 3.55914200  | 0.71956400  | -1.44362900 |
| H  | -2.01903200 | -1.81289200 | -3.26075000 |
| H  | -2.21268900 | 3.10834100  | -3.19972400 |
| H  | 4.39668700  | -3.08528200 | 2.08560400  |
| H  | 2.96249300  | 4.20001100  | 2.00219600  |
| H  | 0.96349800  | -5.18445100 | -1.29351100 |
| H  | 3.81121700  | 1.76886200  | 2.58387200  |
| N  | 0.59417700  | -1.87195100 | -1.09408300 |
| N  | 2.44391600  | -0.73514700 | 0.73703100  |
| N  | 1.41289400  | 1.86651700  | 0.18410900  |
| N  | -0.40702800 | 0.73243500  | -1.70429000 |
| O  | -0.19657700 | -0.24103200 | 0.82155800  |
| S  | 2.47586200  | 0.42367000  | -2.19657200 |
| C  | -1.33190700 | 0.88520600  | 1.75159400  |
| H  | -0.54294900 | 1.59765800  | 1.96363400  |
| C  | -3.35024900 | 0.51164600  | 0.84982500  |
| C  | -3.72715000 | -0.46721200 | 1.79565200  |
| C  | -2.82846500 | -0.74707900 | 2.89857700  |
| H  | -0.97313900 | -0.13162100 | 3.51224200  |
| O  | -2.97632200 | -1.54605300 | 3.81126000  |
| N  | -2.23668900 | 1.24954400  | 0.81234600  |
| N  | -1.69091700 | 0.08771500  | 2.83130900  |
| C  | -4.98582100 | -0.92597200 | 1.36556000  |
| H  | -5.62168000 | -1.67733400 | 1.81314700  |
| N  | -4.38210400 | 0.57166400  | -0.04101900 |
| N  | -5.37799900 | -0.30106700 | 0.25113700  |
| H  | -4.42137200 | 1.12512600  | -0.88509400 |

**<sup>4</sup>T1-Int1**

Zero-point correction= 0.389106 (Hartree/Particle)  
 Thermal correction to Energy= 0.418462  
 Thermal correction to Enthalpy= 0.419406  
 Thermal correction to Gibbs Free Energy= 0.327191  
 Sum of electronic and zero-point Energies= -2073.066544  
 Sum of electronic and thermal Energies= -2073.037188  
 Sum of electronic and thermal Enthalpies= -2073.036244  
 Sum of electronic and thermal Free Energies= -2073.128459

|    |             |             |             |
|----|-------------|-------------|-------------|
| C  | 1.49616300  | -2.76611700 | 1.08316000  |
| C  | 1.59061200  | -3.54504200 | 2.29457100  |
| C  | 1.48576400  | -2.67259300 | 3.33280900  |
| C  | 0.41738200  | 3.42820100  | 0.36194000  |
| C  | 1.60662500  | -2.54098000 | -1.36296300 |
| C  | 1.38627300  | 0.41739200  | -3.31103600 |
| C  | 0.91837200  | 1.05865000  | 2.95575200  |
| C  | 1.81392500  | -3.08635600 | -2.67934600 |
| C  | 0.40915400  | 3.25042900  | 2.85568400  |
| C  | 1.14331000  | -0.19823200 | 3.49701100  |
| C  | 0.55616700  | 2.69818400  | 1.53345700  |
| C  | 0.60665300  | 2.91880600  | -0.91596600 |
| C  | 0.58483000  | 3.70575800  | -2.12242400 |
| C  | 1.61426800  | -3.28994700 | -0.19469700 |
| C  | 0.88672000  | 2.86378000  | -3.15037500 |
| C  | 1.53701500  | -0.85389000 | -2.77512200 |
| C  | 1.07924500  | 1.55594400  | -2.58043300 |
| C  | 1.77922000  | -2.04147400 | -3.55245700 |
| C  | 1.31405500  | -1.35947400 | 2.75886900  |
| C  | 0.64217800  | 2.23805800  | 3.73562500  |
| Fe | 1.09652000  | 0.08138600  | 0.08807800  |
| H  | 1.15318200  | -0.28345400 | 4.57874200  |
| H  | 1.72792600  | -4.61836200 | 2.32427300  |
| H  | 1.96874100  | -4.13679100 | -2.88977700 |
| H  | 0.97204500  | 3.09129000  | -4.20519200 |
| H  | 0.15607600  | 4.28200800  | 3.06383200  |
| H  | 1.49772900  | 0.52533000  | -4.38501500 |
| H  | 3.35888500  | 1.64814500  | 0.65976900  |
| H  | 1.75771900  | -4.36151400 | -0.28784900 |
| H  | 1.89519200  | -2.05659600 | -4.62855000 |
| H  | 0.61743200  | 2.26490200  | 4.81741400  |
| H  | 0.37495000  | 4.76704200  | -2.15841200 |
| H  | 1.51345200  | -2.87859900 | 4.39511800  |
| H  | 0.17687300  | 4.48235300  | 0.45257100  |
| N  | 1.32041100  | -1.44169500 | 1.39135700  |
| N  | 0.87452900  | 1.36243400  | 1.61576900  |
| N  | 0.88829300  | 1.60654400  | -1.21781900 |
| N  | 1.43621900  | -1.18012500 | -1.44286800 |
| O  | -0.71300700 | -0.27633200 | 0.08952800  |
| S  | 3.37750900  | 0.41944900  | 0.09803900  |
| C  | -1.62475000 | -0.17725300 | -0.96427400 |
| H  | -1.10423100 | -0.11099100 | -1.92459200 |
| C  | -3.58935300 | -1.30655500 | -0.45147900 |
| C  | -4.28003900 | -0.14114000 | -0.00443000 |
| C  | -3.63479900 | 1.16598600  | -0.16039800 |
| H  | -1.88963700 | 1.90804100  | -0.85377400 |
| O  | -4.11244700 | 2.23924400  | 0.19051500  |
| N  | -2.39282000 | -1.41976500 | -0.96955400 |
| N  | -2.42846600 | 1.04921100  | -0.82407200 |
| C  | -5.51109500 | -0.59184200 | 0.46003600  |
| H  | -6.32889900 | -0.02241400 | 0.87922100  |
| N  | -4.47562900 | -2.34254000 | -0.22594900 |
| N  | -5.62895600 | -1.93215100 | 0.32934500  |
| H  | -4.31592700 | -3.32603200 | -0.39130900 |

**<sup>4</sup>T1-TS2**

Zero-point correction= 0.382729 (Hartree/Particle)  
 Thermal correction to Energy= 0.412159  
 Thermal correction to Enthalpy= 0.413103  
 Thermal correction to Gibbs Free Energy= 0.321362  
 Sum of electronic and zero-point Energies= -2073.048915  
 Sum of electronic and thermal Energies= -2073.019485  
 Sum of electronic and thermal Enthalpies= -2073.018541  
 Sum of electronic and thermal Free Energies= -2073.110282

|    |             |             |             |
|----|-------------|-------------|-------------|
| C  | -3.13554100 | -1.11592900 | -1.75768400 |
| C  | -4.12939600 | -0.68892400 | -2.71364900 |
| C  | -4.15304800 | 0.67145800  | -2.67216200 |
| C  | 0.53340000  | 2.35039800  | 2.09075600  |
| C  | -1.90662500 | -2.87016700 | -0.53000300 |
| C  | 0.56313600  | -2.49034000 | 1.99936400  |
| C  | -1.98198200 | 2.79760100  | -0.38403200 |
| C  | -1.59902300 | -4.25206800 | -0.26356200 |
| C  | -0.74106700 | 4.15726000  | 0.91253500  |
| C  | -2.90402400 | 2.39128000  | -1.33907000 |
| C  | -0.42185700 | 2.77451800  | 1.16425200  |
| C  | 0.88471300  | 1.03900800  | 2.34710800  |
| C  | 1.75834400  | 0.59671800  | 3.39481900  |
| C  | -2.82792300 | -2.44154900 | -1.47541300 |
| C  | 1.76169700  | -0.76954400 | 3.37514700  |
| C  | -0.37064500 | -2.88707400 | 1.04036700  |
| C  | 0.89293700  | -1.18587700 | 2.31280300  |
| C  | -0.64932000 | -4.26283100 | 0.71322200  |
| C  | -3.17221800 | 1.07420800  | -1.69243400 |
| C  | -1.70796800 | 4.17103300  | -0.04816000 |
| Fe | -1.18888000 | -0.04981000 | 0.32323700  |
| H  | -3.46429900 | 3.16826700  | -1.84979800 |
| H  | -4.72516900 | -1.35594800 | -3.32342600 |
| H  | -2.05742000 | -5.09286700 | -0.76811000 |
| H  | 2.29104700  | -1.44425400 | 4.03591800  |
| H  | -0.27259600 | 4.99697400  | 1.40946900  |
| H  | 1.05392000  | -3.27718100 | 2.56402700  |
| H  | -2.90315100 | -1.32812800 | 2.29031900  |
| H  | -3.35651700 | -3.20639800 | -2.03584600 |
| H  | -0.16527900 | -5.11457600 | 1.17370400  |
| H  | -2.19815700 | 5.02465900  | -0.49826300 |
| H  | 2.28375400  | 1.25533400  | 4.07456600  |
| H  | -4.77219300 | 1.35327100  | -3.24091500 |
| H  | 1.01854100  | 3.11951200  | 2.68365000  |
| N  | -2.55789000 | -0.02795200 | -1.16012600 |
| N  | -1.18753300 | 1.96262700  | 0.36809200  |
| N  | 0.41353000  | -0.06501900 | 1.63061300  |
| N  | -1.15306900 | -2.05559400 | 0.28327100  |
| O  | 0.24825500  | 0.00040400  | -1.23671300 |
| S  | -2.78587800 | 0.00744700  | 2.11966600  |
| C  | 1.52526700  | 0.03018100  | -0.92449900 |
| H  | 1.48025100  | -0.08059600 | 0.27563600  |
| C  | 3.62718600  | -0.85496500 | -1.22737000 |
| C  | 4.29548700  | 0.39442700  | -1.27895800 |
| C  | 3.50986000  | 1.62662200  | -1.24319100 |
| H  | 1.51989400  | 2.11814400  | -1.14559800 |
| O  | 3.94204200  | 2.76986300  | -1.31619500 |
| N  | 2.33078200  | -1.11581700 | -1.14111500 |
| N  | 2.15686200  | 1.32983900  | -1.15540900 |
| C  | 5.65496400  | 0.08134900  | -1.39044700 |
| H  | 6.50027600  | 0.75147500  | -1.46184000 |
| N  | 4.62719000  | -1.79484100 | -1.29905900 |
| N  | 5.85202700  | -1.24694500 | -1.41362600 |
| H  | 4.51822900  | -2.79876600 | -1.32596600 |

**<sup>4</sup>T1-PC**

Zero-point correction= 0.390063 (Hartree/Particle)  
 Thermal correction to Energy= 0.420479  
 Thermal correction to Enthalpy= 0.421423  
 Thermal correction to Gibbs Free Energy= 0.324396  
 Sum of electronic and zero-point Energies= -2073.179926  
 Sum of electronic and thermal Energies= -2073.149511  
 Sum of electronic and thermal Enthalpies= -2073.148566  
 Sum of electronic and thermal Free Energies= -2073.245593

|    |             |             |             |
|----|-------------|-------------|-------------|
| C  | -3.18281200 | 0.58371200  | 2.00217600  |
| C  | -4.06522600 | -0.08973100 | 2.92346900  |
| C  | -4.02424500 | -1.41169700 | 2.60934000  |
| C  | 0.43278800  | -1.82499100 | -2.59821000 |
| C  | -2.09036900 | 2.60649300  | 1.13879200  |
| C  | 0.32085700  | 2.87960700  | -1.44427200 |
| C  | -1.93852000 | -2.89062600 | -0.18761700 |
| C  | -1.83415300 | 4.02162000  | 1.17726000  |
| C  | -0.69824500 | -3.89036800 | -1.77636100 |
| C  | -2.81930100 | -2.74760400 | 0.87469600  |
| C  | -0.46696800 | -2.47055900 | -1.76369800 |
| C  | 0.70957200  | -0.46619500 | -2.56420700 |
| C  | 1.62215200  | 0.20299200  | -3.45057800 |
| C  | -2.95710700 | 1.95011700  | 2.00016200  |
| C  | 1.59194300  | 1.53131000  | -3.12298800 |
| C  | -0.60380600 | 3.02627700  | -0.42159300 |
| C  | 0.66060800  | 1.67252000  | -2.03728200 |
| C  | -0.91239700 | 4.28223300  | 0.20929000  |
| C  | -3.11779000 | -1.54570100 | 1.49506900  |
| C  | -1.60962700 | -4.15083100 | -0.79806400 |
| Fe | -1.47288400 | 0.10243200  | -0.47195300 |
| H  | -3.29875800 | -3.64430400 | 1.25378100  |
| H  | -4.63031900 | 0.40292900  | 3.70416700  |
| H  | -2.30138100 | 4.71178400  | 1.86784600  |
| H  | 2.12600500  | 2.35117100  | -3.58706600 |
| H  | -0.20862300 | -4.58629700 | -2.44547100 |
| H  | 0.81198800  | 3.77570800  | -1.80975200 |
| H  | -3.41337000 | -0.75133100 | -2.37508700 |
| H  | -3.48472000 | 2.54975400  | 2.73473300  |
| H  | -0.46571500 | 5.23081900  | -0.05966900 |
| H  | -2.02351400 | -5.10504300 | -0.49838700 |
| H  | 2.18656800  | -0.28368400 | -4.23630200 |
| H  | -4.54861500 | -2.23489800 | 3.07728400  |
| H  | 0.96003500  | -2.42792100 | -3.33055000 |
| N  | -2.60826700 | -0.31983200 | 1.14067500  |
| N  | -1.24036200 | -1.86776600 | -0.79210800 |
| N  | 0.14735200  | 0.43881500  | -1.68307400 |
| N  | -1.33603800 | 2.00847300  | 0.15353000  |
| O  | 0.82206500  | -0.58901800 | 2.27887100  |
| S  | -3.19153700 | 0.54132800  | -2.04666400 |
| C  | 1.98121600  | -0.47744900 | 1.91181900  |
| H  | 1.54568800  | 0.03688900  | -0.03740900 |
| C  | 3.63070300  | -0.00986000 | 0.23690300  |
| C  | 4.70513800  | -0.22694800 | 1.09301500  |
| C  | 4.46422600  | -0.59901600 | 2.47132000  |
| H  | 2.83115000  | -0.94664400 | 3.69874600  |
| O  | 5.28189900  | -0.82415000 | 3.34687600  |
| N  | 2.31765700  | -0.12371000 | 0.60713000  |
| N  | 3.07150900  | -0.68959500 | 2.74825200  |
| C  | 5.84767200  | 0.00355400  | 0.28050100  |
| H  | 6.88914700  | -0.06059100 | 0.56428900  |
| N  | 4.13895000  | 0.31850300  | -0.96651800 |
| N  | 5.51467600  | 0.33100500  | -0.95722200 |
| H  | 3.63610100  | 0.53810800  | -1.81801200 |



**<sup>2</sup>T2-RC**

Zero-point correction= 0.388545 (Hartree/Particle)  
 Thermal correction to Energy= 0.418636  
 Thermal correction to Enthalpy= 0.419580  
 Thermal correction to Gibbs Free Energy= 0.322104  
 Sum of electronic and zero-point Energies= -2073.070208  
 Sum of electronic and thermal Energies= -2073.040117  
 Sum of electronic and thermal Enthalpies= -2073.039173  
 Sum of electronic and thermal Free Energies= -2073.136649

|    |             |             |             |
|----|-------------|-------------|-------------|
| C  | -0.32559700 | 1.24589400  | 2.38341300  |
| C  | -0.78173900 | 2.51776900  | 2.88343000  |
| C  | -0.17052700 | 3.47459100  | 2.13263000  |
| C  | 3.63026700  | -0.02783200 | -2.38182700 |
| C  | -0.30806300 | -1.22293000 | 2.41759400  |
| C  | 1.51683400  | -3.42244500 | 0.33525800  |
| C  | 2.26134300  | 2.77397100  | -0.70319100 |
| C  | -0.72989800 | -2.48592000 | 2.96925800  |
| C  | 3.67907400  | 2.47563100  | -2.42530600 |
| C  | 1.45176200  | 3.41315400  | 0.22246900  |
| C  | 3.24619100  | 1.20903700  | -1.88851200 |
| C  | 3.24395500  | -1.25866500 | -1.86483900 |
| C  | 3.69346900  | -2.53272600 | -2.37013500 |
| C  | -0.72978800 | 0.01594400  | 2.88420400  |
| C  | 3.10901600  | -3.48892100 | -1.59855700 |
| C  | 0.70746000  | -2.77740500 | 1.26543600  |
| C  | 2.29672700  | -2.79823500 | -0.62755500 |
| C  | -0.09546600 | -3.45452700 | 2.25369700  |
| C  | 0.65604800  | 2.78280800  | 1.17489700  |
| C  | 3.07141900  | 3.44494000  | -1.68972900 |
| Fe | 1.35720900  | -0.01085900 | 0.18437400  |
| H  | 1.43462700  | 4.49869900  | 0.20228200  |
| H  | -1.48378800 | 2.64135100  | 3.69743900  |
| H  | -1.42248900 | -2.59601800 | 3.79330500  |
| H  | 3.20607100  | -4.56482000 | -1.66644200 |
| H  | 4.36060700  | 2.58841800  | -3.25860400 |
| H  | 1.53296900  | -4.50787700 | 0.36045900  |
| H  | 3.37931700  | 1.34552300  | 2.00241100  |
| H  | -1.44912100 | 0.02262800  | 3.69562000  |
| H  | -0.15367100 | -4.52914400 | 2.36925700  |
| H  | 3.14847700  | 4.51960700  | -1.79384600 |
| H  | 4.37286300  | -2.65890200 | -3.20323200 |
| H  | -0.26060800 | 4.55085900  | 2.20441000  |
| H  | 4.30293700  | -0.03613300 | -3.23401200 |
| N  | 0.55348500  | 1.42681800  | 1.34608200  |
| N  | 2.39335400  | 1.40870200  | -0.82628000 |
| N  | 2.39763200  | -1.43940300 | -0.80099600 |
| N  | 0.56498900  | -1.42090800 | 1.38143500  |
| O  | 0.11088200  | -0.01809000 | -0.87203800 |
| S  | 3.48649400  | 0.06942100  | 1.56872300  |
| C  | -3.03656000 | -0.07373300 | -2.25863400 |
| H  | -2.15404400 | -0.10247700 | -2.89336600 |
| C  | -5.23846200 | -0.05329300 | -1.87935100 |
| C  | -5.04726200 | 0.00680800  | -0.46398600 |
| C  | -3.71480600 | 0.02846000  | 0.10716000  |
| H  | -1.75991400 | -0.00782400 | -0.64826200 |
| O  | -3.41055400 | 0.07838400  | 1.29549400  |
| N  | -4.21420400 | -0.09458600 | -2.79976100 |
| N  | -2.75227200 | -0.01677600 | -0.91339800 |
| C  | -6.32564100 | 0.03206500  | 0.06995100  |
| H  | -6.68517500 | 0.07618600  | 1.08751200  |
| N  | -6.53629100 | -0.06455900 | -2.20328100 |
| N  | -7.15486400 | -0.01187100 | -0.99781700 |
| H  | -8.16435800 | -0.00937700 | -0.98440500 |

**<sup>2</sup>T2-TS1**

Zero-point correction= 0.386854 (Hartree/Particle)  
 Thermal correction to Energy= 0.416160  
 Thermal correction to Enthalpy= 0.417104  
 Thermal correction to Gibbs Free Energy= 0.325467  
 Sum of electronic and zero-point Energies= -2073.031318  
 Sum of electronic and thermal Energies= -2073.002012  
 Sum of electronic and thermal Enthalpies= -2073.001068  
 Sum of electronic and thermal Free Energies= -2073.092705

|    |             |             |             |
|----|-------------|-------------|-------------|
| C  | 0.50640800  | -1.66604600 | 2.47837300  |
| C  | 0.66619700  | -3.02787800 | 2.92917300  |
| C  | -0.18593600 | -3.78595600 | 2.18580800  |
| C  | -3.10119300 | 0.66719500  | -2.13717900 |
| C  | 1.06615800  | 0.74462500  | 2.58853200  |
| C  | -0.31074100 | 3.40463100  | 0.71847600  |
| C  | -2.43007700 | -2.43735900 | -0.57589100 |
| C  | 1.76837600  | 1.85448100  | 3.19060300  |
| C  | -3.72640500 | -1.75959400 | -2.28655000 |
| C  | -1.79716200 | -3.27629400 | 0.33079400  |
| C  | -3.00846100 | -0.64916300 | -1.70501000 |
| C  | -2.45898000 | 1.76148900  | -1.56791000 |
| C  | -2.65004300 | 3.12701200  | -1.98952100 |
| C  | 1.20539400  | -0.57729600 | 2.99156700  |
| C  | -1.88354400 | 3.90347900  | -1.17406200 |
| C  | 0.36897600  | 2.54783000  | 1.57586200  |
| C  | -1.21361500 | 3.01145400  | -0.26220700 |
| C  | 1.32918800  | 2.97736500  | 2.56479800  |
| C  | -0.85881200 | -2.88376600 | 1.28192600  |
| C  | -3.37165500 | -2.86801500 | -1.58257800 |
| Fe | -0.92277300 | 0.05189600  | 0.42520300  |
| H  | -2.04066200 | -4.33363300 | 0.28265700  |
| H  | 1.34437900  | -3.34389500 | 3.71148800  |
| H  | 2.49545700  | 1.76406700  | 3.98709700  |
| H  | -1.77018000 | 4.97995300  | -1.17852300 |
| H  | -4.41100200 | -1.68141200 | -3.12149800 |
| H  | -0.10738400 | 4.46721300  | 0.81089300  |
| H  | -3.15789100 | -0.89891600 | 2.13314700  |
| H  | 1.91685300  | -0.77787200 | 3.78717200  |
| H  | 1.62062500  | 4.00562900  | 2.73518400  |
| H  | -3.70156500 | -3.88968600 | -1.72114100 |
| H  | -3.29917200 | 3.43591300  | -2.79894300 |
| H  | -0.35215100 | -4.85477500 | 2.22832800  |
| H  | -3.76137400 | 0.86661900  | -2.97629100 |
| N  | -0.43082900 | -1.59874600 | 1.48428700  |
| N  | -2.23186000 | -1.08015700 | -0.65786900 |
| N  | -1.57440000 | 1.70907100  | -0.51545600 |
| N  | 0.22406000  | 1.18783900  | 1.60348900  |
| O  | 0.29883500  | -0.33495900 | -0.72688500 |
| S  | -2.91962200 | 0.39074100  | 1.80563800  |
| C  | 1.37923000  | 0.77282300  | -1.69307300 |
| H  | 0.59109700  | 1.47891000  | -1.93052300 |
| C  | 3.42626300  | 0.44173800  | -0.77990500 |
| C  | 3.75947800  | -0.56798600 | -1.74029700 |
| C  | 2.84521000  | -0.88885000 | -2.82586200 |
| H  | 0.98289100  | -0.30689400 | -3.41819800 |
| O  | 2.99905400  | -1.72589100 | -3.70509500 |
| N  | 2.28084500  | 1.16943900  | -0.77905700 |
| N  | 1.72298400  | -0.05723200 | -2.77291000 |
| C  | 5.00434200  | -1.02766200 | -1.36659800 |
| H  | 5.65408400  | -1.78147900 | -1.78652400 |
| N  | 4.41017300  | 0.59615300  | 0.12911700  |
| N  | 5.33614100  | -0.30584400 | -0.26358100 |
| H  | 6.18755800  | -0.37729100 | 0.27431300  |

## <sup>2</sup>T2-Int

|                                              |                             |             |             |
|----------------------------------------------|-----------------------------|-------------|-------------|
| Zero-point correction=                       | 0.387901 (Hartree/Particle) |             |             |
| Thermal correction to Energy=                | 0.417192                    |             |             |
| Thermal correction to Enthalpy=              | 0.418136                    |             |             |
| Thermal correction to Gibbs Free Energy=     | 0.327087                    |             |             |
| Sum of electronic and zero-point Energies=   | -2073.055734                |             |             |
| Sum of electronic and thermal Energies=      | -2073.026444                |             |             |
| Sum of electronic and thermal Enthalpies=    | -2073.025499                |             |             |
| Sum of electronic and thermal Free Energies= | -2073.116548                |             |             |
| C                                            | 0.49903500                  | 1.68766600  | 2.51037200  |
| C                                            | 0.91521900                  | 1.53192700  | 3.88492400  |
| C                                            | 0.41476100                  | 0.33931900  | 4.30805700  |
| C                                            | -2.80837400                 | -2.18471300 | -1.19053200 |
| C                                            | 0.41787700                  | 2.98270000  | 0.39336500  |
| C                                            | -1.17792300                 | 2.13279100  | -2.64186300 |
| C                                            | -1.63921000                 | -2.02873100 | 2.14137600  |
| C                                            | 0.74075100                  | 4.15540700  | -0.38377200 |
| C                                            | -2.79585800                 | -3.52857600 | 0.92970500  |
| C                                            | -0.96279900                 | -1.45113200 | 3.21049300  |
| C                                            | -2.46206000                 | -2.36156400 | 0.14476800  |
| C                                            | -2.53813000                 | -1.06536000 | -1.97218900 |
| C                                            | -2.97130800                 | -0.89928500 | -3.33844600 |
| C                                            | 0.80188100                  | 2.79060100  | 1.71702800  |
| C                                            | -2.52555300                 | 0.32056000  | -3.74809000 |
| C                                            | -0.47868500                 | 2.69254000  | -1.57530700 |
| C                                            | -1.81417200                 | 0.89550500  | -2.63374500 |
| C                                            | 0.18133000                  | 3.97549500  | -1.61045800 |
| C                                            | -0.30137900                 | -0.22504000 | 3.18798500  |
| C                                            | -2.28793500                 | -3.31937400 | 2.17370200  |
| Fe                                           | -0.99955700                 | 0.31087100  | 0.26814200  |
| H                                            | -0.93589500                 | -2.01061700 | 4.14108200  |
| H                                            | 1.51074800                  | 2.24897300  | 4.43517200  |
| H                                            | 1.32345400                  | 4.99314400  | -0.02326800 |
| H                                            | -2.65546800                 | 0.79768900  | -4.71098500 |
| H                                            | -3.34742400                 | -4.38373200 | 0.56072600  |
| H                                            | -1.22622600                 | 2.70963700  | -3.56090600 |
| H                                            | -3.23096900                 | 2.12784800  | -0.07801700 |
| H                                            | 1.39568900                  | 3.57669400  | 2.17414300  |
| H                                            | 0.20655800                  | 4.63452100  | -2.46871600 |
| H                                            | -2.33330200                 | -3.96722500 | 3.03963400  |
| H                                            | -3.54507100                 | -1.62863800 | -3.89582300 |
| H                                            | 0.51227200                  | -0.12891200 | 5.27909200  |
| H                                            | -3.36449400                 | -2.98888800 | -1.66394000 |
| N                                            | -0.23877900                 | 0.60981400  | 2.10814400  |
| N                                            | -1.76335000                 | -1.45933600 | 0.90283100  |
| N                                            | -1.83572500                 | 0.04013900  | -1.55726500 |
| N                                            | -0.32364100                 | 2.10323800  | -0.34764900 |
| O                                            | 0.54512300                  | -0.64165200 | -0.19144500 |
| S                                            | -3.10289000                 | 1.19290700  | 0.89058400  |
| C                                            | 1.33649800                  | -0.40167500 | -1.30529300 |
| H                                            | 0.77514800                  | 0.08194200  | -2.11320500 |
| C                                            | 3.56014800                  | -0.07734700 | -0.61391700 |
| C                                            | 3.88359400                  | -1.46656300 | -0.80951400 |
| C                                            | 2.92390400                  | -2.37974600 | -1.44002100 |
| H                                            | 1.04653300                  | -2.30750000 | -2.15734200 |
| O                                            | 3.11360200                  | -3.57529600 | -1.64142700 |
| N                                            | 2.40804400                  | 0.51404600  | -0.91689300 |
| N                                            | 1.79724100                  | -1.70026700 | -1.84663300 |
| C                                            | 5.16647000                  | -1.61023300 | -0.35650600 |
| H                                            | 5.82548100                  | -2.46500500 | -0.30962300 |
| N                                            | 4.61971100                  | 0.59293700  | -0.06570300 |
| N                                            | 5.55026200                  | -0.36419400 | 0.07077000  |
| H                                            | 6.44307500                  | -0.10919200 | 0.46797900  |

## <sup>2</sup>T2-TS2

|                                              |                             |             |             |
|----------------------------------------------|-----------------------------|-------------|-------------|
| Zero-point correction=                       | 0.384175 (Hartree/Particle) |             |             |
| Thermal correction to Energy=                | 0.412814                    |             |             |
| Thermal correction to Enthalpy=              | 0.413759                    |             |             |
| Thermal correction to Gibbs Free Energy=     | 0.324683                    |             |             |
| Sum of electronic and zero-point Energies=   | -2073.047200                |             |             |
| Sum of electronic and thermal Energies=      | -2073.018561                |             |             |
| Sum of electronic and thermal Enthalpies=    | -2073.017616                |             |             |
| Sum of electronic and thermal Free Energies= | -2073.106692                |             |             |
| C                                            | 2.68041400                  | 1.79680200  | -1.66390200 |
| C                                            | 3.65752300                  | 1.72096200  | -2.72612000 |
| C                                            | 3.99411900                  | 0.40775300  | -2.85066800 |
| C                                            | 0.13810300                  | -2.77174700 | 1.85918900  |
| C                                            | 1.13221900                  | 3.09488300  | -0.22442200 |
| C                                            | -0.94174000                 | 1.91980200  | 2.39713300  |
| C                                            | 2.50541000                  | -2.40245600 | -0.75436400 |
| C                                            | 0.55158200                  | 4.34617900  | 0.20861000  |
| C                                            | 1.66689400                  | -4.13726500 | 0.40689200  |
| C                                            | 3.26054200                  | -1.68891900 | -1.67730200 |
| C                                            | 1.08401900                  | -2.88564900 | 0.83607500  |
| C                                            | -0.43949800                 | -1.60091100 | 2.31977200  |
| C                                            | -1.32061300                 | -1.49486600 | 3.45086200  |
| C                                            | 2.07625500                  | 2.97905200  | -1.23245800 |
| C                                            | -1.61479300                 | -0.17284900 | 3.61647300  |
| C                                            | -0.22696700                 | 2.61758900  | 1.41741700  |
| C                                            | -0.92426600                 | 0.55021900  | 2.58479500  |
| C                                            | -0.29137400                 | 4.04988200  | 1.23345400  |
| C                                            | 3.21847600                  | -0.31006400 | -1.86577700 |
| C                                            | 2.55316200                  | -3.83554900 | -0.58156800 |
| Fe                                           | 1.13695600                  | 0.11771900  | 0.32565000  |
| H                                            | 3.93479000                  | -2.25618200 | -2.31246700 |
| H                                            | 4.02329100                  | 2.56857500  | -3.29150200 |
| H                                            | 0.77514900                  | 5.31263300  | -0.22473400 |
| H                                            | -2.23674200                 | 0.28388100  | 4.37577600  |
| H                                            | 1.42044900                  | -5.10729100 | 0.81961000  |
| H                                            | -1.55377700                 | 2.50708300  | 3.07510900  |
| H                                            | 3.79382700                  | -0.13027600 | 1.25582300  |
| H                                            | 2.37679100                  | 3.89486300  | -1.73318300 |
| H                                            | -0.90876100                 | 4.72042000  | 1.81721600  |
| H                                            | 3.18465200                  | -4.50645700 | -1.14993600 |
| H                                            | -1.65268400                 | -2.33293900 | 4.05046700  |
| H                                            | 4.69281800                  | -0.04842900 | -3.54034000 |
| H                                            | -0.14541400                 | -3.68950400 | 2.36639500  |
| N                                            | 2.43247800                  | 0.55597700  | -1.15471100 |
| N                                            | 1.60651800                  | -1.84754900 | 0.12006400  |
| N                                            | -0.23688300                 | -0.34101300 | 1.76073200  |
| N                                            | 0.63419500                  | 2.05783400  | 0.52476300  |
| O                                            | -0.19500100                 | -0.12868200 | -1.05574300 |
| S                                            | 2.72856000                  | 0.31296900  | 1.96046900  |
| C                                            | -1.49186700                 | -0.23594700 | -0.72998600 |
| H                                            | -1.47168100                 | -0.33639700 | 0.45040900  |
| C                                            | -3.60581200                 | 0.67272700  | -1.01534900 |
| C                                            | -4.19155800                 | -0.58954600 | -1.37885500 |
| C                                            | -3.36499300                 | -1.79110700 | -1.52178100 |
| H                                            | -1.37206100                 | -2.23959500 | -1.33399100 |
| O                                            | -3.75607900                 | -2.89710700 | -1.87261200 |
| N                                            | -2.30970700                 | 0.90531600  | -0.78361000 |
| N                                            | -2.04958500                 | -1.49239500 | -1.23222200 |
| C                                            | -5.52742500                 | -0.33066400 | -1.55366000 |
| H                                            | -6.35795000                 | -0.96124700 | -1.83462000 |
| N                                            | -4.55244400                 | 1.65138700  | -0.96448400 |
| N                                            | -5.67389500                 | 1.00637200  | -1.29713400 |
| H                                            | -6.53348900                 | 1.53760000  | -1.33813300 |

## <sup>2</sup>T2-PC

Zero-point correction= 0.391550 (Hartree/Particle)  
Thermal correction to Energy= 0.420959  
Thermal correction to Enthalpy= 0.421904  
Thermal correction to Gibbs Free Energy= 0.329199  
Sum of electronic and zero-point Energies= -2073.180822  
Sum of electronic and thermal Energies= -2073.151413  
Sum of electronic and thermal Enthalpies= -2073.150468  
Sum of electronic and thermal Free Energies= -2073.243173

|    |             |             |             |
|----|-------------|-------------|-------------|
| C  | -3.16056600 | 0.53919100  | -1.85825300 |
| C  | -3.92576000 | 1.63373700  | -2.41050200 |
| C  | -3.62907500 | 2.73434100  | -1.66773500 |
| C  | 0.65074100  | 0.39481400  | 3.15860500  |
| C  | -2.37431800 | -1.80180700 | -1.91411600 |
| C  | -0.07126000 | -3.40799200 | 0.24235700  |
| C  | -1.26743300 | 2.73507600  | 1.30946300  |
| C  | -2.35653200 | -3.12001000 | -2.50531100 |
| C  | -0.00139700 | 2.81133500  | 3.16870600  |
| C  | -2.14353200 | 3.14349000  | 0.31190500  |
| C  | -0.02206800 | 1.48036700  | 2.60977100  |
| C  | 0.68486100  | -0.88790600 | 2.62549300  |
| C  | 1.39680600  | -2.00016400 | 3.20165500  |
| C  | -3.15000300 | -0.74825800 | -2.38017400 |
| C  | 1.21389400  | -3.06389300 | 2.36827000  |
| C  | -0.96019000 | -3.00057200 | -0.74458800 |
| C  | 0.38325500  | -2.60881900 | 1.28375600  |
| C  | -1.47534700 | -3.86265200 | -1.78260400 |
| C  | -2.68883200 | 2.31040700  | -0.65657600 |
| C  | -0.76898500 | 3.59076300  | 2.35872800  |
| Fe | -1.23508700 | -0.16445400 | 0.36516800  |
| H  | -2.44451700 | 4.18677000  | 0.30483100  |
| H  | -4.59035200 | 1.55244200  | -3.26145900 |
| H  | -2.94822700 | -3.41867900 | -3.36150000 |
| H  | 1.59429900  | -4.07224700 | 2.47155800  |
| H  | 0.53577800  | 3.09367900  | 4.06546800  |
| H  | 0.25931100  | -4.44208400 | 0.22370700  |
| H  | -3.52595900 | 0.40851100  | 1.80821900  |
| H  | -3.78893500 | -0.94256400 | -3.23643900 |
| H  | -1.19387900 | -4.89926900 | -1.91858100 |
| H  | -0.99554500 | 4.64531100  | 2.45339000  |
| H  | 1.96177900  | -1.95777900 | 4.12422500  |
| H  | -4.00042000 | 3.74529900  | -1.77911300 |
| H  | 1.19857100  | 0.56408100  | 4.08069500  |
| N  | -2.42066600 | 0.97128200  | -0.78782500 |
| N  | -0.78988500 | 1.45631100  | 1.46972800  |
| N  | 0.08662400  | -1.27064000 | 1.44076400  |
| N  | -1.51003000 | -1.74723600 | -0.85007100 |
| O  | 0.33642000  | 0.51471900  | -1.12129400 |
| S  | -2.90462500 | -0.78839300 | 1.70022500  |
| C  | 1.56941900  | 0.52993800  | -1.16728800 |
| H  | 1.88879300  | -0.50336900 | 0.55636900  |
| C  | 3.74410500  | 0.01554500  | -0.30687000 |
| C  | 4.38078700  | 0.65586900  | -1.39853200 |
| C  | 3.61254700  | 1.28077700  | -2.46072600 |
| H  | 1.61207200  | 1.56168600  | -2.91998800 |
| O  | 4.03215800  | 1.85981800  | -3.44660400 |
| N  | 2.36881700  | -0.03877400 | -0.21218200 |
| N  | 2.22444200  | 1.14596600  | -2.22677600 |
| C  | 5.73545100  | 0.50293300  | -1.14056100 |
| H  | 6.60812700  | 0.82463300  | -1.68933200 |
| N  | 4.59840800  | -0.49834500 | 0.56627400  |
| N  | 5.80888600  | -0.17890700 | 0.02035400  |
| H  | 6.64117400  | -0.46926900 | 0.51210600  |

## <sup>4</sup>T2-RC

Zero-point correction= 0.388637 (Hartree/Particle)  
Thermal correction to Energy= 0.418636  
Thermal correction to Enthalpy= 0.419580  
Thermal correction to Gibbs Free Energy= 0.321728  
Sum of electronic and zero-point Energies= -2073.070016  
Sum of electronic and thermal Energies= -2073.040016  
Sum of electronic and thermal Enthalpies= -2073.039072  
Sum of electronic and thermal Free Energies= -2073.136924

|    |             |             |             |
|----|-------------|-------------|-------------|
| C  | 0.33678400  | -1.25744100 | 2.36306100  |
| C  | 0.79774600  | -2.53114900 | 2.85453000  |
| C  | 0.18113600  | -3.48557300 | 2.10509000  |
| C  | -3.65687100 | 0.03685700  | -2.36481800 |
| C  | 0.32456100  | 1.21235800  | 2.40455000  |
| C  | -1.51491000 | 3.41999000  | 0.34485900  |
| C  | -2.27758900 | -2.77164100 | -0.70510100 |
| C  | 0.75759800  | 2.47313800  | 2.95358600  |
| C  | -3.71650600 | -2.46620700 | -2.40846300 |
| C  | -1.45966800 | -3.41585100 | 0.20977000  |
| C  | -3.27096400 | -1.20180100 | -1.87719400 |
| C  | -3.26445200 | 1.26587700  | -1.84785200 |
| C  | -3.71899600 | 2.54224800  | -2.34235800 |
| C  | 0.74604300  | -0.02929800 | 2.86472700  |
| C  | -3.12679400 | 3.49452500  | -1.57179200 |
| C  | -0.69634300 | 2.77205100  | 1.26519100  |
| C  | -2.30450900 | 2.79933900  | -0.61247100 |
| C  | 0.11976400  | 3.44518400  | 2.24589600  |
| C  | -0.65381100 | -2.79035000 | 1.15703400  |
| C  | -3.10365500 | -3.43839600 | -1.68110000 |
| Fe | -1.36740200 | 0.00695800  | 0.18207500  |
| H  | -1.44627800 | -4.50139100 | 0.18634400  |
| H  | 1.50666500  | -2.65735800 | 3.66215900  |
| H  | 1.45974000  | 2.57926200  | 3.77002400  |
| H  | -3.22478200 | 4.57073400  | -1.63313500 |
| H  | -4.40981100 | -2.57563300 | -3.23243300 |
| H  | -1.53039600 | 4.50537300  | 0.37322200  |
| H  | -3.35999600 | -1.34150600 | 2.01044200  |
| H  | 1.47209400  | -0.03984900 | 3.67004900  |
| H  | 0.18391900  | 4.51942900  | 2.36178200  |
| H  | -3.18726800 | -4.51267900 | -1.78405900 |
| H  | -4.40700400 | 2.67264000  | -3.16768800 |
| H  | 0.27258300  | -4.56204200 | 2.17195100  |
| H  | -4.33915600 | 0.04807700  | -3.20929700 |
| N  | -0.55033300 | -1.43536300 | 1.33200200  |
| N  | -2.40354700 | -1.40547600 | -0.82743900 |
| N  | -2.40654900 | 1.44112800  | -0.79253400 |
| N  | -0.55760000 | 1.41554200  | 1.37785900  |
| O  | -0.10751500 | 0.03069900  | -0.86109100 |
| S  | -3.45880100 | -0.06146300 | 1.58665000  |
| C  | 3.03609200  | 0.08704800  | -2.25279000 |
| H  | 2.15067100  | 0.12080900  | -2.88322000 |
| C  | 5.23958500  | 0.05607900  | -1.88398000 |
| C  | 5.05478800  | -0.00637800 | -0.46785700 |
| C  | 3.72500500  | -0.02333100 | 0.10953000  |
| H  | 1.76675500  | 0.02236700  | -0.63703400 |
| O  | 3.42636100  | -0.07453300 | 1.29931100  |
| N  | 4.21120400  | 0.10395900  | -2.79943500 |
| N  | 2.75789800  | 0.02855300  | -0.90627600 |
| C  | 6.33556500  | -0.03862300 | 0.05997100  |
| H  | 6.69971300  | -0.08668200 | 1.07570800  |
| N  | 6.53589300  | 0.06230300  | -2.21400200 |
| N  | 7.15989500  | 0.00402600  | -1.01161100 |
| H  | 8.16942500  | -0.00302500 | -1.00299100 |

#### <sup>4</sup>T2-TS1

Zero-point correction= 0.387695 (Hartree/Particle)  
Thermal correction to Energy= 0.416671  
Thermal correction to Enthalpy= 0.417616  
Thermal correction to Gibbs Free Energy= 0.326346  
Sum of electronic and zero-point Energies= -2073.033042  
Sum of electronic and thermal Energies= -2073.004065  
Sum of electronic and thermal Enthalpies= -2073.003121  
Sum of electronic and thermal Free Energies= -2073.094390

|    |             |             |             |
|----|-------------|-------------|-------------|
| C  | 0.40195000  | -1.97379800 | 2.28154100  |
| C  | 0.49506100  | -3.37906800 | 2.59953200  |
| C  | -0.38637500 | -4.02455800 | 1.78910900  |
| C  | -3.04232500 | 0.93808700  | -2.14388500 |
| C  | 1.00080600  | 0.38852600  | 2.68618100  |
| C  | -0.25004500 | 3.26512300  | 1.05592500  |
| C  | -2.51545300 | -2.32147600 | -0.85770600 |
| C  | 1.71802300  | 1.41357100  | 3.40855600  |
| C  | -3.72805700 | -1.43817600 | -2.53600100 |
| C  | -1.95558400 | -3.27322600 | -0.01590700 |
| C  | -2.98458500 | -0.41563300 | -1.84089900 |
| C  | -2.38524700 | 1.94883700  | -1.45019400 |
| C  | -2.51244600 | 3.35764700  | -1.72956500 |
| C  | 1.11636400  | -0.97499600 | 2.92984400  |
| C  | -1.74167200 | 4.01118700  | -0.81572600 |
| C  | 0.36320000  | 2.30862700  | 1.85192100  |
| C  | -1.13688700 | 3.00349500  | 0.01907700  |
| C  | 1.31772200  | 2.60564200  | 2.89371800  |
| C  | -1.01001600 | -3.01508100 | 0.96714800  |
| C  | -3.44298000 | -2.61835800 | -1.92176900 |
| Fe | -0.98021500 | -0.03585400 | 0.40526600  |
| H  | -2.25970400 | -4.30559900 | -0.15841100 |
| H  | 1.14974500  | -3.79629200 | 3.35397800  |
| H  | 2.43184200  | 1.22353300  | 4.19957500  |
| H  | -1.58486800 | 5.07647500  | -0.70441600 |
| H  | -4.38339400 | -1.25624200 | -3.37829500 |
| H  | -0.00668300 | 4.30501300  | 1.25046100  |
| H  | -3.70329900 | 0.61164800  | 1.12972400  |
| H  | 1.80909700  | -1.28390800 | 3.70663000  |
| H  | 1.63579700  | 3.60262500  | 3.16976300  |
| H  | -3.81172800 | -3.60852200 | -2.15706100 |
| H  | -3.12179900 | 3.77614300  | -2.52053200 |
| H  | -0.60457500 | -5.08341300 | 1.73447700  |
| H  | -3.67693000 | 1.23514400  | -2.97346600 |
| N  | -0.51726400 | -1.77650700 | 1.28297400  |
| N  | -2.25005800 | -0.97513400 | -0.82139900 |
| N  | -1.54387200 | 1.75254300  | -0.38386600 |
| N  | 0.17962800  | 0.95387900  | 1.75133900  |
| O  | 0.32535400  | -0.21797800 | -0.68397900 |
| S  | -2.69614600 | 0.38903300  | 2.00375700  |
| C  | 1.45653700  | 0.98088200  | -1.52130200 |
| H  | 0.68323800  | 1.73033100  | -1.64370000 |
| C  | 3.50104700  | 0.46864300  | -0.69285100 |
| C  | 3.78500900  | -0.42370900 | -1.77935100 |
| C  | 2.84701400  | -0.56778500 | -2.88124400 |
| H  | 1.00264400  | 0.16326400  | -3.36829500 |
| O  | 2.95795400  | -1.28196100 | -3.86767000 |
| N  | 2.38451800  | 1.22339800  | -0.57453000 |
| N  | 1.75322300  | 0.28754800  | -2.69898300 |
| C  | 5.01814800  | -0.96671400 | -1.49123300 |
| H  | 5.63503400  | -1.68240700 | -2.01461100 |
| N  | 4.50727600  | 0.47480000  | 0.20876500  |
| N  | 5.39223200  | -0.40014300 | -0.31225700 |
| H  | 6.24798500  | -0.56941000 | 0.19653400  |

#### <sup>4</sup>T2-Int

Zero-point correction= 0.387581 (Hartree/Particle)  
Thermal correction to Energy= 0.416957  
Thermal correction to Enthalpy= 0.417901  
Thermal correction to Gibbs Free Energy= 0.325609  
Sum of electronic and zero-point Energies= -2073.055362  
Sum of electronic and thermal Energies= -2073.025986  
Sum of electronic and thermal Enthalpies= -2073.025042  
Sum of electronic and thermal Free Energies= -2073.117334

|    |             |             |             |
|----|-------------|-------------|-------------|
| C  | 0.55408900  | 0.59283000  | 2.92305100  |
| C  | 0.96399300  | -0.07104700 | 4.13960800  |
| C  | 0.40828400  | -1.31265600 | 4.10913500  |
| C  | -2.89042700 | -1.52474000 | -1.90118000 |
| C  | 0.50847400  | 2.58557600  | 1.43742500  |
| C  | -1.12931800 | 2.97461200  | -1.66602900 |
| C  | -1.74410300 | -2.63524800 | 1.25344100  |
| C  | 0.86890500  | 3.95338100  | 1.14924900  |
| C  | -2.95169100 | -3.54405900 | -0.41154100 |
| C  | -1.05058700 | -2.51786200 | 2.45253900  |
| C  | -2.55891800 | -2.18907500 | -0.72491300 |
| C  | -2.57860600 | -0.20587500 | -2.22017900 |
| C  | -3.00916400 | 0.46886900  | -3.42061600 |
| C  | 0.89616800  | 1.89851900  | 2.58597500  |
| C  | -2.52797600 | 1.74075700  | -3.35059600 |
| C  | -0.41162900 | 3.08106300  | -0.47669200 |
| C  | -1.79785600 | 1.83843900  | -2.11121000 |
| C  | 0.29327200  | 4.26369400  | -0.04387500 |
| C  | -0.33263500 | -1.39842600 | 2.87168300  |
| C  | -2.44987400 | -3.81944800 | 0.82192400  |
| Fe | -1.00873000 | 0.19117000  | 0.35328400  |
| H  | -1.05560100 | -3.37926900 | 3.11425200  |
| H  | 1.59142100  | 0.37030300  | 4.90321600  |
| H  | 1.48564400  | 4.57631100  | 1.78397800  |
| H  | -2.64593500 | 2.54691400  | -4.06324900 |
| H  | -3.53632200 | -4.18325900 | -1.06059900 |
| H  | -1.16413700 | 3.85224400  | -2.30515300 |
| H  | -3.10074300 | 2.13412000  | 0.81475800  |
| H  | 1.52377400  | 2.43802800  | 3.28928100  |
| H  | 0.33674600  | 5.19468400  | -0.59423400 |
| H  | -2.53360600 | -4.73270800 | 1.39682800  |
| H  | -3.60652700 | 0.01658000  | -4.20185900 |
| H  | 0.48349500  | -2.10574400 | 4.84191700  |
| H  | -3.47571300 | -2.07906000 | -2.62936800 |
| N  | -0.23146800 | -0.23402700 | 2.16854100  |
| N  | -1.82783800 | -1.65211100 | 0.30207900  |
| N  | -1.84016300 | 0.64238500  | -1.43306700 |
| N  | -0.27103800 | 2.07269300  | 0.43905400  |
| O  | 0.54582300  | -0.53197600 | -0.40766000 |
| S  | -3.03902900 | 0.88335000  | 1.32441000  |
| C  | 1.34894200  | 0.08863900  | -1.35193000 |
| H  | 0.80036400  | 0.84542700  | -1.92533200 |
| C  | 3.57817400  | 0.10382700  | -0.60236700 |
| C  | 3.87997800  | -1.12037900 | -1.29698500 |
| C  | 2.90615100  | -1.72468900 | -2.21260400 |
| H  | 1.02886800  | -1.36855000 | -2.84108600 |
| O  | 3.07728900  | -2.76509200 | -2.84067400 |
| N  | 2.43412400  | 0.78094600  | -0.65830800 |
| N  | 1.78915700  | -0.92845200 | -2.33404100 |
| C  | 5.16109700  | -1.43860500 | -0.93705200 |
| H  | 5.80663000  | -2.26003600 | -1.21212600 |
| N  | 4.64814000  | 0.51052800  | 0.14681800  |
| N  | 5.56454000  | -0.44306800 | -0.08408500 |
| H  | 6.46156000  | -0.36431700 | 0.37299200  |

**<sup>4</sup>T2-TS2**

Zero-point correction= 0.383080 (Hartree/Particle)  
 Thermal correction to Energy= 0.412315  
 Thermal correction to Enthalpy= 0.413259  
 Thermal correction to Gibbs Free Energy= 0.322240  
 Sum of electronic and zero-point Energies= -2073.041153  
 Sum of electronic and thermal Energies= -2073.011918  
 Sum of electronic and thermal Enthalpies= -2073.010973  
 Sum of electronic and thermal Free Energies= -2073.101992

|    |             |             |             |
|----|-------------|-------------|-------------|
| C  | 3.12608800  | 1.12451500  | -1.75830900 |
| C  | 4.12811200  | 0.70268500  | -2.70792900 |
| C  | 4.16841200  | -0.65701700 | -2.65699000 |
| C  | -0.50385800 | -2.35649500 | 2.11349700  |
| C  | 1.86921800  | 2.87451200  | -0.55383600 |
| C  | -0.59829900 | 2.48332500  | 1.97219400  |
| C  | 2.01904500  | -2.79137200 | -0.35624900 |
| C  | 1.54265900  | 4.25534900  | -0.30035400 |
| C  | 0.78853300  | -4.15655600 | 0.94485800  |
| C  | 2.93683400  | -2.38175700 | -1.31462900 |
| C  | 0.45614100  | -2.77636300 | 1.19067500  |
| C  | -0.86900600 | -1.04597800 | 2.35859800  |
| C  | -1.75301000 | -0.60429300 | 3.39850700  |
| C  | 2.80052200  | 2.44909100  | -1.49013500 |
| C  | -1.77422700 | 0.76132800  | 3.36294900  |
| C  | 0.33036300  | 2.88474500  | 1.01174600  |
| C  | -0.90594600 | 1.17660200  | 2.29943300  |
| C  | 0.59054900  | 4.26191500  | 0.67296200  |
| C  | 3.19008400  | -1.06476500 | -1.67698000 |
| C  | 1.75693000  | -4.16535600 | -0.01502700 |
| Fe | 1.18589000  | 0.05244000  | 0.32431500  |
| H  | 3.50454300  | -3.15637200 | -1.82087300 |
| H  | 4.71719400  | 1.37285900  | -3.32077900 |
| H  | 1.99151400  | 5.09747000  | -0.81114700 |
| H  | -2.31626800 | 1.43753700  | 4.01173100  |
| H  | 0.32605700  | -4.99882700 | 1.44331500  |
| H  | -1.10614900 | 3.26750600  | 2.52483900  |
| H  | 2.88887800  | -1.05714800 | 2.40803000  |
| H  | 3.32275400  | 3.21498500  | -2.05499100 |
| H  | 0.09199500  | 5.11026300  | 1.12373800  |
| H  | 2.25397600  | -5.01647600 | -0.46254400 |
| H  | -2.27326000 | -1.26266500 | 4.08258800  |
| H  | 4.79746400  | -1.33518900 | -3.21927700 |
| H  | -0.98410200 | -3.12651400 | 2.70939500  |
| N  | 2.56061900  | 0.03404500  | -1.15430300 |
| N  | 1.21920900  | -1.95971000 | 0.39475400  |
| N  | -0.40693500 | 0.05553200  | 1.63554500  |
| N  | 1.12219900  | 2.05797400  | 0.26139400  |
| O  | -0.24074800 | -0.04151000 | -1.23393600 |
| S  | 2.78265000  | 0.25797800  | 2.11476100  |
| C  | -1.52230500 | -0.06049200 | -0.93657600 |
| H  | -1.50314700 | 0.05067600  | 0.25976900  |
| C  | -3.63329100 | 0.87157400  | -1.19973500 |
| C  | -4.27559600 | -0.41114200 | -1.28757700 |
| C  | -3.49387200 | -1.64986500 | -1.29720700 |
| H  | -1.50645300 | -2.14551600 | -1.21346400 |
| O  | -3.94192100 | -2.78527600 | -1.40665500 |
| N  | -2.31130000 | 1.09484900  | -1.12769000 |
| C  | -2.14807900 | -1.36134700 | -1.20228000 |
| N  | -5.61805400 | -0.13788000 | -1.37722700 |
| H  | -6.48257600 | -0.77903200 | -1.46744300 |
| N  | -4.54791100 | 1.87635700  | -1.22694100 |
| N  | -5.71502000 | 1.22496400  | -1.34062900 |
| H  | -6.56225100 | 1.77312800  | -1.39540900 |

**<sup>4</sup>T2-PC**

Zero-point correction= 0.389872 (Hartree/Particle)  
 Thermal correction to Energy= 0.420460  
 Thermal correction to Enthalpy= 0.421404  
 Thermal correction to Gibbs Free Energy= 0.321681  
 Sum of electronic and zero-point Energies= -2073.180229  
 Sum of electronic and thermal Energies= -2073.149641  
 Sum of electronic and thermal Enthalpies= -2073.148697  
 Sum of electronic and thermal Free Energies= -2073.248420

|    |             |             |             |
|----|-------------|-------------|-------------|
| C  | 3.15763600  | -0.69318200 | -1.96716400 |
| C  | 3.89163800  | -1.82612400 | -2.47549600 |
| C  | 3.65394300  | -2.86045000 | -1.62489300 |
| C  | -0.59437800 | -0.27630500 | 3.11628000  |
| C  | 2.42232800  | 1.64802400  | -2.10223100 |
| C  | 0.19244100  | 3.37996400  | 0.04141900  |
| C  | 1.45693400  | -2.64833300 | 1.45763300  |
| C  | 2.38354500  | 2.92883200  | -2.75748900 |
| C  | 0.14717700  | -2.65442300 | 3.28751500  |
| C  | 2.30881000  | -3.11499800 | 0.46691800  |
| C  | 0.14322700  | -1.36015200 | 2.65950700  |
| C  | -0.64853800 | 0.96284300  | 2.49645200  |
| C  | -1.39908000 | 2.08953000  | 2.98289900  |
| C  | 3.14520100  | 0.55769100  | -2.56402100 |
| C  | -1.18049100 | 3.11618800  | 2.11364700  |
| C  | 1.07996500  | 2.92437500  | -0.92343400 |
| C  | -0.29582400 | 2.62061100  | 1.09346000  |
| C  | 1.55026000  | 3.72065200  | -2.02645000 |
| C  | 2.77625300  | -2.35825600 | -0.59609300 |
| C  | 0.96046300  | -3.45366900 | 2.54100400  |
| Fe | 1.46056900  | 0.20635900  | 0.39830600  |
| H  | 2.62668300  | -4.15113800 | 0.52597600  |
| H  | 4.50137900  | -1.81243200 | -3.36987200 |
| H  | 2.92440800  | 3.17262400  | -3.66297600 |
| H  | -1.57371600 | 4.12406100  | 2.14926100  |
| H  | -0.41244800 | -2.90624700 | 4.17940200  |
| H  | -0.13802200 | 4.41147000  | -0.02875900 |
| H  | 3.19325000  | 0.08672500  | 2.67623400  |
| H  | 3.73368400  | 0.69112200  | -3.46615000 |
| H  | 1.26560800  | 4.74937300  | -2.20706800 |
| H  | 1.20671400  | -4.49667500 | 2.69417800  |
| H  | -2.01127300 | 2.08096200  | 3.87537500  |
| H  | 4.02740700  | -3.87539500 | -1.67294800 |
| H  | -1.17435900 | -0.41031400 | 4.02380900  |
| N  | 2.48030500  | -1.03648800 | -0.82285500 |
| N  | 0.95360700  | -1.36846700 | 1.54393900  |
| N  | 0.00254100  | 1.29192500  | 1.32285300  |
| N  | 1.62471700  | 1.66114600  | -0.98072700 |
| O  | -0.70245200 | -0.86453000 | -1.55385400 |
| S  | 3.30367300  | 1.00572600  | 1.69051100  |
| C  | -1.90955200 | -0.76268500 | -1.39012000 |
| H  | -1.82151800 | 0.44517800  | 0.25940100  |
| C  | -3.83663000 | 0.06426300  | -0.20490100 |
| C  | -4.72503100 | -0.59931200 | -1.08785100 |
| C  | -4.23393400 | -1.39833600 | -2.19802100 |
| H  | -2.40017100 | -1.93656600 | -2.98274700 |
| O  | -4.89254700 | -2.01275100 | -3.02034600 |
| N  | -2.47112900 | -0.02140200 | -0.36872800 |
| C  | -2.82510900 | -1.39719400 | -2.23712000 |
| N  | -5.98657900 | -0.28005400 | -0.60847400 |
| H  | -6.97209300 | -0.55489300 | -0.95423100 |
| N  | -4.46199600 | 0.74287400  | 0.74814200  |
| N  | -5.77915800 | 0.50697000  | 0.46664300  |
| H  | -6.47423200 | 0.92773600  | 1.06496600  |
